# Supplementary material for: Effect of landiolol on sex-related transcriptomic changes in the myocardium during sepsis
Source: Intensive Care Med Exp. 2019 Aug 19;7:50. doi: 10.1186/s40635-019-0263-0 (PMC6701793; doi:10.1186/s40635-019-0263-0)
Supplement: Supplementary file 1 — Lists of differentially expressed genes in male and female hearts after cecal ligation and puncture and landiolol. Lists of significantly up- and down-regulated genes, obtained after 2-class SAM, in CLP group vs sham group (FDR < 0,01) and in CLP plus landiolol group vs CLP (FDR < 0,05) in males and females. Common genes between males and females are noted in blue. (XLSX 211 kb) [file 40635_2019_263_MOESM1_ESM.xlsx]

## Sheet: Male UP in CLP
List of the 1259 genes in male significantly up-regulated in CLP vs SHAM (SAM2, FDR<0,01). The common genes between male and female are found in blue.
Gene	Description
A2m	Alpha-2-macroglobulin
AA819208	UI-R-A0-al-f-02-0-UI.s2 UI-R-A0 cDNA clone UI-R-A0-al-f-02-0-UI 3' sequence
AA858936	UI-R-A0-bi-h-10-0-UI.s1 UI-R-A0 cDNA clone UI-R-A0-bi-h-10-0-UI 3' similar to gb
AA925776	UI-R-A1-ep-h-12-0-UI.s1 UI-R-A1 cDNA clone UI-R-A1-ep-h-12-0-UI 3' sequence
AA946080	EST201579 Normalized rat lung, Bento Soares Rattus sp. cDNA clone RLUBB04 3' end sequence
Aacs	Acetoacetyl-CoA synthetase
Aadat	Aminoadipate aminotransferase
Aak1	AP2 associated kinase 1
Abca1	PREDICTED: ATP-binding cassette, subfamily A , member 1
Abca5	PREDICTED: ATP-binding cassette, subfamily A , member 5
Abcb4	ATP-binding cassette, subfamily B, member 4
Abl1	ABL proto-oncogene 1, non-receptor tyrosine kinase
Abr	Active BCR-related
Ace	Angiotensin I converting enzyme
Acer2	Alkaline ceramidase 2
Ackr1	PREDICTED: atypical chemokine receptor 1
Acox1	Acyl-CoA oxidase 1, palmitoyl
Acsbg1	Acyl-CoA synthetase bubblegum family member 1
Acsl4	Acyl-CoA synthetase long-chain family member 4
Acss2	Acyl-CoA synthetase short-chain family member 2
Actn3	Actinin alpha 3
Acvr1b	Activin A receptor, type IB
Adam9	ADAM metallopeptidase domain 9
Adamts12	ADAM metallopeptidase with thrombospondin type 1 motif, 12
Adamts6	PREDICTED: ADAM metallopeptidase with thrombospondin type 1 motif, 6
Adamts9	ADAM metallopeptidase with thrombospondin type 1 motif, 9
Adat3	Adenosine deaminase, tRNA-specific 3
Adck4	AarF domain containing kinase 4
Adgra1	PREDICTED: G protein-coupled receptor 123
Adgre1	Adhesion G protein-coupled receptor E1
Adgrg5	PREDICTED: G protein-coupled receptor 114
Adgrg6	PREDICTED: G protein-coupled receptor 126
Adora3	Adenosine A3 receptor
Adrbk2	PREDICTED: adrenergic, beta, receptor kinase 2
AF050661	Activity and neurotransmitter-induced early gene 9
Aff1	AF4/FMR2 family, member 1
Agfg1	ArfGAP with FG repeats 1
Agfg2	ArfGAP with FG repeats 2
Agpat4	1-acylglycerol-3-phosphate O-acyltransferase 4
Ahcy	Adenosylhomocysteinase
Ahsg	Alpha-2-HS-glycoprotein
AI113094	cDNA clone UI-R-E1-fm-d-09-0-UI 3' sequence
AI179520	cDNA clone RSPCI48 3' end sequence
AI233861	cDNA clone RLUCS10 3' end sequence
AI556689	cDNA clone UI-R-C2p-rj-c-12-0-UI 3' sequence
Aif1	Allograft inflammatory factor 1
Ajap1	Adherens junction associated protein 1
Akap13	A kinase anchor protein 13
Alox5ap	Arachidonate 5-lipoxygenase activating protein
Ampd3	Adenosine monophosphate deaminase 3
Ang	Angiogenin, ribonuclease, RNase A family, 5
Ang2	Angiogenin, ribonuclease A family, member 2
Angel1	Angel homolog 1
Ank3	Ankyrin 3, node of Ranvier
Ankrd2	Ankyrin repeat domain 2
Ankrd23	Ankyrin repeat domain 23
Ankrd28	PREDICTED: ankyrin repeat domain 28
Ankrd6	Ankyrin repeat domain 6
Ankzf1	Ankyrin repeat and zinc finger domain containing 1
Anp32b	Acidic (leucine-rich) nuclear phosphoprotein 32 family, member B
Anp32e	Acidic (leucine-rich) nuclear phosphoprotein 32 family, member B
Antxr2	PREDICTED: anthrax toxin receptor 2
Ap3s1	Adaptor-related protein complex 3, sigma 1 subunit
Aqp1	Aquaporin 1
Aqp2	Aquaporin 2
Arfgap1	PREDICTED: ADP-ribosylation factor GTPase activating protein 1
Arhgap10	Rho GTPase activating protein 10
Arhgap12	Rho GTPase activating protein 12
Arhgap31	Rho GTPase activating protein 31
Arhgap4	Rho GTPase activating protein 4
Arhgap8	Rho GTPase activating protein 8
Arhgef5	PREDICTED: Rho guanine nucleotide exchange factor
Arid4b	AT rich interactive domain 4B
Arid5a	PREDICTED: AT rich interactive domain 5A
Arid5b	AT rich interactive domain 5B
Arl5a	ADP-ribosylation factor-like 5A
Armc7	Armadillo repeat containing 7
Arrdc3	Arrestin domain containing 3
Asah2	N-acylsphingosine amidohydrolase
Asb4	PREDICTED: ankyrin repeat and SOCS box-containing 4
Ash1l	Ash1 absent, small, or homeotic)-like
Asns	Asparagine synthetase
Atf6	Activating transcription factor 6
Atg13	Autophagy related 13
Atl3	Atlastin GTPase 3
Atmin	ATM interactor
Atp10d	PREDICTED: ATPase, class V, type 10D
Atp1b3	ATPase, Na+/K+ transporting, beta 3 polypeptide
Atxn3	Ataxin 3
AW142419	cDNA clone RGIAL21 5' end sequence
AW914998	cDNA clone RGIBN31 5' end sequence
B3galtl	PREDICTED: beta 1,3-galactosyltransferase-like
B4galt1	UDP-Gal:betaGlcNAc beta 1,4- galactosyltransferase, polypeptide 1
B4galt6	UDP-Gal:betaGlcNAc beta 1,4-galactosyltransferase, polypeptide 6
Bach1	BTB and CNC homology 1, basic leucine zipper transcription factor 1
Baz2b	PREDICTED: bromodomain adjacent to zinc finger domain, 2B
BC098778	CDNA clone IMAGE:7374368.
Bcar1	Breast cancer anti-estrogen resistance 1
Bcat1	Branched chain amino acid transaminase 1, cytosolic
Bcl6	B-cell CLL/lymphoma 6
Bclaf1	BCL2-associated transcription factor 1
Bdh1	3-hydroxybutyrate dehydrogenase, type 1
BE098228	cDNA clone UI-R-BJ1-asz-c-10-0-UI 3' sequence
Bend7	BEN domain containing 7
BF399443	cDNA clone UI-R-CA1-bjb-j-15-0-UI 3' sequence
BF411923	cDNA clone UI-R-BT1-bmx-f-09-0-UI 3' sequence
BF547255	cDNA clone UI-R-C2p-ql-g-04-0-UI 5' sequence
BF558789	cDNA clone UI-R-A1-dt-e-10-0-UI 5' sequence
BF559782	cDNA clone UI-R-A0-bn-c-05-0-UI 5' sequence
BF564013	cDNA clone UI-R-C4-alc-e-05-0-UI 5' sequence
BF564093	cDNA clone UI-R-C4-ald-d-09-0-UI 5' sequence
BF564094	cDNA clone UI-R-C4-ald-d-10-0-UI 5' sequence
BF565662	cDNA clone UI-R-BT1-ako-f-11-0-UI 5' sequence
Bfsp1	Beaded filament structural protein 1, filensin
Bhlha15	Basic helix-loop-helix family, member a15
Blzf1	Basic leucine zipper nuclear factor 1
Bmx	BMX non-receptor tyrosine kinase
Bnip3	BCL2/adenovirus E1B interacting protein 3
BP483351	Pancreatic islet cDNA clone RBC05151 5' sequence
BP486224	Insulinoma RINm5F cDNA clone RI03054 3' sequence
BQ200854	cDNA clone UI-R-EB1-clq-k-20-0-UI 3' sequence
BQ780562	cDNA clone UI-R-FF0-cpa-a-09-0-UI 3' sequence
Brpf3	PREDICTED: bromodomain and PHD finger containing, 3
Bscl2	Berardinelli-Seip congenital lipodystrophy 2
Btf3	Basic transcription factor 3
Btg1	B-cell translocation gene 1, anti-proliferative
Btla	PREDICTED: B and T lymphocyte associated
Btrc	Beta-transducin repeat containing E3 ubiquitin protein ligase
C3	Complement component 3
C3ar1	PREDICTED: complement component 3a receptor 1
C5ar2	PREDICTED: complement component 5a receptor 2
CA509943	cDNA clone UI-R-FS0-cqt-a-21-0-UI 3' sequence
Calb2	Calbindin 2
Camta1	Calmodulin binding transcription activator 1
Capg	Capping protein
Capn10	Calpain 10
Card6	Caspase recruitment domain family, member 6
Carhsp1	Calcium regulated heat stable protein 1
Casp3	Caspase 3
Cast	Calpastatin
Cblb	PREDICTED: Cbl proto-oncogene B, E3 ubiquitin protein ligase
Ccdc175	Coiled-coil domain containing 175
Ccl27	Chemokine (C-C motif) ligand 27
Ccl6	Chemokine (C-C motif) ligand 6
Cct6a-ps1	PREDICTED: chaperonin containing Tcp1, subunit 6A
Cd14	CD14 molecule
Cd200r1	CD200 receptor 1
Cd302	CD302 molecule
Cd320	CD320 molecule
CD373272	cDNA clone UI-R-GO0-csi-d-20-0-UI 5' sequence
Cd3eap	CD3e molecule, epsilon associated protein
Cd44	CD44 molecule
Cd47	Cd47 molecule
Cd59	CD59 molecule, complement regulatory protein
Cd6	Cd6 molecule
Cd68	Cd68 molecule
Cd99l2	CD99 molecule-like 2
Cda	Cytidine deaminase
Cdc123	Cell division cycle 123
Cdc37l1	Cell division cycle 37-like 1
Cdc42ep4	CDC42 effector protein
Cdh16	Cadherin 16
Cdk20	Cyclin-dependent kinase 20
Cdkl2	Cyclin-dependent kinase-like 2
Cdkn1b	Cyclin-dependent kinase inhibitor 1B
Cdkn2aipnl	CDKN2A interacting protein N-terminal like
Cdkn2d	Similar to cyclin-dependent kinase inhibitor 2D
Cdo1	Cysteine dioxygenase type 1
Cebpb	CCAAT/enhancer binding protein (C/EBP), beta
Cenpa	PREDICTED: centromere protein A
Cep85l	Centrosomal protein 85-like
Cerk	Ceramide kinase
Ces1c	Carboxylesterase 1C
Ces1d	Carboxylesterase 1D
Ces1e	Carboxylesterase 1E
CF114236	cDNA libraries cDNA clone NA4853 5' sequence
Cfb	Complement factor B
Cfdp1	Craniofacial development protein 1
Chi3l1	Chitinase 3-like 1
Chic2	Cysteine-rich hydrophobic domain 2
Chrd	Chordin
Chst11	PREDICTED: carbohydrate
Chtop	Similar to DKFZP547E1010 protein
Cirbp	Cold inducible RNA binding protein
CK475418	cDNA clone IMAGE:7123048 5' sequence
CK653326	cDNA clone IMAGE:7114503 5' sequence
CK839132	cDNA clone UI-R-AE1-zj-h-05-0-UI 3' sequence
Cklf	Chemokine-like factor
Clcn2	Chloride channel, voltage-sensitive 2
Clec12b	C-type lectin domain family 12, member B
Clec14a	C-type lectin domain family 14, member A
Clec2e	PREDICTED: C-type lectin domain family 2, member E
Clec4a1	C-type lectin domain family 4, member A1
Clec4a2	C-type lectin domain family 4, member A2
Clec4a3	C-type lectin domain family 4, member A3
Clic2	Chloride intracellular channel 2
Clic5	Chloride intracellular channel 5
Clstn2	Calsyntenin 2
Cml5	Camello-like 5
CO384928	AGENCOURT_26623881 NIH_MGC_253 cDNA clone IMAGE:7301399 5' sequence
CO389694	AGENCOURT_26625446 NIH_MGC_253 cDNA clone IMAGE:7304424 5' sequence
CO555296	AGENCOURT_28621796 NIH_MGC_250 cDNA clone IMAGE:7383237 5' sequence
Corin	Corin, serine peptidase
Coro1a	Coronin, actin binding protein 1A
Cp	Ceruloplasmin
Cpeb4	PREDICTED: cytoplasmic polyadenylation element binding protein 4
Cpm	Carboxypeptidase M
Cpne6	Copine VI
Cpne8	Copine VIII
Crebrf	CREB3 regulatory factor
Crem	CAMP responsive element modulator
Crtc3	PREDICTED: CREB regulated transcription coactivator 3
Csf2rb	Colony stimulating factor 2 receptor, beta, low-affinity
Csf3	Colony stimulating factor 3
Csgalnact1	Chondroitin sulfate N-acetylgalactosaminyltransferase 1
Csgalnact2	Chondroitin sulfate N-acetylgalactosaminyltransferase 2
Csnk1a1	Casein kinase 1, alpha 1
Ctdsp2	PREDICTED: CTD (carboxy-terminal domain, RNA polymerase II, polypeptide A) small phosphatase 2
Ctla2a	Cytotoxic T lymphocyte-associated protein 2 alpha
Ctnna3	PREDICTED: catenin (cadherin associated protein), alpha 3
Ctps2	CTP synthase 2
Ctsl	Cathepsin L
Ctsz	Cathepsin Z
Cttn	Cortactin
Ctu1	Cytosolic thiouridylase subunit 1
Cubn	Cubilin
Cul4b	Cullin 4B
Cux1	PREDICTED: cut-like homeobox 1
CX570057	RVL1169 Wackym-Soares normalized rat vestibular cDNA library cDNA 5' sequence
CX570509	RVL1672 Wackym-Soares normalized rat vestibular cDNA library cDNA 5' sequence
CX570601	RVL1770 Wackym-Soares normalized rat vestibular cDNA library cDNA 5' sequence
Cxcl13	C-X-C motif chemokine ligand 13
Cyb561	Cytochrome b-561
Cyp4b1	Cytochrome P450, family 4, subfamily b, polypeptide 1
Dapk1	Death associated protein kinase 1
Dbh	Dopamine beta-hydroxylase
Dcaf8	DDB1 and CUL4 associated factor 8
Dclre1a	DNA cross-link repair 1A
Dcn	Decorin
Ddit4	DNA-damage-inducible transcript 4
Ddx11	DEAD/H-box helicase 11
Ddx21	DEAD/H-box helicase 21
Ddx24	DEAD/H-box helicase 24
Ddx31	DEAD/H-box helicase 31
Dedd	Death effector domain-containing
Defb4	Defensin beta 4
Dennd2c	DENN/MADD domain containing 2C
Depdc7	DEP domain containing 7
Derl3	Derlin 3
Dgke	PREDICTED: diacylglycerol kinase, epsilon 64kDa
Dixdc1	DIX domain containing 1
Dkk3	Dickkopf WNT signaling pathway inhibitor 3
Dlgap1	DLG associated protein 1
Dmbt1	Deleted in malignant brain tumors 1
Dok3	Docking protein 3
DV722285	RVL13720 Wackym-Soares normalized rat vestibular cDNA library cDNA 5' sequence
DV722942	RVL14623 Wackym-Soares normalized rat vestibular cDNA library cDNA 5' sequence
DV727695	RVL20233 Wackym-Soares normalized rat vestibular cDNA library cDNA 5' sequence
Dyrk3	Dual-specificity tyrosine-
Ebf1	Early B-cell factor 1
Ebna1bp2	EBNA1 binding protein 2
Ecscr	PREDICTED: endothelial cell surface expressed chemotaxis and apoptosis regulator
Eddm3b	Epididymal protein 3B
Edem1	ER degradation enhancer, mannosidase alpha-like 1
Ednrb	PREDICTED: endothelin receptor type B
Eefsec	Eukaryotic elongation factor, selenocysteine-tRNA-specific
Efna1	Ephrin A1
Efna5	PREDICTED: ephrin A5
Egln2	Egl-9 family hypoxia-inducible factor 2
Ehbp1	EH domain binding protein 1
Eif1a	PREDICTED: eukaryotic translation initiation factor 1A
Eif2s1	Eukaryotic translation initiation factor 2, subunit 1 alpha
Eif4a1	Eukaryotic translation initiation factor 4A1
Eif4ebp1	Eukaryotic translation initiation factor 4E binding protein 1
Ell	Elongation factor RNA polymerase II
Emb	Embigin
Emilin1	Elastin microfibril interfacer 1
Eml4	Echinoderm microtubule associated protein like 4
Endou	Endonuclease, poly
Enpp3	Ectonucleotide pyrophosphatase/phosphodiesterase 3
ENSRNOT00000001766	PREDICTED: breakpoint cluster region
ENSRNOT00000002790	PREDICTED: BOC cell adhesion associated, oncogene regulated
ENSRNOT00000003002	PREDICTED: ribosomal protein L12, pseudogene 1
ENSRNOT00000003146	AMGNNUC:NRPI1-00018-H8-A W Rat pituitary
ENSRNOT00000003260	Similar to 60S ribosomal protein L7a
ENSRNOT00000003295	PREDICTED: phosphatidylcholine transfer protein
ENSRNOT00000004517	PREDICTED: chibby homolog 3
ENSRNOT00000004528	PREDICTED: myosin binding protein H
ENSRNOT00000004831	Unknown
ENSRNOT00000005036	Similar to ribosomal protein L10a
ENSRNOT00000005064	PREDICTED: ring finger protein, transmembrane 1
ENSRNOT00000005886	Unknown
ENSRNOT00000006969	Unknown
ENSRNOT00000007419	PREDICTED: glucoside xylosyltransferase 2
ENSRNOT00000008940	AK129370 mKIAA1470 protein {Mus musculus}
ENSRNOT00000009295	PREDICTED: histone deacetylase 6
ENSRNOT00000009898	PREDICTED: Bardet-Biedl syndrome 12
ENSRNOT00000010079	PREDICTED: asparagine synthetase
ENSRNOT00000010954	PREDICTED: MYC associated factor X
ENSRNOT00000011061	PREDICTED: WW and C2 domain containing 1
ENSRNOT00000011272	PREDICTED: basic transcription factor 3-like 4
ENSRNOT00000011718	PREDICTED: similar to component of oligomeric golgi complex 5 isoform 1
ENSRNOT00000012487	PREDICTED: phosphatidylinositol-4,5-bisphosphate 3-kinase, catalytic subunit gamma
ENSRNOT00000012543	Unknown
ENSRNOT00000012600	AGENCOURT_27546420 NIH_MGC_254 cDNA clone IMAGE:7315569 5' sequence
ENSRNOT00000013308	PREDICTED: C-type lectin domain family 4, member A3
ENSRNOT00000013359	PREDICTED: UBA-like domain containing 2
ENSRNOT00000013761	Unknown
ENSRNOT00000013851	PREDICTED: RAB30, member RAS oncogene family
ENSRNOT00000014073	TL0ABA38YN22 mRNA sequence.
ENSRNOT00000014191	PREDICTED: similar to dystonin isoform 1
ENSRNOT00000014436	Q80TA0_MOUSE
ENSRNOT00000014519	Q6UXF1_HUMAN
ENSRNOT00000015113	AGENCOURT_109865318 NIH_MGC_418 cDNA clone IMAGE:9023548 5' sequence
ENSRNOT00000016262	AGENCOURT_27538394 NIH_MGC_254 cDNA clone IMAGE:7312294 5' sequence
ENSRNOT00000017270	TL0ADA10YG09 mRNA sequence.
ENSRNOT00000017313	PREDICTED: keratin-associated protein 4-7-like
ENSRNOT00000018251	PREDICTED: hypothetical protein LOC691161
ENSRNOT00000018953	PREDICTED: forkhead-associated
ENSRNOT00000019383	Unknown
ENSRNOT00000019539	Strain Fisher 344 UBE2Q2Y mRNA, complete cds.
ENSRNOT00000019544	Solute carrier family 31
ENSRNOT00000020018	Unknown
ENSRNOT00000021197	Unknown
ENSRNOT00000021365	Unknown
ENSRNOT00000023216	Unknown
ENSRNOT00000023237	TL0ACA31YH23 mRNA sequence.
ENSRNOT00000023459	AMGNNUC:NRHY5-00408-H11-A W Rat hypothalamus
ENSRNOT00000023642	PREDICTED: unkempt family zinc finger-like
ENSRNOT00000023646	PREDICTED: HECT and RLD domain containing E3 ubiquitin protein ligase family member 1
ENSRNOT00000024174	PREDICTED: RAN binding protein 9
ENSRNOT00000024317	Unknown
ENSRNOT00000024556	Unknown
ENSRNOT00000024679	PREDICTED: TBC1 domain family, member 30
ENSRNOT00000025426	Unknown
ENSRNOT00000026448	PREDICTED: ArfGAP with RhoGAP domain, ankyrin repeat and PH domain 1
ENSRNOT00000026611	PREDICTED: RNA binding motif protein 4
ENSRNOT00000026654	PREDICTED: protein tyrosine phosphatase, receptor type, N
ENSRNOT00000026680	Q505D1_MOUSE
ENSRNOT00000026748	PREDICTED: integrin, alpha M
ENSRNOT00000027259	Unknown
ENSRNOT00000028535	Syntaxin 3
ENSRNOT00000028905	Unknown
ENSRNOT00000029097	PREDICTED: pseudouridylate synthase 7 homolog
ENSRNOT00000029109	PREDICTED: family with sequence similarity 189, member A2
ENSRNOT00000029202	TL0AEA67YF06 mRNA sequence.
ENSRNOT00000029593	PREDICTED: regulator of calcineurin 2
ENSRNOT00000029774	Unknown
ENSRNOT00000029982	Unknown
ENSRNOT00000030007	MRNA for CAK beta
ENSRNOT00000030798	PREDICTED: alpha-kinase 1
ENSRNOT00000031255	Unknown
ENSRNOT00000031786	PREDICTED: zinc finger protein 865-like
ENSRNOT00000031814	Unknown
ENSRNOT00000032337	Unknown
ENSRNOT00000032671	Unknown
ENSRNOT00000033335	Unknown
ENSRNOT00000033795	Q6P6F8_MOUSE
ENSRNOT00000035283	Similar to Ab2-162
ENSRNOT00000036128	PREDICTED: family with sequence similarity 24, member A
ENSRNOT00000036340	Unknown
ENSRNOT00000036374	PREDICTED: family with sequence similarity 179, member A
ENSRNOT00000036995	PREDICTED: ADAMTS-like 2
ENSRNOT00000037130	Similar to Ab2-162
ENSRNOT00000039652	PREDICTED: similar to very large G-protein coupled receptor 1
ENSRNOT00000039733	PREDICTED: laeverin
ENSRNOT00000039797	PREDICTED: paired immunoglobin-like type 2 receptor alpha
ENSRNOT00000039846	PREDICTED: heterogeneous nuclear ribonucleoprotein A1-like
ENSRNOT00000039904	PREDICTED: RNA binding motif, single stranded interacting protein 3
ENSRNOT00000040517	Unknown
ENSRNOT00000041472	Unknown
ENSRNOT00000042163	PREDICTED: synaptotagmin-like 2
ENSRNOT00000042547	Unknown
ENSRNOT00000042925	Q32KJ4_RAT
ENSRNOT00000044011	PREDICTED: ferritin light chain 1-like
ENSRNOT00000044346	TL0ACA43YI20 mRNA sequence.
ENSRNOT00000044643	Similar to ferritin light chain - mouse
ENSRNOT00000044780	Guanine nucleotide regulatory protein mRNA, partial cds.
ENSRNOT00000045407	Similar to 60S RIBOSOMAL PROTEIN L3
ENSRNOT00000045434	Unknown
ENSRNOT00000045589	PREDICTED: phosphatidylinositol-4,5-bisphosphate 3-kinase, catalytic subunit gamma
ENSRNOT00000046530	AGENCOURT_31913726 NIH_MGC_238 cDNA clone IMAGE:7453281 5' sequence
ENSRNOT00000047223	Q5DTF0_MOUSE
ENSRNOT00000048218	PREDICTED: pericentrin
ENSRNOT00000048258	Unknown
ENSRNOT00000048965	Unknown
ENSRNOT00000049856	Similar to ferritin light chain
ENSRNOT00000050544	PREDICTED: similar to ferritin heavy polypeptide-like 17
ENSRNOT00000050834	PREDICTED: transcriptional enhancer factor TEF-3-like
ENSRNOT00000050988	PREDICTED: protein diaphanous homolog 2-like
ENSRNOT00000051352	Zbs559 mRNA, complete cds.
ENSRNOT00000052412	LRRGT00040 mRNA, complete cds.
ENSRNOT00000054910	Unknown
ENSRNOT00000055888	PREDICTED: xin actin-binding repeat-containing protein 1-like
ENSRNOT00000055893	MRNA for 92Aa-Protein.
ENSRNOT00000057111	Unknown
ENSRNOT00000057522	PREDICTED: vacuolar protein sorting 13 homolog C
ENSRNOT00000057950	PREDICTED: catenin alpha-3-like
ENSRNOT00000058284	PREDICTED: rho GTPase-activating protein 20-like
ENSRNOT00000058486	Similar to M-BDG29
ENSRNOT00000058957	Unknown
ENSRNOT00000059323	PREDICTED: similar to paired-Ig-like receptor B
ENSRNOT00000059892	PREDICTED: solute carrier family 13
ENSRNOT00000060002	PREDICTED: PML-RARA regulated adaptor molecule 1
ENSRNOT00000060868	BMP-2 inducible kinase
ENSRNOT00000062053	Unknown
ENSRNOT00000064029	PREDICTED: angiogenin, ribonuclease, RNase A family, 5
ENSRNOT00000064251	FQ122276 skeletal muscle Sprague-Dawley cDNA 5' sequence
ENSRNOT00000064320	Unknown
ENSRNOT00000065618	PREDICTED: polypeptide N-acetylgalactosaminyltransferase 15
ENSRNOT00000065673	PREDICTED: similar to natural cytotoxicity triggering receptor 2
ENSRNOT00000065971	CDNA clone IMAGE:9033955.
ENSRNOT00000066468	RAD18 transcript variant
ENSRNOT00000066713	Q86UU5_HUMAN
ENSRNOT00000066758	PREDICTED: keratin-associated protein 4-12-like
ENSRNOT00000067616	PREDICTED: endothelin converting enzyme 1
ENSRNOT00000067664	Unknown
ENSRNOT00000067907	CDNA clone IMAGE:7454658, containing frame-shift errors.
ENSRNOT00000068577	PREDICTED: RGD1561796
ENSRNOT00000068774	PREDICTED: myelin regulatory factor-like
ENSRNOT00000071406	PREDICTED: similar to threonine aldolase 1
ENSRNOT00000071535	Unknown
ENSRNOT00000071828	Unknown
ENSRNOT00000072372	Unknown
ENSRNOT00000073052	WDR74_MOUSE
ENSRNOT00000073144	TL0AEA106YN01 mRNA sequence.
ENSRNOT00000073206	Unknown
ENSRNOT00000073957	PREDICTED: transmembrane protein 29
ENSRNOT00000073961	FQ096638 brain Sprague-Dawley cDNA 5' sequence
ENSRNOT00000074034	Unknown
ENSRNOT00000074057	PREDICTED: similar to paired immunoglobin-like type 2 receptor beta
ENSRNOT00000074410	Q6PDN6_MOUSE
ENSRNOT00000074647	Unknown
ENSRNOT00000074737	PREDICTED: pericentrin
ENSRNOT00000074772	PREDICTED: ubiquitin specific peptidase 19
ENSRNOT00000074966	PREDICTED: membrane-spanning 4-domains, subfamily A, member 4A
ENSRNOT00000075097	Unknown
ENSRNOT00000075232	Similar to Heterogeneous nuclear ribonucleoprotein A1
ENSRNOT00000075374	Unknown
ENSRNOT00000075631	Similar to Fatty acid-binding protein, epidermal
ENSRNOT00000075813	AGENCOURT_114822580 NIH_MGC_433 cDNA clone IMAGE:9099023 5' sequence
ENSRNOT00000076452	PREDICTED: neuralized E3 ubiquitin protein ligase 1
ENSRNOT00000076782	PREDICTED: similar to topoisomerase
Entpd1	Ectonucleoside triphosphate diphosphohydrolase 1
Epb4.1	PREDICTED: erythrocyte membrane protein band 4.1
Epc2	Enhancer of polycomb homolog 2
Epha5	EPH receptor A5
Epha7	Eph receptor A7
Ercc3	Excision repair cross-complementation group 3
Ern1	PREDICTED: endoplasmic reticulum to nucleus signaling 1
Etf1	Eukaryotic translation termination factor 1
Etv5	Ets variant 5
Etv6	Ets variant 6
EX490449	AGENCOURT_118848732 NIH_MGC_246 cDNA clone IMAGE:8882493 5' sequence
Exosc2	Exosome component 2
F11r	F11 receptor
Fabp5	Fatty acid binding protein 5, epidermal
Fam161a	Family with sequence similarity 161, member A
Fam29a	PREDICTED: family with sequence similarity 29, member A
Fam46a	Family with sequence similarity 46, member A
Fam49a	Family with sequence similarity 49, member A
Fam65b	Family with sequence similarity 65, member B
Fam91a1	Family with sequence similarity 91, member A1
Fbl	Fibrillarin
Fcer1g	Fc fragment of IgE, high affinity I, receptor for; gamma polypeptide
Fcgr2a	Fc fragment of IgG, low affinity IIa, receptor
Fcgr2b	Fc fragment of IgG, low affinity IIb, receptor
Fcho2	FCH domain only 2
Fdx1	Ferredoxin 1
Fermt3	Fermitin family member 3
Fgd3	PREDICTED: FYVE, RhoGEF and PH domain containing 3
Fgf2	RAt basic fibroblast growth factor
Fgr	FGR proto-oncogene, Src family tyrosine kinase
Fhdc1	FH2 domain containing 1
Ficd	PREDICTED: FIC domain containing
Fkbp10	FK506 binding protein 10
Fkbp5	FK506 binding protein 5
Flot1	Flotillin 1
Flot2	Flotillin 2
Flrt2	Fibronectin leucine rich transmembrane protein 2
FM092177	FM092177 etnofat cDNA clone etnofatP0022G03 5' sequence
Fmo2	PREDICTED: flavin containing monooxygenase 2
Fndc3b	PREDICTED: fibronectin type III domain containing 3B
Foxq1	Forkhead box Q1
FQ136565	FQ136565 11-12 days foetus Sprague-Dawley cDNA clone TL0ADA10YC09 3' sequence
FQ213144	TL0AAA49YH21 mRNA sequence.
FQ220235	TL0ADA43YL03 mRNA sequence.
FQ220266	TL0ADA43YI23 mRNA sequence.
FQ226417	TL0AEA2YE08 mRNA sequence.
FQ230284	TL0AEA9YK01 mRNA sequence.
FQ231558	TL0AEA6YA22 mRNA sequence.
FQ233225	TL0AEA62YL02 mRNA sequence.
Frat1	PREDICTED: frequently rearranged in advanced T-cell lymphomas 1
Fst	Follistatin
Ftl1	Ferritin light chain 1
Ftsj3	FtsJ homolog 3
Fubp1	PREDICTED: far upstream element
Fyb	PREDICTED: FYN binding protein
Fyttd1	Forty-two-three domain containing 1
G3bp2	PREDICTED: GTPase activating protein
Gabarapl1	GABA type A receptor associated protein like 1
Gal	Galanin/GMAP prepropeptide
Galnt4	Polypeptide N-acetylgalactosaminyltransferase 4
Gar1	GAR1 ribonucleoprotein
Garem	PREDICTED: GRB2 associated, regulator of MAPK1
Gas5	Growth arrest specific 5
Gas7	Growth arrest specific 7
Gatsl2	GATS protein-like 2
Gcs1	Glucosidase 1
Gda	Guanine deaminase
Ggn	Gametogenetin
Ggps1	Geranylgeranyl diphosphate synthase 1
Ghrhr	Growth hormone releasing hormone receptor
Glul	Glutamate-ammonia ligase
Gmfg	Glia maturation factor, gamma
Gnai3	Guanine nucleotide binding protein
Gnat2	PREDICTED: guanine nucleotide binding protein
Gng12	Guanine nucleotide binding protein
Gnl2	Guanine nucleotide binding protein-like 2
Gnl3	Guanine nucleotide binding protein-like 3
Gnptab	PREDICTED: N-acetylglucosamine-1-phosphate transferase, alpha and beta subunits
Gnrh1	Gonadotropin-releasing hormone 1
Gpatch11	G patch domain containing 11
Gpatch4	G patch domain containing 4
Gphn	Gephyrin
Gpihbp1	Glycosylphosphatidylinositol anchored high density lipoprotein binding protein 1
Gpr162	G protein-coupled receptor 162
Gpr176	G protein-coupled receptor 176
Gpr182	G protein-coupled receptor 182
Gpr84	G protein-coupled receptor 84
Gprc5d	G protein-coupled receptor, class C, group 5, member D
Grb10	Growth factor receptor bound protein 10
Greb1	PREDICTED: growth regulation by estrogen in breast cancer 1
Grik3	PREDICTED: glutamate receptor, ionotropic, kainate 3
Grk5	PREDICTED: G protein-coupled receptor kinase 5
Gsg2	PREDICTED: germ cell associated 2
Gsk3b	PREDICTED: glycogen synthase kinase 3 beta
Gss	Glutathione synthetase
Gstt2	Glutathione S-transferase, theta 2
H6pd	Hexose-6-phosphate dehydrogenase
Hamp	Hepcidin antimicrobial peptide
Hck	Hemopoietic cell kinase
Hcrtr1	Hypocretin receptor 1
Hdac4	PREDICTED: histone deacetylase 4
Heatr1	HEAT repeat containing 1
Herc4	HECT and RLD domain containing E3 ubiquitin protein ligase 4
Hgf	PREDICTED: hepatocyte growth factor
Hhex	Hematopoietically expressed homeobox
Hipk1	Homeodomain interacting protein kinase 1
Hipk3	Homeodomain interacting protein kinase 3
Hist1h2bo	Histone cluster 1, H2bo
Hivep2	Human immunodeficiency virus type I enhancer binding protein 2
Hmox1	Heme oxygenase 1
Hnrnpa1	Heterogeneous nuclear ribonucleoprotein A1
Homer3	Homer scaffolding protein 3
Hpd	4-hydroxyphenylpyruvate dioxygenase
Hpgds	PREDICTED: hematopoietic prostaglandin D synthase
Hs3st1	Heparan sulfate -glucosamine 3-sulfotransferase 1
Hsd11b1	Hydroxysteroid 11-beta dehydrogenase 1
Hspb1	Heat shock protein B1
Hspb9	Heat shock protein, alpha-crystallin-related, B9
Iffo1	Intermediate filament family orphan 1
Ifitm1	Interferon induced transmembrane protein 1
Ifitm2	Interferon induced transmembrane protein 2
Ift122	Intraflagellar transport 122 homolog
Igf1r	Insulin-like growth factor 1 receptor
Igsf6	Immunoglobulin superfamily, member 6
Ikzf5	IKAROS family zinc finger 5
Il10	Interleukin 10
Il13ra1	Interleukin 13 receptor, alpha 1
Il17ra	Interleukin 17 receptor A
Il18	Interleukin 18
Il1r1	Interleukin 1 receptor, type I
Il1r2	Interleukin 1 receptor, type II
Il1rn	Interleukin 1 receptor antagonist
Il23a	Interleukin 23, alpha subunit p19
Il6r	Interleukin 6 receptor
Il6st	Interleukin 6 signal transducer
Ilf3	PREDICTED: interleukin enhancer binding factor 3
Impdh2	IMP (inosine 5'-monophosphate) dehydrogenase 2
Inhbb	Inhibin beta-B
Inpp1	Inositol polyphosphate-1-phosphatase
Inpp4b	Inositol polyphosphate-4-phosphatase, type II
Inpp5d	Inositol polyphosphate-5-phosphatase D
Insr	Insulin receptor
Ipo4	Importin 4
Ippk	PREDICTED: inositol 1,3,4,5,6-pentakisphosphate 2-kinase
Irak3	Interleukin-1 receptor-associated kinase 3
Itga2	PREDICTED: integrin, alpha 2
Itga9	PREDICTED: integrin, alpha 9
Itgam	Integrin, alpha M
Itgb2	Integrin, beta 2
Itgb8	PREDICTED: integrin, beta 8
Jade2	Jade family PHD finger 2
Jak2	Janus kinase 2
Jak3	Janus kinase 3
Jam2	Junctional adhesion molecule 2
Jmjd1c	Jumonji domain containing 1C
Kalrn	Kalirin, RhoGEF kinase
Kank1	KN motif and ankyrin repeat domains 1
Kcnab2	PREDICTED: potassium voltage-gated channel, shaker-related subfamily, beta member 2
Kcnk1	Potassium channel, two pore domain subfamily K, member 1
Kcnmb4	Potassium channel subfamily M regulatory beta subunit 4
Kcnq4	PREDICTED: potassium voltage-gated channel, KQT-like subfamily, member 4
Kcnt1	PREDICTED: potassium channel, subfamily T, member 1
Kdm3b	PREDICTED: lysine (K)-specific demethylase 3B
Kdsr	3-ketodihydrosphingosine reductase
Khk	Ketohexokinase
Kit	V-kit Hardy-Zuckerman 4 feline sarcoma viral oncogene homolog
Klhl40	Kelch-like family member 40
Klhl8	Kelch-like family member 8
Kpna6	Karyopherin alpha 6
Krt33a	Keratin 33A
Lama5	Laminin, alpha 5
Lbhd1	LBH domain containing 1
Lbp	Lipopolysaccharide binding protein
Lce1f	Late cornified envelope 1F
Lcn2	Lipocalin 2
Ldlrad4	Low density lipoprotein receptor class A domain containing 4
Lgals8	Lectin, galactoside-binding, soluble, 8
Lgalsl	Lectin, galactoside-binding-like
Lgr6	PREDICTED: leucine-rich repeat-containing G protein-coupled receptor 6
Lhfp	PREDICTED: lipoma HMGIC fusion partner
Lilrb4	Leukocyte immunoglobulin-like receptor, subfamily B, member 4
Lmbr1l	PREDICTED: limb region 1 like
Lnx2	Ligand of numb-protein X 2
LOC100158225	Hypothetical protein LOC100158225
LOC100360087	PREDICTED: ferritin light chain 1-like
LOC100360606	PREDICTED: zinc finger, RAN-binding domain containing 1 protein-like
LOC100909406	PREDICTED: uncharacterized LOC100909406
LOC100909675	Uncharacterized LOC100909675
LOC100909970	Uncharacterized LOC100909970
LOC100910056	PREDICTED: UHRF1-binding protein 1-like
LOC100910069	PREDICTED: uncharacterized LOC100910069
LOC100910385	PREDICTED: peroxisomal acyl-coenzyme A oxidase 1-like
LOC100910623	PREDICTED: uncharacterized LOC100910623
LOC100910669	PREDICTED: paired immunoglobulin-like type 2 receptor alpha-like
LOC100910797	PREDICTED: uncharacterized LOC100910797
LOC100910801	PREDICTED: paired immunoglobulin-like type 2 receptor alpha-like
LOC100910826	EST295046 Normalized rat embryo, Bento Soares Rattus sp. cDNA clone RGICC77 5' end sequence
LOC100910970	PREDICTED: uncharacterized LOC100910970
LOC100911266	PREDICTED: uncharacterized LOC100911266
LOC100911413	PREDICTED: deleted in malignant brain tumors 1 protein-like
LOC100911911	PREDICTED: CAP-Gly domain-containing linker protein 3-like
LOC100912031	PREDICTED: uncharacterized LOC100912031
LOC100912193	PREDICTED: uncharacterized LOC100912193
LOC100912247	PREDICTED: uncharacterized LOC100912247
LOC100912569	PREDICTED: uncharacterized LOC100912569
LOC100912731	PREDICTED: zinc finger protein 120-like
LOC100912991	PREDICTED: uncharacterized LOC100912991
LOC102546414	PREDICTED: uncharacterized LOC102546414
LOC102546497	PREDICTED: uncharacterized LOC102546497
LOC102546698	PREDICTED: uncharacterized LOC102546698
LOC102546902	PREDICTED: protein sidekick-1-like
LOC102546966	PREDICTED: uncharacterized LOC102546966
LOC102546992	PREDICTED: uncharacterized LOC102546992
LOC102547047	PREDICTED: uncharacterized LOC102547047
LOC102547513	PREDICTED: uncharacterized LOC102547513
LOC102547522	PREDICTED: uncharacterized LOC102547522
LOC102547802	PREDICTED: uncharacterized LOC102547802
LOC102548193	PREDICTED: uncharacterized LOC102548193
LOC102548719	PREDICTED: uncharacterized LOC102548719
LOC102548758	PREDICTED: uncharacterized LOC102548758
LOC102548772	PREDICTED: uncharacterized LOC102548772
LOC102548818	PREDICTED: uncharacterized LOC102548818
LOC102549001	PREDICTED: zinc finger protein 845-like
LOC102549144	PREDICTED: uncharacterized LOC102549144
LOC102549227	PREDICTED: uncharacterized LOC102549227
LOC102549305	PREDICTED: uncharacterized LOC102549305
LOC102549528	PREDICTED: uncharacterized LOC102549528
LOC102549542	PREDICTED: elongation of very long chain fatty acids protein 6-like
LOC102549726	Uncharacterized LOC102549726
LOC102550090	PREDICTED: uncharacterized LOC102550090
LOC102550100	PREDICTED: uncharacterized LOC102550100
LOC102550168	PREDICTED: uncharacterized LOC102550168
LOC102550182	PREDICTED: uncharacterized LOC102550182
LOC102550554	PREDICTED: uncharacterized LOC102550554
LOC102550584	PREDICTED: hornerin-like
LOC102550708	PREDICTED: keratin-associated protein 19-3-like
LOC102550745	PREDICTED: uncharacterized LOC102550745
LOC102550824	PREDICTED: uncharacterized LOC102550824
LOC102551052	PREDICTED: uncharacterized LOC102551052
LOC102551142	PREDICTED: uncharacterized LOC102551142
LOC102551360	PREDICTED: uncharacterized LOC102551360
LOC102551374	PREDICTED: uncharacterized LOC102551374
LOC102552250	PREDICTED: uncharacterized LOC102552250
LOC102552343	PREDICTED: uncharacterized LOC102552343
LOC102552369	PREDICTED: uncharacterized LOC102552369
LOC102552601	PREDICTED: uncharacterized LOC102552601
LOC102552603	PREDICTED: eukaryotic translation initiation factor 4B-like
LOC102552667	PREDICTED: 40S ribosomal protein S27-like
LOC102552817	PREDICTED: uncharacterized LOC102552817
LOC102552818	PREDICTED: uncharacterized LOC102552818
LOC102553109	PREDICTED: uncharacterized LOC102553109
LOC102553394	PREDICTED: uncharacterized LOC102553394
LOC102553541	PREDICTED: uncharacterized LOC102553541
LOC102554191	PREDICTED: uncharacterized LOC102554191
LOC102554494	PREDICTED: uncharacterized LOC102554494
LOC102554507	PREDICTED: uncharacterized LOC102554507
LOC102554570	PREDICTED: uncharacterized LOC102554570
LOC102554727	PREDICTED: uncharacterized LOC102554727
LOC102554748	PREDICTED: nidogen-2-like
LOC102555426	PREDICTED: uncharacterized LOC102555426
LOC102555570	PREDICTED: uncharacterized LOC102555570
LOC102556004	PREDICTED: uncharacterized LOC102556004
LOC102556115	PREDICTED: uncharacterized LOC102556115
LOC102556346	PREDICTED: angiotensin-converting enzyme-like
LOC102556488	PREDICTED: uncharacterized LOC102556488
LOC102556672	PREDICTED: igE-binding protein-like
LOC102556969	PREDICTED: uncharacterized LOC102556969
LOC102557520	PREDICTED: uncharacterized LOC102557520
LOC102557539	PREDICTED: uncharacterized LOC102557539
LOC103689954	PREDICTED: ectonucleoside triphosphate diphosphohydrolase 1
LOC103690020	PREDICTED: platelet glycoprotein 4-like
LOC103690154	PREDICTED: transcription regulator protein BACH1-like
LOC103690369	PREDICTED: leukocyte immunoglobulin-like receptor subfamily B member 4
LOC103690382	PREDICTED: T-cell activation Rho GTPase-activating protein-like
LOC103690397	PREDICTED: uncharacterized LOC103690397
LOC103690446	PREDICTED: uncharacterized LOC103690446
LOC103690500	PREDICTED: uncharacterized LOC103690500
LOC103690627	PREDICTED: uncharacterized LOC103690627
LOC103690680	PREDICTED: uncharacterized LOC103690680
LOC103690698	PREDICTED: uncharacterized LOC103690698
LOC103690705	PREDICTED: uncharacterized LOC103690705
LOC103690809	PREDICTED: uncharacterized LOC103690809
LOC103691017	PREDICTED: uncharacterized LOC103691017
LOC103691051	PREDICTED: uncharacterized LOC103691051
LOC103691063	PREDICTED: igE-binding protein-like
LOC103691159	PREDICTED: uncharacterized LOC103691159
LOC103691165	PREDICTED: uncharacterized LOC103691165
LOC103691253	PREDICTED: uncharacterized LOC103691253
LOC103691333	PREDICTED: uncharacterized LOC103691333
LOC103691381	PREDICTED: uncharacterized LOC103691381
LOC103691580	PREDICTED: uncharacterized LOC103691580
LOC103691812	PREDICTED: formin-like protein 14
LOC103691924	PREDICTED: uncharacterized LOC103691924
LOC103692385	PREDICTED: receptor-type tyrosine-protein phosphatase delta-like
LOC103692427	PREDICTED: uncharacterized LOC103692427
LOC103692550	PREDICTED: uncharacterized LOC103692550
LOC103692572	PREDICTED: uncharacterized LOC103692572
LOC103692726	PREDICTED: keratin-associated protein 5-9-like
LOC103692821	PREDICTED: uncharacterized LOC103692821
LOC103692928	PREDICTED: uncharacterized LOC103692928
LOC103692929	PREDICTED: uncharacterized LOC103692929
LOC103693015	PREDICTED: vitamin K epoxide reductase complex subunit 1-like protein 1
LOC103693100	PREDICTED: uncharacterized LOC103693100
LOC103693414	PREDICTED: uncharacterized LOC103693414
LOC103693587	PREDICTED: uncharacterized LOC103693587
LOC103693630	PREDICTED: paired immunoglobulin-like type 2 receptor beta
LOC103693713	PREDICTED: uncharacterized LOC103693713
LOC103693804	PREDICTED: uncharacterized LOC103693804
LOC103693866	PREDICTED: uncharacterized LOC103693866
LOC103693914	PREDICTED: uncharacterized LOC103693914
LOC103694005	PREDICTED: uncharacterized LOC103694005
LOC103694130	PREDICTED: uncharacterized LOC103694130
LOC103694141	PREDICTED: uncharacterized LOC103694141
LOC103694172	PREDICTED: uncharacterized LOC103694172
LOC103694288	PREDICTED: uncharacterized LOC103694288
LOC103694501	PREDICTED: uncharacterized LOC103694501
LOC103694914	PREDICTED: uncharacterized LOC103694914
LOC103695048	PREDICTED: uncharacterized LOC103695048
LOC103695101	PREDICTED: uncharacterized LOC103695101
LOC103695148	PREDICTED: uncharacterized LOC103695148
LOC103695224	PREDICTED: uncharacterized LOC103695224
LOC103695225	PREDICTED: transcriptional enhancer factor TEF-3-like
LOC291863	Carboxylesterase-like
LOC308990	Hypothetical protein LOC308990
LOC316124	Similar to gonadotropin-regulated long chain acyl-CoA synthetase
LOC363208	PREDICTED: similar to Heterogeneous nuclear ribonucleoprotein A1
LOC498276	Fc gamma receptor II beta
LOC499339	Hypothetical protein LOC499339
LOC499770	Similar to LOC495800 protein
LOC500881	PREDICTED: similar to nucleolar protein 1
LOC501230	PREDICTED: similar to nidogen 2
LOC678766	PREDICTED: similar to ras homolog gene family, member U
LOC679581	PREDICTED: hypothetical protein LOC679581
LOC680910	PREDICTED: similar to paired immunoglobin-like type 2 receptor beta
LOC680933	PREDICTED: similar to nidogen 2
LOC681177	PREDICTED: rho GTPase-activating protein 20-like
LOC681182	PREDICTED: similar to paired immunoglobin-like type 2 receptor beta
LOC681186	PREDICTED: hypothetical protein LOC681186
LOC685157	Similar to paired immunoglobin-like type 2 receptor beta
LOC685181	PREDICTED: similar to paired immunoglobin-like type 2 receptor beta
LOC688126	PREDICTED: hypothetical protein LOC688126
LOC688415	PREDICTED: similar to pescadillo homolog 1, containing BRCT domain
LOC689519	PREDICTED: similar to Transcriptional enhancer factor TEF-3
LOC689757	Similar to osteoclast inhibitory lectin
LOC689770	Similar to osteoclast inhibitory lectin
LOC689959	Hypothetical protein LOC689959
LOC691141	Hypothetical protein LOC691141
Lonrf3	LON peptidase N-terminal domain and ring finger 3
Lox	Lysyl oxidase
Lpar6	Lysophosphatidic acid receptor 6
Lpin2	Lipin 2
Lppr2	Lipid phosphate phosphatase-related protein type 2
Lrat	Lecithin-retinol acyltransferase
Lrch1	Leucine-rich repeats and calponin homology
Lrp1	Low density lipoprotein receptor-related protein 1
Lrrc2	Leucine rich repeat containing 2
Lrrc25	PREDICTED: leucine rich repeat containing 25
Lrrc75a	PREDICTED: leucine rich repeat containing 75A
Lsm8	LSM8 homolog, U6 small nuclear RNA associated
Lst1	Leukocyte specific transcript 1
Lyl1	Lymphoblastic leukemia associated hematopoiesis regulator 1
Lyn	LYN proto-oncogene, Src family tyrosine kinase
Lyst	Lysosomal trafficking regulator
Lyz2	Lysozyme 2
Mafb	V-maf avian musculoaponeurotic fibrosarcoma oncogene homolog B
Man1a1	Mannosidase, alpha, class 1A, member 1
Map1lc3b	Microtubule-associated protein 1 light chain 3 beta
Map3k6	Mitogen-activated protein kinase kinase kinase 6
Map7	Microtubule-associated protein 7
Mapk14	P38 mitogen activated protein kinase mRNA, complete cds.
Mapkapk2	Mitogen-activated protein kinase-activated protein kinase 2
Mapre2	Microtubule-associated protein, RP/EB family, member 2
Mark1	MAP/microtubule affinity-regulating kinase 1
Max	MYC associated factor X
Mcm4	Minichromosome maintenance complex component 4
Mecp2	Methyl CpG binding protein 2
Med13l	PREDICTED: mediator complex subunit 13-like
Met	PREDICTED: MET proto-oncogene, receptor tyrosine kinase
Mfap3l	Microfibrillar-associated protein 3-like
Mgat5	Mannosyl
Mgst1	Microsomal glutathione S-transferase 1
Mgst2	Microsomal glutathione S-transferase 2
Mib1	Mindbomb E3 ubiquitin protein ligase 1
Mical3	Microtubule associated monoxygenase, calponin and LIM domain containing 3
Mid1	PREDICTED: midline 1
Mme	Membrane metallo-endopeptidase
Mmp14	Matrix metallopeptidase 14
Mmp24	Matrix metallopeptidase 24
Mocs1	Molybdenum cofactor synthesis 1
Mpg	N-methylpurine-DNA glycosylase
Mphosph10	M-phase phosphoprotein 10
Mrgprx3	MAS-related GPR, member X3
Mrto4	MRNA turnover 4 homolog
Ms4a6a	PREDICTED: membrane-spanning 4-domains, subfamily A, member 6A
Msantd3	Myb/SANT-like DNA-binding domain containing 3
Msh5	MutS homolog 5
Msr1	Macrophage scavenger receptor 1
Mt1a	Metallothionein 1a
Mt2A	Metallothionein 2A
Mthfd1l	Methylenetetrahydrofolate dehydrogenase (NADP+ dependent) 1-like
Mthfd2	Methylenetetrahydrofolate dehydrogenase
Mtr	5-methyltetrahydrofolate-homocysteine methyltransferase
Mturn	Maturin, neural progenitor differentiation regulator homolog
Mtus2	Microtubule associated tumor suppressor candidate 2
Mxd1	Max dimerization protein 1
Mybbp1a	MYB binding protein
Mybph	Myosin binding protein H
Myd88	Myeloid differentiation primary response 88
Mynn	Myoneurin
Myot	Myotilin
Mypn	Myopalladin
Mzt2b	Mitotic spindle organizing protein 2B
N4bp2l1	NEDD4 binding protein 2-like 1
N4bp2l2	NEDD4 binding protein 2-like 2
Nap1l1	Nucleosome assembly protein 1-like 1
Nap1l5	Nucleosome assembly protein 1-like 5
Nasp	Nuclear autoantigenic sperm protein
Nat9	PREDICTED: N-acetyltransferase 9
Nbr1	Neighbor of Brca1 gene 1
Ncf4	Neutrophil cytosolic factor 4
Ncl	Nucleolin
Nedd4l	Neural precursor cell expressed, developmentally down-regulated 4-like, E3 ubiquitin protein ligase
Nek6	NIMA-related kinase 6
Nek7	NIMA-related kinase 7
Net1	Neuroepithelial cell transforming 1
Nfe2l2	Nuclear factor, erythroid 2-like 2
Nfx1	Nuclear transcription factor, X-box binding 1
Nip7	NIP7, nucleolar pre-rRNA processing protein
Nipsnap3b	Nipsnap homolog 3B
Nisch	PREDICTED: nischarin
Nkd1	Naked cuticle homolog 1
Nle1	Notchless homolog 1
Nob1	NIN1/RPN12 binding protein 1 homolog
Nol3	Nucleolar protein 3
Nol8	Nucleolar protein 8
Nop16	NOP16 nucleolar protein
Nop2	NOP2 nucleolar protein
Nop58	NOP58 ribonucleoprotein
Nos1ap	Nitric oxide synthase 1
Npl	N-acetylneuraminate pyruvate lyase
Npm1	Nucleophosmin
Nqo1	NAD
Nr1i2	Nuclear receptor subfamily 1, group I, member 2
Nr2c2ap	Nuclear receptor 2C2-associated protein
Nr2f2	PREDICTED: nuclear receptor subfamily 2, group F, member 2
Nr6a1	PREDICTED: nuclear receptor subfamily 6, group A, member 1
Nsg2	Neuron specific gene family member 2
Ntf3	Neurotrophin 3
Nubpl	Nucleotide binding protein-like
Nucb1	Nucleobindin 1
Nucb2	Nucleobindin 2
Nucks1	Nuclear casein kinase and cyclin-dependent kinase substrate 1
Nudt21	Nudix
Nudt4	Nudix
Nup88	Nucleoporin 88
Nup93	Nucleoporin 93
Nxt1	Nuclear transport factor 2-like export factor 1
Odf2	Outer dense fiber of sperm tails 2
Odf3l1	Outer dense fiber of sperm tails 3-like 1
Ogfrl1	PREDICTED: opioid growth factor receptor-like 1
Orc3	Origin recognition complex, subunit 3
Orm1	Orosomucoid 1
Otud3	OTU deubiquitinase 3
Otud7b	OTU deubiquitinase 7B
Otulin	OTU deubiquitinase with linear linkage specificity
P2ry6	Pyrimidinergic receptor P2Y, G-protein coupled, 6
Pa2g4	Proliferation-associated 2G4
Pabpc1	Poly (A) binding protein, cytoplasmic 1-like
Pabpc1-ps1	PREDICTED: Poly (A) binding protein, cytoplasmic 1-like
Pafah2	PREDICTED: platelet-activating factor acetylhydrolase 2
Pak6	PREDICTED: p21 (RAC1) activated kinase 6
Paox	Polyamine oxidase
Pard3	PREDICTED: par-3 family cell polarity regulator
Parvg	Parvin, gamma
Pbdc1	Polysaccharide biosynthesis domain containing 1
Pcdh20	Protocadherin 20
Pcgf6	Polycomb group ring finger 6
Pcsk5	Proprotein convertase subtilisin/kexin type 5
Pctp	Phosphatidylcholine transfer protein
Pdcd6ip	Programmed cell death 6 interacting protein
Pde10a	Phosphodiesterase 10A
Pde4b	Phosphodiesterase 4B, cAMP specific
Pdk4	Pyruvate dehydrogenase kinase, isozyme 4
Pdlim1	PDZ and LIM domain 1
Pdlim2	PDZ and LIM domain 2
Pdlim3	PDZ and LIM domain 3
Pdlim5	PREDICTED: PDZ and LIM domain 5
Peg12	Paternally expressed 12
Pgrmc2	Progesterone receptor membrane component 2
Phactr2	Phosphatase and actin regulator 2
Phyhd1	Phytanoyl-CoA dioxygenase domain containing 1
Pi15	Peptidase inhibitor 15
Pir	Pirin (iron-binding nuclear protein)
Pknox1	PREDICTED: PBX/knotted 1 homeobox 1
Pla1a	Phospholipase A1 member A
Pla2g2a	Phospholipase A2, group IIA
Pla2g4a	Phospholipase A2, group IVA
Plb1	Phospholipase B1
Plcb3	PREDICTED: phospholipase C, beta 3
Pld3	Phospholipase D family, member 3
Pld6	PREDICTED: phospholipase D family, member 6
Plekhm1	Pleckstrin homology domain containing, family M
Plscr1	Phospholipid scramblase 1
Pnpla7	Patatin-like phospholipase domain containing 7
Polr1e	RNA polymerase I subunit E
Polr3g	RNA polymerase I subunit G
Pop1	Processing of precursor 1, ribonuclease P/MRP subunit
Ppan	Peter pan homolog
Ppfia1	Protein tyrosine phosphatase, receptor type, f polypeptide
Ppfibp1	PTPRF interacting protein, binding protein 1 (liprin beta 1)
Ppm1n	Protein phosphatase, Mg2+/Mn2+ dependent, 1N
Ppp1cb	Protein phosphatase 1, catalytic subunit, beta isozyme
Ppp4r1	Protein phosphatase 4, regulatory subunit 1
Pqbp1	Polyglutamine binding protein 1
Prepl	Prolyl endopeptidase-like
Prg4	Proteoglycan 4
Prickle2	Prickle homolog 2
Prmt8	Protein arginine methyltransferase 8
Prpf3	Pre-mRNA processing factor 3
Prr13	Proline rich 13
Prr16	Proline rich 16
Prrg1	PREDICTED: proline rich Gla
Psat1	Phosphoserine aminotransferase 1
Psmd11	PREDICTED: proteasome
Psmd8	Proteasome
Psph	Phosphoserine phosphatase
Pstpip1	Proline-serine-threonine phosphatase-interacting protein 1
Ptges	Prostaglandin E synthase
Ptpn12	Protein tyrosine phosphatase, non-receptor type 12
Ptpn14	Protein tyrosine phosphatase, non-receptor type 14
Ptpn2	Protein tyrosine phosphatase, non-receptor type 2
Ptpn6	Protein tyrosine phosphatase, non-receptor type 6
Ptprb	PREDICTED: protein tyrosine phosphatase, receptor type, B
Ptprd	PREDICTED: protein tyrosine phosphatase, receptor type, D
Ptprf	Protein tyrosine phosphatase, receptor type, F
Ptprk	Protein tyrosine phosphatase, receptor type, K
Ptprn	Protein tyrosine phosphatase, receptor type, N
Ptprr	Protein tyrosine phosphatase, receptor type, R
Pus3	Pseudouridylate synthase 3
Pus7l	PREDICTED: pseudouridylate synthase 7 homolog
Pwp2	PWP2 periodic tryptophan protein homolog
Pxk	PX domain containing serine/threonine kinase
R3hcc1l	PREDICTED: R3H domain and coiled-coil containing 1-like
Rab11fip1	RAB11 family interacting protein 1
Rab11fip3	LRRGT00043 mRNA, complete cds.
Rab30	PREDICTED: RAB30, member RAS oncogene family
Rac1	Ras-related C3 botulinum toxin substrate 1
Rac2	Ras-related C3 botulinum toxin substrate 2
Ramp3	Receptor activity modifying protein 3
Rap1a	RAP1A, member of RAS oncogene family
Rasgef1c	RasGEF domain family, member 1C
Rbm3	RNA binding motif
Rbm47	PREDICTED: RNA binding motif protein 47
Rbp4	Retinol binding protein 4, plasma
Rc3h1	PREDICTED: ring finger and CCCH-type domains 1
Rcl1	RNA terminal phosphate cyclase-like 1
Rd3l	Retinal degeneration 3-like
Rdh10	Retinol dehydrogenase 10
Rec8	REC8 meiotic recombination protein
Reep2	Receptor accessory protein 2
Reg3a	Regenerating islet-derived 3 alpha
Reg3b	Regenerating islet-derived 3 beta
Reg3g	Regenerating islet-derived 3 gamma
Rfx3	PREDICTED: regulatory factor X, 3 (influences HLA class II expression)
RGD1304963	PREDICTED: similar to hypothetical protein MGC38716
RGD1305422	PREDICTED: similar to mKIAA0226 protein
RGD1305455	Similar to hypothetical protein FLJ10925
RGD1311458	Similar to cDNA sequence BC027231; hypothetical protein MGC27931
RGD1311747	Similar to 2700029M09Rik protein
RGD1311756	Similar to hypothetical protein FLJ20950
RGD1560281	PREDICTED: similar to cell surface receptor FDFACT
RGD1560986	PREDICTED: similar to Gene model 1082
RGD1561149	Similar to mKIAA1522 protein
RGD1562525	PREDICTED: similar to cell surface receptor FDFACT
RGD1563222	Similar to RIKEN cDNA A930018P22
RGD1563365	Similar to DNA segment, Chr 10, Wayne State University 102, expressed
RGD1564664	Similar to LOC387763 protein
RGD1564786	PREDICTED: similar to OTTMUSP00000000636
RGD1565959	RGD1565959
RGD1566006	PREDICTED: similar to paired immunoglobin-like type 2 receptor beta
RGD621098	Similar to RIKEN cDNA D230025D16Rik
Rhobtb1	Rho-related BTB domain containing 1
Rit1	Ras-like without CAAX 1
Rlim	Ring finger protein, LIM domain interacting
Rnf111	Ring finger protein 111
Rnf125	Ring finger protein 125, E3 ubiquitin protein ligase
Rnf144b	Ring finger protein 144B
Rnf38	Ring finger protein 38
Rnf39	Ring finger protein 39
Ror1	Receptor tyrosine kinase-like orphan receptor 1
Rpl10a	Ribosomal protein L10A
Rpl3	Ribosomal protein L3
Rpl7a	Ribosomal protein L7a
Rps12	Ribosomal protein S12
Rps6	Ribosomal protein S6
Rps6ka3	Ribosomal protein S6 kinase polypeptide 3
Rps6ka5	Ribosomal protein S6 kinase, polypeptide 5
Rps9	Ribosomal protein S9
Rrp9	Ribosomal RNA processing 9, small subunit
Rsph1	Radial spoke head 1 homolog
Rsph10b	Radial spoke head 10 homolog B
RT1-DMa	RT1 class II, locus DMa
S100a8	S100 calcium binding protein A8
S100a9	S100 calcium binding protein A9
Saal1	PREDICTED: serum amyloid A-like 1
Sap30bp	SAP30 binding protein
Sbno2	Strawberry notch homolog 2
Scamp1	Secretory carrier membrane protein 1
Scgb2a2	Secretoglobin, family 2A, member 2
Scn3a	PREDICTED: sodium channel, voltage-gated, type III, alpha
Scnn1a	Sodium channel, non-voltage-gated 1 alpha subunit
Scp2	Sterol carrier protein 2
Sdk1	PREDICTED: sidekick cell adhesion molecule 1
Sec16b	SEC16 homolog B
Sec23ip	SEC23 interacting protein
Sectm1b	Secreted and transmembrane 1B
Sema3a	Sema domain, immunoglobulin domain
Sema3f	Sema domain, immunoglobulin domain
Sema6b	Sema domain, transmembrane domain
Serpina3n	Serine (or cysteine) peptidase inhibitor, clade A, member 3N
Serpina5	Serpin peptidase inhibitor, clade A (alpha-1 antiproteinase, antitrypsin), member 5
Serping1	Serpin peptidase inhibitor, clade G
Set	SET nuclear proto-oncogene
Setl1	SET translocation-like 1
Sf1	Splicing factor 1
Sfmbt2	PREDICTED: Scm-like with four mbt domains 2
Sfrp1	Secreted frizzled-related protein 1
Sgms1	Sphingomyelin synthase 1
Sgpl1	Sphingosine-1-phosphate lyase 1
Sgsm3	Small G protein signaling modulator 3
Sh3pxd2b	PREDICTED: SH3 and PX domains 2B
Shc1	SHC
Shmt1	Serine hydroxymethyltransferase 1
Shroom3	Shroom family member 3
Sidt2	SID1 transmembrane family, member 2
Siglec5	Sialic acid binding Ig-like lectin 5
Sik3	SIK family kinase 3
Sirpa	Signal-regulatory protein alpha
Slamf9	SLAM family member 9
Slc10a6	Solute carrier family 10
Slc11a1	Solute carrier family 11
Slc11a2	Solute carrier family 11
Slc12a9	Solute carrier family 12, member 9
Slc13a3	Solute carrier family 13
Slc1a1	Solute carrier family 1
Slc1a5	Solute carrier family 1
Slc25a14	Solute carrier family 25
Slc25a37	Solute carrier family 25
Slc28a2	Solute carrier family 28
Slc2a3	PREDICTED: solute carrier family 2
Slc30a7	Solute carrier family 30
Slc35f6	Solute carrier family 35, member F6
Slc39a1	Solute carrier family 39
Slc39a14	Solute carrier family 39
Slc39a6	Solute carrier family 39
Slc3a2	Solute carrier family 3
Slc43a2	Solute carrier family 43
Slc43a3	Solute carrier family 43, member 3
Slc44a2	Solute carrier family 44 (choline transporter), member 2
Slc6a9	Solute carrier family 6
Slc7a5	Solute carrier family 7
Slc7a6	Solute carrier family 7
Slc7a8	Solute carrier family 7
Slc9a3r1	Solute carrier family 9, subfamily A
Slco2a1	PREDICTED: solute carrier organic anion transporter family, member 2a1
Slpi	Secretory leukocyte peptidase inhibitor
Slpil2	Antileukoproteinase-like 2
Slpil3	Antileukoproteinase-like 3
Smad1	SMAD family member 1
Smad3	SMAD family member 3
Smek1	SMEK homolog 1, suppressor of mek1
Smg6	SMG6 nonsense mediated mRNA decay factor
Smim14	Small integral membrane protein 14
Smpdl3b	Sphingomyelin phosphodiesterase, acid-like 3B
Snrnp70	Small nuclear ribonucleoprotein 70
Snx29	PREDICTED: sorting nexin 29
Sorbs3	Sorbin and SH3 domain containing 3
Sort1	Sortilin 1
Spata6l	Spermatogenesis associated 6-like
Spdya	Speedy/RINGO cell cycle regulator family member A
Spidr	Scaffolding protein involved in DNA repair
Spire1	Spire-type actin nucleation factor 1
Spon1	Spondin 1, extracellular matrix protein
Spred3	PREDICTED: sprouty-related, EVH1 domain containing 3
Sprr1a	Small proline-rich protein 1A
Spryd7	SPRY domain containing 7
Spsb1	PREDICTED: splA/ryanodine receptor domain and SOCS box containing 1
Sptbn4	Spectrin, beta, non-erythrocytic 4
Sptlc2	Serine palmitoyltransferase, long chain base subunit 2
Sqrdl	Sulfide quinone reductase-like
Sqstm1	Sequestosome 1
Srm	Spermidine synthase
Ssh2	PREDICTED: slingshot protein phosphatase 2
Sstr1	Somatostatin receptor 1
St3gal1	PREDICTED: ST3 beta-galactoside alpha-2,3-sialyltransferase 1
Stard5	StAR-related lipid transfer
Stat3	Signal transducer and activator of transcription 3
Steap4	STEAP family member 4
Stk10	Serine/threonine kinase 10
Stk38l	Serine/threonine kinase 38 like
Stt3b	STT3B, subunit of the oligosaccharyltransferase complex
Stxbp2	Syntaxin binding protein 2
Sugp1	SURP and G patch domain containing 1
Sulf1	Sulfatase 1
Susd6	PREDICTED: similar to Protein KIAA0247 precursor
Suv39h1	Suppressor of variegation 3-9 homolog 1
Svep1	PREDICTED: sushi, von Willebrand factor type A, EGF and pentraxin domain containing 1
Syk	Spleen tyrosine kinase
Syt12	Synaptotagmin XII
Taf1d	TATA box binding protein
Tars	Threonyl-tRNA synthetase
Tbc1d15	PREDICTED: TBC1 domain family, member 15
Tbc1d17	TBC1 domain family, member 17
Tbc1d2	TBC1 domain family, member 2
Tbc1d2b	TBC1 domain family, member 2B
Tbkbp1	TBK1 binding protein 1
Tbl1xr1	Transducin (beta)-like 1 X-linked receptor 1
Tbl3	Transducin (beta)-like 3
Tbx20	PREDICTED: T-box 20
Tbxas1	Thromboxane A synthase 1, platelet
Tcf20	Transcription factor 20
Tcf21	Transcription factor 21
Tead1	PREDICTED: TEA domain family member 1
Tead3	TEA domain family member 3
Tead4	PREDICTED: TEA domain family member 4
Tec	Tec protein tyrosine kinase
Tectb	Tectorin beta
Tgfbr2	Transforming growth factor, beta receptor 2
Tgfbr3	Transforming growth factor, beta receptor III
Tgif1	TGFB-induced factor homeobox 1
Tgm1	Transglutaminase 1
Thrap3	Thyroid hormone receptor associated protein 3
Timp1	TIMP metallopeptidase inhibitor 1
Tinagl1	Tubulointerstitial nephritis antigen-like 1
Tlr1	Toll-like receptor 1
Tmbim1	Transmembrane BAX inhibitor motif containing 1
Tmcc3	Transmembrane and coiled-coil domain family 3
Tmem100	Transmembrane protein 100
Tmem2	Transmembrane protein 2
Tmem252	Transmembrane protein 252
Tmem57	Transmembrane protein 57
Tmem63a	Transmembrane protein 63a
Tmem63c	Transmembrane protein 63c
Tmtc1	PREDICTED: transmembrane and tetratricopeptide repeat containing 1
Tnfrsf1a	Tumor necrosis factor receptor superfamily, member 1a
Tnfrsf26	Tumor necrosis factor receptor superfamily, member 26
Tnrc6a	Trinucleotide repeat containing 6a
Tom1	Target of myb1
Top1	Topoisomerase
Tp53i3	PREDICTED: tumor protein p53 inducible protein 3
Tp53inp1	PREDICTED: tumor protein p53 inducible nuclear protein 1
Tpd52l2	Tumor protein D52-like 2
Tpm3	Tropomyosin 3
Tprn	Taperin
Trdn	Triadin
Trh	Thyrotropin releasing hormone
Trim25	Tripartite motif-containing 25
Trim54	Tripartite motif-containing 54
Trmt10a	PREDICTED: tRNA methyltransferase 10 homolog A
Trmt6	TRNA methyltransferase 6
Trpm7	Transient receptor potential cation channel, subfamily M, member 7
Tspan14	Tetraspanin 14
Tspan15	Tetraspanin 15
Ttc27	Tetratricopeptide repeat domain 27
Ttc9c	Tetratricopeptide repeat domain 9C
Tuba1c	Tubulin, alpha 1C
Tyrobp	Tyro protein tyrosine kinase binding protein
Ubald1	UBA-like domain containing 1
Ubald2	PREDICTED: UBA-like domain containing 2
Ubash3b	PREDICTED: ubiquitin associated and SH3 domain containing, B
Ube2g2	Ubiquitin-conjugating enzyme E2G 2
Ube4b	Ubiquitination factor E4B
Ubr4	Ubiquitin protein ligase E3 component n-recognin 4
Uck2	Uridine-cytidine kinase 2
Ugt1a6	UDP glucuronosyltransferase 1 family, polypeptide A6
Uhrf1bp1l	UHRF1 binding protein 1-like
Usp13	Ubiquitin specific peptidase 13
Utp3	UTP3, small subunit
Vamp8	Vesicle-associated membrane protein 8
Vapa	VAMP associated protein A
Vash1	PREDICTED: vasohibin 1
Vcpip1	Valosin containing protein
Vrk2	Vaccinia related kinase 2
Vwa5a	Von Willebrand factor A domain containing 5A
Wbp1l	WW domain binding protein 1-like
Wbscr22	Williams Beuren syndrome chromosome region 22
Wdr12	WD repeat domain 12
Wdr26	WD repeat domain 26
Wdr4	WD repeat domain 4
Wdr43	WD repeat domain 43
Wdr46	WD repeat domain 46
Wdr5	WD repeat domain 5
Wdr91	WD repeat domain 91
Wfdc21	WAP four-disulfide core domain 21
Wwtr1	WW domain containing transcription regulator 1
Xdh	Xanthine dehydrogenase
Xirp1	PREDICTED: xin actin-binding repeat-containing protein 1-like
XM_008763749	PREDICTED: sushi domain-containing protein 1-like
XR_008822	PREDICTED: interferon-induced transmembrane protein 2-like
XR_008910	PREDICTED: 40S ribosomal protein S7-like
XR_085980	PREDICTED: G2
Yme1l1	YME1-like 1 ATPase
Ypel3	Yippee-like 3
Ypel5	Yippee-like 5
Zak	PREDICTED: sterile alpha motif and leucine zipper containing kinase AZK
Zdhhc9	Zinc finger, DHHC-type containing 9
Zfp207	Zinc finger protein 207
Zfp217	PREDICTED: zinc finger protein 217
Zfp451	PREDICTED: zinc finger protein 451
Zfp521	Zinc finger protein 521
Zfp608	Zinc finger protein 608
Zfp874b	PREDICTED: zinc finger protein 874b
Zfyve27	Zinc finger, FYVE domain containing 27
Zhx2	PREDICTED: zinc fingers and homeoboxes 2
Zkscan5	Zinc finger with KRAB and SCAN domains 5
Zrsr1	Zinc finger (CCCH type), RNA binding motif and serine/arginine rich 1

## Sheet: Male Down in sepsis
List of the 1591 genes in male significantly down-regulated in CLP vs SHAM (SAM 2, FDR<0,01). The common genes between male and female are found in blue.
Gene	Description
AA957586	UI-R-E1-gb-a-07-0-UI.s1 UI-R-E1 cDNA clone UI-R-E1-gb-a-07-0-UI 3'sequence
AA998581	UI-R-C0-if-e-12-0-UI.s1 UI-R-C0 cDNA clone UI-R-C0-if-e-12-0-UI 3'sequence
Abca8a	ATP-binding cassette, subfamily A
Abca9	PREDICTED: ATP-binding cassette, subfamily A, member 9
Abcb9	ATP-binding cassette, subfamily B, member 9
Abcc8	ATP-binding cassette, subfamily C, member 8
Abcc9	ATP-binding cassette, subfamily C, member 9
Abcd1	ATP-binding cassette, subfamily D, member 1
Abcg3l1	ATP-binding cassette, subfamily G, member 3-like 1
Abcg4	ATP-binding cassette, subfamily G, member 4
Abhd14a	Abhydrolase domain containing 14A
Abhd16a	Abhydrolase domain containing 16A
Abhd8	Abhydrolase domain containing 8
Abi3bp	PREDICTED: ABI family, member 3
Ablim2	Actin binding LIM protein family, member 2
Acap1	ArfGAP with coiled-coil, ankyrin repeat and PH domains 1
Acot13	Acyl-CoA thioesterase 13
Acot7	Acyl-CoA thioesterase 7
Acsl1	Acyl-CoA synthetase long-chain family member 1
Acss1	Acyl-CoA synthetase short-chain family member 1
Actb	Actin, beta
Actc1	Actin, alpha, cardiac muscle 1
Adam19	ADAM metallopeptidase domain 19
Adam23	PREDICTED: ADAM metallopeptidase domain 23
Adamts10	Similar to a disintegrin-like and metalloprotease
Adamts17	PREDICTED: ADAM metallopeptidase with thrombospondin type 1 motif, 17
Adamts2	PREDICTED: ADAM metallopeptidase with thrombospondin type 1 motif, 2
Adamtsl4	ADAMTS-like 4
Adamtsl5	PREDICTED: ADAMTS-like 5
Adck1	AarF domain containing kinase 1
Adcyap1r1	Adenylate cyclase activating polypeptide 1 receptor type 1
Adprhl1	PREDICTED: ADP-ribosylhydrolase like 1
Adra1a	Adrenoceptor alpha 1A
Adra1b	Adrenoceptor alpha 1B
Adra1d	Adrenoceptor alpha 1D
AF030090	Activity and neurotransmitter-induced early gene 5
AF050659	Activity and neurotransmitter-induced early gene 7
Afap1	Actin filament associated protein 1
Afap1l1	Actin filament associated protein 1-like 1
Afap1l2	Actin filament associated protein 1-like 2
Ager	Advanced glycosylation end product-specific receptor
Agpat3	1-acylglycerol-3-phosphate O-acyltransferase 3
AI113137	UI-R-C2p-nr-h-02-0-UI.s1 UI-R-C2p cDNA clone UI-R-C2p-nr-h-02-0-UI 3'sequence
AI137712	UI-R-C0-ii-g-11-0-UI.s1 UI-R-C0 cDNA clone UI-R-C0-ii-g-11-0-UI 3'sequence
AI169255	EST215090 Normalized rat kidney, Bento Soares Rattus sp. cDNA clone RKIBP36 3' endsequence
Aifm1	Apoptosis-inducing factor, mitochondrion-associated 1
Ajuba	Ajuba LIM protein
Ak1	Adenylate kinase 1
Ak2	Adenylate kinase 2
Akap1	A kinase anchoring protein 1
Akap17b	PREDICTED: A kinase anchoring protein 17b
Akap3	A kinase anchoring protein 3
Akap6	A kinase anchoring protein 6
Alad	Aminolevulinate dehydratase
Alas1	5'-aminolevulinate synthase 1
Aldh1a3	Aldehyde dehydrogenase 1 family, member A3
Aldh3a1	Aldehyde dehydrogenase 3 family, member A1
Amph	Amphiphysin
Amz1	PREDICTED: archaelysin family metallopeptidase 1
Angpt1	PREDICTED: angiopoietin 1
Angptl2	Angiopoietin-like 2
Ankrd10	Ankyrin repeat domain 10
Ankrd34a	Ankyrin repeat domain 34A
Ankrd9	Ankyrin repeat domain 9
Anks1a	Ankyrin repeat and sterile alpha motif domain containing 1A
Anks4b	Ankyrin repeat and sterile alpha motif domain containing 4B
Antxr1	Anthrax toxin receptor 1
Anxa10	Annexin A10
Anxa5	Annexin A5
Aoc3	Amine oxidase, copper containing 3
Apba3	Amyloid beta
Apln	Apelin
Aplnr	Apelin receptor
Aplp2	Amyloid beta
Aprt	Adenine phosphoribosyl transferase
Ar	Androgen receptor
Arfgef3	PREDICTED: similar to mKIAA1244 protein
Arg1	Arginase 1
Arhgap20	Rho GTPase activating protein 20
Arhgap21	Rho GTPase activating protein 21
Arhgap28	PREDICTED: Rho GTPase activating protein 28
Arhgap29	PREDICTED: Rho GTPase activating protein 29
Arhgef6	PREDICTED: Rac/Cdc42 guanine nucleotide exchange factor
Arl13b	ADP-ribosylation factor-like 13B
Arl14ep	PREDICTED: ADP-ribosylation factor-like 14 effector protein
Arl15	PREDICTED: ADP-ribosylation factor-like 15
Arl16	PREDICTED: ADP-ribosylation factor-like 16
Arpc5l	Actin related protein 2/3 complex, subunit 5-like
Arsb	Arylsulfatase B
Arvcf	Armadillo repeat gene deleted in velo-cardio-facial syndrome
Asb15	PREDICTED: ankyrin repeat and SOCS box containing 15
Asb18	Ankyrin repeat and SOCS box-containing 18
Asb2	Ankyrin repeat and SOCS box-containing 2
Asgr2	Asialoglycoprotein receptor 2
Asph	PREDICTED: aspartate-beta-hydroxylase
Aspn	Asporin
Atat1	Alpha tubulin acetyltransferase 1
Atp10a	ATPase, class V, type 10A
Atp12a	ATPase, H+/K+ transporting, nongastric, alpha polypeptide
Atp1b1	ATPase, Na+/K+ transporting, beta 1 polypeptide
Atp2a3	ATPase, Ca++ transporting, ubiquitous
Atp2b2	ATPase, Ca++ transporting, plasma membrane 2
Atp5d	ATP synthase, H+ transporting, mitochondrial F1 complex, delta subunit
Atp5s	ATP synthase, H+ transporting, mitochondrial Fo complex, subunit s
Atp6v0a2	ATPase, H+ transporting, lysosomal V0 subunit A2
Atpaf1	ATP synthase mitochondrial F1 complex assembly factor 1
AW055727	ESTT2990722 Rat brain ESTs cDNA clone ESTT2990722 3'sequence
AW919096	EST350400 Rat gene index, normalized rat, norvegicus, Bento Soares cDNA clone RGIFC69 5' endsequence
Banf1	Barrier to autointegration factor 1
BC086424	CDNA clone IMAGE:7302039.
BC098867	CDNA clone IMAGE:7380769.
Bcam	Basal cell adhesion molecule
Bcl11b	B-cell CLL/lymphoma 11B
Bcl2a1	BCL2-related protein A1
Bcl6b	B-cell CLL/lymphoma 6, member B
Bean1	PREDICTED: brain expressed, associated with NEDD4, 1
Bex1	Brain expressed, X-linked 1
BF289184	EST453775 Rat Gene Index, normalized rat, cDNA cDNA clone RGIHC06sequence
BF557435	UI-R-C0-id-f-05-0-UI.r1 UI-R-C0 cDNA clone UI-R-C0-id-f-05-0-UI 5'sequence
BF563077	UI-R-BO1-aiy-d-07-0-UI.r1 UI-R-BO1 cDNA clone UI-R-BO1-aiy-d-07-0-UI 5'sequence
BG379292	UI-R-CS0-btu-a-04-0-UI.s1 UI-R-CS0 cDNA clone UI-R-CS0-btu-a-04-0-UI 3'sequence
BG666117	DRACPA04 Rat DRG Library cDNA clone DRACPA04 5'sequence
Bgn	Biglycan
BI283685	UI-R-CW0s-ccg-e-12-0-UI.s1 UI-R-CW0s cDNA clone UI-R-CW0s-ccg-e-12-0-UI 3'sequence
BI289684	UI-R-DK0-cfi-h-08-0-UI.s1 UI-R-DK0 cDNA clone UI-R-DK0-cfi-h-08-0-UI 3'sequence
BI295828	UI-R-DK0-cfb-b-05-0-UI.s1 UI-R-DK0 cDNA clone UI-R-DK0-cfb-b-05-0-UI 3'sequence
Blnk	B-cell linker
BM986371	EST531151 Rat gene index, normalized rat, norvegicus cDNA clone RGIAA19 5' endsequence
Bok	BCL2-related ovarian killer
Bola3	BolA family member 3
BP483256	BP483256 pancreatic islet cDNA clone RBC04697 5'sequence
BP485015	BP485015 pancreatic islet cDNA clone RBC18203 5'sequence
BQ078968	EST594375 Rat gene index, normalized rat, norvegicus cDNA clone RGOAA58 3' end similar to immunophilin p59sequence
BQ208420	UI-R-EP0-coc-j-12-0-UI.s1 UI-R-EP0 cDNA clone UI-R-EP0-coc-j-12-0-UI 3'sequence
BQ782432	UI-R-FF0-cpk-k-17-0-UI.s1 UI-R-FF0 cDNA clone UI-R-FF0-cpk-k-17-0-UI 3'sequence
Brd3	PREDICTED: bromodomain containing 3
Bri3	Brain protein I3
Btbd6	BTB domain containing 6
C1qtnf2	C1q and tumor necrosis factor related protein 2
C1qtnf5	C1q and tumor necrosis factor related protein 5
C2cd4a	PREDICTED: C2 calcium-dependent domain containing 4A
CA503908	UI-R-FS1-cqe-a-24-0-UI.s1 UI-R-FS1 cDNA clone UI-R-FS1-cqe-a-24-0-UI 3'sequence
CA505987	UI-R-FJ0-cqa-i-23-0-UI.s1 UI-R-FJ0 cDNA clone UI-R-FJ0-cqa-i-23-0-UI 3'sequence
Caap1	Caspase activity and apoptosis inhibitor 1
Calr3	Calreticulin 3
Calu	Calumenin
Cand2	Cullin-associated and neddylation-dissociated 2
Car11	Carbonic anhydrase 11
Car4	Carbonic anhydrase 4
Carns1	PREDICTED: carnosine synthase 1
Casp7	Caspase 7
Casq2	Calsequestrin 2
Cav1	Caveolin 1, caveolae protein
Cav3	Caveolin 3
CB315863	AGENCOURT_11525133 NICHD_Rr_Pit1 cDNA clone IMAGE:6888008 5'sequence
CB547694	AMGNNUC:CDRG1-00032-H11-A cdrg1
CB556309	AMGNNUC:NRHY5-00135-A11-A W Rat hypothalamus
CB605830	AMGNNUC:NRDG1-00077-B5-A nrdg1
CB606336	AMGNNUC:SRPG1-00001-E7-Z srpg1
Cbx6	PREDICTED: chromobox homolog 6
Ccdc141	PREDICTED: coiled-coil domain containing 141
Ccdc69	Coiled-coil domain containing 69
Ccdc74a	PREDICTED: coiled-coil domain containing 74A
Ccdc93	PREDICTED: coiled-coil domain containing 93
Cck	Cholecystokinin
Ccl1	C-C motif chemokine ligand 1
Ccl12	C-C motif chemokine ligand 12
Ccl2	C-C motif chemokine ligand 2
Ccl24	C-C motif chemokine ligand 24
Ccnd1	Cyclin D1
Ccnd2	Cyclin D2
Ccpg1	Cell cycle progression 1
Cd247	Cd247 molecule
Cd3g	CD3 molecule, gamma
Cd7	Cd7 molecule
Cd74	Cd74 molecule, major histocompatibility complex, class II invariant chain
Cd83	CD83 molecule
Cd93	CD93 molecule
Cdc34	Cell division cycle 34
Cdc42ep2	CDC42 effector protein
Cdc5l	Cell division cycle 5-like
Cdh13	Cadherin 13
Cdh20	Cadherin 20
Cdk6	PREDICTED: cyclin-dependent kinase 6
Cdkl3	PREDICTED: cyclin-dependent kinase-like 3
Cdr2l	PREDICTED: cerebellar degeneration-related protein 2-like
Cep68	PREDICTED: centrosomal protein 68
Cercam	Cerebral endothelial cell adhesion molecule
CF106908	SHultzomica00159 Rat lung airway and parenchyma cDNA libraries cDNA clone Contig2729 5'sequence
Chmp1a	Charged multivesicular body protein 1A
Chn2	TL0ABA27YH23 mRNA sequence.
Chrac1	Chromatin accessibility complex 1
Chrng	Cholinergic receptor, nicotinic, gamma
Chst15	PREDICTED: carbohydrate (N-acetylgalactosamine 4-sulfate 6-O) sulfotransferase 15
Chst7	Carbohydrate sulfotransferase 7
Ciita	Class II, major histocompatibility complex, transactivator
Cilp	Cartilage intermediate layer protein, nucleotide pyrophosphohydrolase
Cisd3	CDGSH iron sulfur domain 3
Cited1	Cbp/p300-interacting transactivator with Glu/Asp-rich carboxy-terminal domain 1
CK841926	UI-R-BJ0p-aip-e-10-0-UI.s10 UI-R-BJ0p cDNA clone UI-R-BJ0p-aip-e-10-0-UI 3'sequence
Ckb	Creatine kinase, brain
Clcn4	Chloride channel, voltage-sensitive 4
Clcnkb	Chloride channel, voltage-sensitive Kb
Clec10a	C-type lectin domain family 10, member A
Cluh	Clustered mitochondria
Cmpk2	Cytidine monophosphate kinase 2
Cmtm5	CKLF-like MARVEL transmembrane domain containing 5
Cntln	Centlein, centrosomal protein
Cntn1	PREDICTED: contactin 1
CO383893	AGENCOURT_26621095 NIH_MGC_253 cDNA clone IMAGE:7303289 5'sequence
CO385963	AGENCOURT_26621825 NIH_MGC_253 cDNA clone IMAGE:7302734 5'sequence
CO389165	AGENCOURT_26621642 NIH_MGC_253 cDNA clone IMAGE:7302579 5'sequence
CO398263	AGENCOURT_26756290 NIH_MGC_255 cDNA clone IMAGE:7319437 5'sequence
CO567020	AGENCOURT_28542706 NIH_MGC_248 cDNA clone IMAGE:7374382 5'sequence
Coa3	Cytochrome C oxidase assembly factor 3
Coa7	Cytochrome c oxidase assembly factor 7
Cog2	Component of oligomeric golgi complex 2
Col14a1	Collagen, type XIV, alpha 1
Col15a1	Collagen, type XV, alpha 1
Col1a1	Collagen, type I, alpha 1
Col1a2	Collagen, type I, alpha 2
Col27a1	PREDICTED: collagen, type XXVII, alpha 1
Col3a1	Collagen, type III, alpha 1
Col5a1	Collagen, type V, alpha 1
Col5a3	Collagen, type V, alpha 3
Col6a2	Collagen, type VI, alpha 2
Col6a3	PREDICTED: collagen, type VI, alpha 3
Col8a1	Collagen, type VIII, alpha 1
Colgalt2	PREDICTED: collagen beta (1-O)galactosyltransferase 2
Commd1	Copper metabolism domain containing 1
Coprs	RVL4502 Wackym-Soares normalized rat vestibular cDNA library cDNA 5'sequence
Coro1c	Coronin, actin binding protein 1C
Cox4i2	Cytochrome c oxidase subunit IV isoform 2
Cox7a2l	Cytochrome c oxidase subunit VIIa polypeptide 2 like
Cpa3	Carboxypeptidase A3
Cplx2	PREDICTED: complexin 2
Cpne9	Copine family member IX
Cpq	Carboxypeptidase Q
Cptp	Ceramide-1-phosphate transfer protein
Crb3	Crumbs family member 3
Creb5	PREDICTED: cAMP responsive element binding protein 5
Crip1	Cysteine-rich protein 1
Crip2	Cysteine-rich protein 2
Crmp1	Collapsin response mediator protein 1
Crtc1	PREDICTED: CREB regulated transcription coactivator 1
Crybb1	Crystallin, beta B1
Crym	Crystallin
Csrp1	Cysteine and glycine-rich protein 1
Ctgf	Connective tissue growth factor
Ctnna1	Catenin alpha 1
Ctxn1	Cortexin 1
Cux2	PREDICTED: cut-like homeobox 2
CV109460	AGENCOURT_31522624 NIH_MGC_269 cDNA clone IMAGE:7459544 5'sequence
CX569427	RVL403 Wackym-Soares normalized rat vestibular cDNA library cDNA 5'sequence
CX570487	RVL1649 Wackym-Soares normalized rat vestibular cDNA library cDNA 5'sequence
Cxcl10	Chemokine (C-X-C motif) ligand 10
Cxcl12	Chemokine (C-X-C motif) ligand 12
Cxcl9	Chemokine (C-X-C motif) ligand 9
Cyb5r3	Cytochrome b5 reductase 3
Cyp11a1	Cytochrome P450, family 11, subfamily a, polypeptide 1
Cyp2j3	Cytochrome P450, family 2, subfamily j, polypeptide 3
Cyp2j4	Cytochrome P450, family 2, subfamily j, polypeptide 4
Cyth3	Cytohesin 3
Dact1	PREDICTED: dishevelled-binding antagonist of beta-catenin 1
Dact3	Dapper, antagonist of beta-catenin, homolog 3
Dag1	Dystroglycan 1
Dbi	Diazepam binding inhibitor
Dbn1	Drebrin 1
Dbnl	Drebrin-like
Dcakd	Dephospho-CoA kinase domain containing
Dclk1	Doublecortin-like kinase 1
Ddah2	Dimethylarginine dimethylaminohydrolase 2
Ddc	Dopa decarboxylase
Ddit3	DNA-damage inducible transcript 3
Ddit4l2	DNA-damage-inducible transcript 4-like 2
Ddo	D-aspartate oxidase
Ddx5	PREDICTED: DEAD -box helicase 5 (Ddx5)
Ddx58	DEAD -box helicase 58
Dffa	DNA fragmentation factor, alpha polypeptide
Dfnb31	Deafness, autosomal recessive 31
Dhdds	Dehydrodolichyl diphosphate synthase
Dhrs7c	Dehydrogenase/reductase
Dhx35	DEAH -box helicase 35
Dlg2	PREDICTED: discs, large homolog 2
Dlst	PREDICTED: dihydrolipoamide S-succinyltransferase
Dnaja3	PREDICTED: DnaJ
Dnajc15	DnaJ heat shock protein family (Hsp40) member C15
Dnm1l	Dynamin 1-like
Dnmt3b	DNA methyltransferase 3 beta
Dock10	PREDICTED: dedicator of cytokinesis 10
Dok7	PREDICTED: docking protein 7
Dpep1	Dipeptidase 1
Dpp4	Dipeptidylpeptidase 4
Dpysl3	Dihydropyrimidinase-like 3
Dscc1	DNA replication and sister chromatid cohesion 1
Dusp22	Dual specificity phosphatase 22
Dusp3	Dual specificity phosphatase 3
Dusp8	Dual specificity phosphatase 8
DV715586	RVL5283 Wackym-Soares normalized rat vestibular cDNA library cDNA 5'sequence
DV718257	RVL8850 Wackym-Soares normalized rat vestibular cDNA library cDNA 5'sequence
DV720418	RVL11431 Wackym-Soares normalized rat vestibular cDNA library cDNA 5'sequence
DV720984	RVL12087 Wackym-Soares normalized rat vestibular cDNA library cDNA 5'sequence
DV723748	RVL15663 Wackym-Soares normalized rat vestibular cDNA library cDNA 5'sequence
DV727963	RVL20545 Wackym-Soares normalized rat vestibular cDNA library cDNA 5'sequence
DV729108	RVL21873 Wackym-Soares normalized rat vestibular cDNA library cDNA 5'sequence
Dync1li2	Dynein, cytoplasmic 1 light intermediate chain 2
Dynll2	Dynein light chain LC8-type 2
Dynlt3	Dynein light chain Tctex-type 3
Dyrk2	Dual-specificity tyrosine-
Dzip1l	DAZ interacting zinc finger protein 1-like
E2f1	E2F transcription factor 1
Ebf2	Early B-cell factor 2
Ece2	Endothelin-converting enzyme 2
Eef1a2	Eukaryotic translation elongation factor 1 alpha 2
Efcc1	PREDICTED: EF-hand and coiled-coil domain containing 1
Efhc1	EF-hand domain
Efhd1	EF-hand domain family, member D1
Efnb3	Ephrin B3
Egfl8	EGF-like-domain, multiple 8
Egflam	EGF-like, fibronectin type III and laminin G domains
Egfr	Epidermal growth factor receptor
Egln1	PREDICTED: egl-9 family hypoxia-inducible factor 1
Egln3	Egl-9 family hypoxia-inducible factor 3
Egr2	Early growth response 2
Ehd4	EH-domain containing 4
Eif4e3	Eukaryotic translation initiation factor 4E family member 3
Elfn2	PREDICTED: extracellular leucine-rich repeat and fibronectin type III domain containing 2
Elk3	ELK3, member of ETS oncogene family
Eln	Elastin
Emcn	Endomucin
Emid1	EMI domain containing 1
Emp1	Epithelial membrane protein 1
Emp2	Epithelial membrane protein 2
Eno3	Enolase 3, beta, muscle
Enpep	Glutamyl aminopeptidase
Enpp1	PREDICTED: ectonucleotide pyrophosphatase/phosphodiesterase 1
Enpp2	Ectonucleotide pyrophosphatase/phosphodiesterase 2
ENSRNOT00000000246	PREDICTED: lipase maturation factor 1
ENSRNOT00000000720	PREDICTED: similar to KIAA1919 protein
ENSRNOT00000000737	PREDICTED: laminin, alpha 4
ENSRNOT00000001182	Unknown
ENSRNOT00000001691	PREDICTED: ataxin 2
ENSRNOT00000001853	2'5' oligoadenylate synthetase-2 mRNA, complete cds.
ENSRNOT00000002403	PREDICTED: phosphate cytidylyltransferase 1, choline, alpha
ENSRNOT00000003022	Unknown
ENSRNOT00000004016	Unknown
ENSRNOT00000004373	PREDICTED: C1q and tumor necrosis factor related protein 1
ENSRNOT00000005015	PREDICTED: galactosylceramidase
ENSRNOT00000006407	PREDICTED: v-crk avian sarcoma virus CT10 oncogene homolog
ENSRNOT00000007335	GIRK1/KGA inwardly rectifying potassium channel mRNA, complete cds.
ENSRNOT00000007528	PREDICTED: family with sequence similarity 49, member B
ENSRNOT00000007711	TL0AAA76YM11 mRNA sequence.
ENSRNOT00000007843	TL0ADA16YA23 mRNA sequence.
ENSRNOT00000008321	PREDICTED: laminin, beta 1
ENSRNOT00000008361	PREDICTED: matrilin 2
ENSRNOT00000008645	PREDICTED: loss of heterozygosity, 12, chromosomal region 1
ENSRNOT00000009491	TL0AAA46YH20 mRNA sequence.
ENSRNOT00000009696	PREDICTED: fibulin 2
ENSRNOT00000010185	TL0ACA42YD22 mRNA sequence.
ENSRNOT00000010831	R.norvegicus cholesterol side-chain cleavage enzyme mRNA
ENSRNOT00000010939	PREDICTED: junctophilin 2
ENSRNOT00000011290	PREDICTED: collectin sub-family member 11
ENSRNOT00000011325	PREDICTED: coiled-coil domain containing 30
ENSRNOT00000011466	DACT1_MOUSE
ENSRNOT00000011666	PREDICTED: GATA zinc finger domain containing 1
ENSRNOT00000011963	PREDICTED: guanine nucleotide binding protein
ENSRNOT00000012048	PREDICTED: C2 calcium-dependent domain containing 4B
ENSRNOT00000012464	PREDICTED: late cornified envelope protein 1C-like
ENSRNOT00000012757	Similar to papilin, proteoglycan-like sulfated glycoprotein; papilin
ENSRNOT00000012765	PREDICTED: transmembrane protein 74B
ENSRNOT00000013044	PREDICTED: sterile alpha motif domain-containing protein 9-like
ENSRNOT00000013475	Unknown
ENSRNOT00000014814	PREDICTED: family with sequence similarity 161, member B
ENSRNOT00000014860	Arylsulfatase B
ENSRNOT00000014867	PREDICTED: testicular cell adhesion molecule 1
ENSRNOT00000014997	PREDICTED: C-x (9)-C motif containing 2
ENSRNOT00000015606	Unknown
ENSRNOT00000016100	PREDICTED: ring finger protein 128, E3 ubiquitin protein ligase
ENSRNOT00000017504	Unknown
ENSRNOT00000017998	Palmitoyl-protein thioesterase mRNA, complete cds.
ENSRNOT00000018225	PREDICTED: inverted formin, FH2 and WH2 domain containing
ENSRNOT00000018649	PREDICTED: desmoplakin
ENSRNOT00000019667	Unknown
ENSRNOT00000019755	PREDICTED: heparan-alpha-glucosaminide N-acetyltransferase
ENSRNOT00000020428	PREDICTED: dystrophia myotonica-protein kinase
ENSRNOT00000020673	PREDICTED: obscurin-like 1
ENSRNOT00000021188	TL0ACA74YC15 mRNA sequence.
ENSRNOT00000021397	PREDICTED: dipeptidase 1
ENSRNOT00000021603	Unknown
ENSRNOT00000023721	PREDICTED: similar to 1190005I06Rik protein
ENSRNOT00000024237	PREDICTED: nudix hydrolase 8
ENSRNOT00000024609	TL0ACA43YF08 mRNA sequence.
ENSRNOT00000024639	PREDICTED: zinc finger protein 768-like
ENSRNOT00000024786	PREDICTED: NACC family member 2, BEN and BTB
ENSRNOT00000024990	PREDICTED: mitochondrial ribosomal protein L30
ENSRNOT00000025092	AMGNNUC:NRHY5-00232-D11-A W Rat hypothalamus
ENSRNOT00000025536	Neurotrophic tyrosine kinase, receptor, type 3
ENSRNOT00000025795	PREDICTED: spectrin repeat containing, nuclear envelope 1
ENSRNOT00000025907	Unknown
ENSRNOT00000025981	PREDICTED: zinc finger protein 606
ENSRNOT00000026174	PREDICTED: SH3 domain and tetratricopeptide repeats 2
ENSRNOT00000026536	PREDICTED: hydroxyacylglutathione hydrolase-like
ENSRNOT00000026707	PREDICTED: collagen, type VI, alpha 3
ENSRNOT00000026719	O88493_MOUSE (O88493) Type VI collagen alpha 3 subunit, partial
ENSRNOT00000026767	EGLN1 mRNA, complete cds.
ENSRNOT00000027121	PREDICTED: WD repeat-containing protein 90-like
ENSRNOT00000027232	PREDICTED: kelch-like family member 30
ENSRNOT00000028097	PREDICTED: ribonuclease H2, subunit C
ENSRNOT00000028483	Unknown
ENSRNOT00000029125	PREDICTED: monoglyceride lipase
ENSRNOT00000029552	Optic atrophy 3
ENSRNOT00000029572	PREDICTED: single-pass membrane protein with coiled-coil domains 1
ENSRNOT00000029719	PREDICTED: nuclear factor of kappa light polypeptide gene enhancer in B-cells inhibitor, delta
ENSRNOT00000030109	Similar to chromosome 1 open reading frame 17
ENSRNOT00000030379	PREDICTED: leucine rich repeat containing 75A
ENSRNOT00000031962	PREDICTED: inverted formin, FH2 and WH2 domain containing
ENSRNOT00000032209	Similar to glyceraldehyde-3-phosphate dehydrogenase
ENSRNOT00000032529	PREDICTED: leucine-rich repeats and death domain containing 1
ENSRNOT00000033542	Similar to DC-SIGN
ENSRNOT00000034062	Unknown
ENSRNOT00000034097	PREDICTED: uncharacterized LOC100912785
ENSRNOT00000035255	Unknown
ENSRNOT00000036092	PREDICTED: zinc finger, DHHC-type containing 2
ENSRNOT00000036147	PREDICTED: h-2 class I histocompatibility antigen, K-W28 alpha chain-like
ENSRNOT00000036357	PREDICTED: MICAL-like 1
ENSRNOT00000037015	Similar to hypothetical protein FLJ39502
ENSRNOT00000037202	PREDICTED: family with sequence similarity 131, member C
ENSRNOT00000037313	PREDICTED: zinc finger protein 618
ENSRNOT00000037503	Unknown
ENSRNOT00000038152	PREDICTED: dystrophia myotonica-protein kinase
ENSRNOT00000038184	FM108948 etnohea cDNA clone etnoheaP0012A20 5'sequence
ENSRNOT00000038596	PREDICTED: DAZ interacting zinc finger protein 1
ENSRNOT00000039631	PREDICTED: AHNAK nucleoprotein 2
ENSRNOT00000041253	PREDICTED: up-regulator of carnitine transporter, OCTN2
ENSRNOT00000043006	Unknown
ENSRNOT00000043269	PREDICTED: disks large homolog 5-like
ENSRNOT00000043419	Unknown
ENSRNOT00000043647	Unknown
ENSRNOT00000043811	PREDICTED: WDFY family member 4
ENSRNOT00000044934	Unknown
ENSRNOT00000044969	PREDICTED: myomesin 3
ENSRNOT00000045263	PREDICTED: similar to NADH-ubiquinone oxidoreductase B9 subunit
ENSRNOT00000045948	PREDICTED: mast cell protease 1-like 4
ENSRNOT00000046026	TL0ACA91YK03 mRNA sequence.
ENSRNOT00000046552	PREDICTED: ring finger protein 207
ENSRNOT00000047010	Unknown
ENSRNOT00000047043	PREDICTED: protein S100-A11-like
ENSRNOT00000047105	PREDICTED: protein phosphatase 1, regulatory subunit 13 like
ENSRNOT00000047805	PREDICTED: aspartate-beta-hydroxylase
ENSRNOT00000047889	PREDICTED: coiled-coil-helix-coiled-coil-helix domain containing 7
ENSRNOT00000048584	Similar to ubiquinol-cytochrome c reductase binding protein
ENSRNOT00000048687	PREDICTED: sarcalumenin
ENSRNOT00000048985	Tenascin XB
ENSRNOT00000049672	PREDICTED: similar to Glutaminyl-peptide cyclotransferase precursor
ENSRNOT00000049810	PREDICTED: DENN/MADD domain containing 4B
ENSRNOT00000050072	PREDICTED: similar to CG7638-PA
ENSRNOT00000050090	PREDICTED: transmembrane protein 258 B
ENSRNOT00000050943	Unknown
ENSRNOT00000051185	Similar to alpha-tubulin
ENSRNOT00000051326	MMAJ2969 S-periaxin {Mus musculus}
ENSRNOT00000051382	PREDICTED: caspase recruitment domain family, member 11
ENSRNOT00000051411	TL0ACA5YJ08 mRNA sequence.
ENSRNOT00000052237	PREDICTED: uncharacterized LOC102554678
ENSRNOT00000055114	PREDICTED: testis expressed 2
ENSRNOT00000055321	PREDICTED: glycerophosphodiester phosphodiesterase domain containing 5
ENSRNOT00000055886	PREDICTED: nuclear receptor interacting protein 2
ENSRNOT00000055958	Unknown
ENSRNOT00000056845	R.norvegicus mRNA for Ig rearranged mu-chain C region, exons 2-4.
ENSRNOT00000058190	PREDICTED: NADH dehydrogenase
ENSRNOT00000058803	PREDICTED: LIM domain binding 2
ENSRNOT00000059589	T-cell receptor beta chain mRNA, complete cds.
ENSRNOT00000061204	PREDICTED: small integral membrane protein 4
ENSRNOT00000063903	Similar to 60 kDa heat shock protein, mitochondrial precursor
ENSRNOT00000063953	PREDICTED: translocase of outer mitochondrial membrane 5 homolog
ENSRNOT00000064184	TL0AAA79YH16 mRNA sequence.
ENSRNOT00000064478	PREDICTED: collagen, type IV, alpha 5
ENSRNOT00000064850	PREDICTED: palladin, cytoskeletal associated protein
ENSRNOT00000064892	Similar to T-cell receptor beta-2 chain C region
ENSRNOT00000064893	PREDICTED: Fas-activated serine/threonine kinase
ENSRNOT00000066150	Q69ZD9_MOUSE
ENSRNOT00000066348	PREDICTED: nicotinamide riboside kinase 2
ENSRNOT00000067056	PREDICTED: cordon-bleu WH2 repeat protein-like 1
ENSRNOT00000067109	PREDICTED: F-box protein 44
ENSRNOT00000067522	PREDICTED: translocase of outer mitochondrial membrane 5 homolog
ENSRNOT00000068065	PREDICTED: family with sequence similarity 43, member B
ENSRNOT00000068093	TL0ACA60YP16 mRNA sequence.
ENSRNOT00000068499	PREDICTED: similar to EF hand calcium binding domain 1
ENSRNOT00000068656	Unknown
ENSRNOT00000070899	Unknown
ENSRNOT00000070978	PREDICTED: perilipin 3
ENSRNOT00000071119	PREDICTED: spalt-like transcription factor 4
ENSRNOT00000071562	PREDICTED: killer cell lectin-like receptor 4
ENSRNOT00000071723	Unknown
ENSRNOT00000072081	PREDICTED: similar to butyrophilin 3
ENSRNOT00000072485	PREDICTED: SH3 domain containing ring finger 3
ENSRNOT00000073131	PREDICTED: IgA-inducing protein
ENSRNOT00000073221	PREDICTED: solute carrier family 39
ENSRNOT00000073370	Unknown
ENSRNOT00000073503	PREDICTED: IQ motif and Sec7 domain 1
ENSRNOT00000073547	PREDICTED: interferon-induced protein 44-like
ENSRNOT00000073768	Unknown
ENSRNOT00000073769	Unknown
ENSRNOT00000074150	PREDICTED: intersectin 2
ENSRNOT00000075236	PREDICTED: cytochrome c oxidase subunit 7A1, mitochondrial-like
ENSRNOT00000075646	PREDICTED: suppressor of defective silencing 3 homolog
ENSRNOT00000075968	AGENCOURT_17579088 NIH_MGC_232 cDNA clone IMAGE:7121677 5'sequence
ENSRNOT00000076106	PREDICTED: protein tyrosine phosphatase, non-receptor type 3
Entpd6	Ectonucleoside triphosphate diphosphohydrolase 6
Epb41l3	Erythrocyte membrane protein band 4.1-like 3
Epb41l4a	Erythrocyte membrane protein band 4.1 like 4A
Ephx1	Epoxide hydrolase 1, microsomal
Ermp1	Endoplasmic reticulum metallopeptidase 1
Esrra	Estrogen related receptor, alpha
EV778306	AGENCOURT_114815584 NIH_MGC_433 cDNA clone IMAGE:9101516 5'sequence
EV780505	AGENCOURT_114816428 NIH_MGC_433 cDNA clone IMAGE:9098281 5'sequence
Evc	Ellis van Creveld protein
Evl	Enah/Vasp-like
EX491204	AGENCOURT_118863839 NIH_MGC_252 cDNA clone IMAGE:9112356 5'sequence
Exoc3	Exocyst complex component 3
Ext1	Exostosin glycosyltransferase 1
Extl1	Exostosin-like glycosyltransferase 1
F2rl1	Coagulation factor II
F3	Coagulation factor III
Fa2h	Fatty acid 2-hydroxylase
Fads1	Fatty acid desaturase 1
Fads3	Fatty acid desaturase 3
Faim3	Fas apoptotic inhibitory molecule 3
Fam101b	Family with sequence similarity 101, member B
Fam104a	Family with sequence similarity 104, member A
Fam109a	PREDICTED: family with sequence similarity 109, member A
Fam110b	PREDICTED: family with sequence similarity 110, member B
Fam114a1	PREDICTED: family with sequence similarity 114, member A1
Fam120a	Family with sequence similarity 120A
Fam120b	Family with sequence similarity 120B
Fam124a	PREDICTED: family with sequence similarity 124A
Fam129b	Family with sequence similarity 129, member B
Fam161b	PREDICTED: family with sequence similarity 161, member B
Fam171b	PREDICTED: family with sequence similarity 171, member B
Fam178b	PREDICTED: family with sequence similarity 178, member B
Fam189b	Family with sequence similarity 189, member B
Fam195a	Family with sequence similarity 195, member A
Fam198b	Family with sequence similarity 198, member B
Fam19a3	PREDICTED: family with sequence similarity 19
Fam20c	Family with sequence similarity 20, member C
Fam26e	Family with sequence similarity 26, member E
Fam53b	Family with sequence similarity 53, member B
Fam69b	Family with sequence similarity 69, member B
Fam73b	Family with sequence similarity 73, member B
Fam78a	PREDICTED: family with sequence similarity 78, member A
Fam78b	PREDICTED: family with sequence similarity 78, member B
Fam81a	Family with sequence similarity 81, member A
Fblim1	PREDICTED: filamin binding LIM protein 1
Fbln1	Fibulin 1
Fbln5	Fibulin 5
Fbn1	Fibrillin 1
Fbn2	Fibrillin 2
Fbrsl1	PREDICTED: fibrosin-like 1
Fbxl14	F-box and leucine-rich repeat protein 14
Fbxo40	PREDICTED: F-box protein 40
Fbxo45	PREDICTED: F-box protein 45
Fbxw5	F-box and WD repeat domain containing 5
Fcer2	Fc fragment of IgE, low affinity II, receptor for
Fcna	Ficolin A
Fem1a	Fem-1 homolog a
Fez1	Fasciculation and elongation protein zeta 1
Fez2	Fasciculation and elongation protein zeta 2
Fgf16	Fibroblast growth factor 16
Fgf9	Fibroblast growth factor 9
Fhl2	Four and a half LIM domains 2
Fitm2	Fat storage-inducing transmembrane protein 2
Fkbp4	FK506 binding protein 4
Flvcr2	Feline leukemia virus subgroup C cellular receptor family, member 2
FM073733	FM073733 etnoaor cDNA clone etnoaorP0017N02 5'sequence
FM080674	FM080674 etnoaor cDNA clone etnoaorP0039A24 5'sequence
FM101831	FM101831 etnofat cDNA clone etnofatP0060O15 5'sequence
FM110744	FM110744 etnohea cDNA clone etnoheaP0017O22 5'sequence
FM111634	FM111634 etnohea cDNA clone etnoheaP0020I04 5'sequence
Fn3k	Fructosamine 3 kinase
Fndc1	Fibronectin type III domain containing 1
Fndc5	Fibronectin type III domain containing 5
Foxs1	Forkhead box S1
FQ123365	FQ123365 skeletal muscle Sprague-Dawley cDNA 5'sequence
FQ148043	FQ148043 11-12 days foetus Sprague-Dawley cDNA clone TL0ADA5YF18 3'sequence
FQ213842	TL0AAA45YF06 mRNA sequence.
FQ214134	TL0AAA43YK21 mRNA sequence.
FQ214383	TL0AAA41YP21 mRNA sequence.
FQ215090	TL0ACA49YP03 mRNA sequence.
FQ220643	TL0ADA42YC18 mRNA sequence.
FQ221790	TL0ADA31YM21 mRNA sequence.
FQ233083	TL0AEA63YE07 mRNA sequence.
Frem1	PREDICTED: Fras1 related extracellular matrix 1
Frmd6	FERM domain containing 6
Fsd1l	PREDICTED: fibronectin type III and SPRY domain containing 1-like
Fsd2	Fibronectin type III and SPRY domain containing 2
Ftsj2	FtsJ RNA methyltransferase homolog 2
Fuom	Fucose mutarotase
Fxn	Frataxin
Fxyd6	FXYD domain-containing ion transport regulator 6
Fyco1	FYVE and coiled-coil domain containing 1
Fzd8	Frizzled class receptor 8
G0s2	G0/G1switch 2
Gadd45b	Growth arrest and DNA-damage-inducible, beta
Galnt13	Polypeptide N-acetylgalactosaminyltransferase 13
Galnt16	Polypeptide N-acetylgalactosaminyltransferase 16
Galnt18	Polypeptide N-acetylgalactosaminyltransferase 18
Gap43	Growth associated protein 43
Gas6	Growth arrest specific 6
Gata5	GATA binding protein 5
Gcgr	Glucagon receptor
Gcsam	PREDICTED: germinal center-associated, signaling and motility
Gdpd5	PREDICTED: glycerophosphodiester phosphodiesterase domain containing 5
Gfra2	GDNF family receptor alpha 2
Gfra3	GDNF family receptor alpha 3
Ggh	Gamma-glutamyl hydrolase
Ghr	PREDICTED: growth hormone receptor
Gipc2	GIPC PDZ domain containing family, member 2
Glb1l2	PREDICTED: galactosidase, beta 1-like 2
Gli2	GLI family zinc finger 2
Glis1	PREDICTED: GLIS family zinc finger 1
Glod5	Glyoxalase domain containing 5
Gls2	Glutaminase 2
Glt8d1	Glycosyltransferase 8 domain containing 1
Glyctk	PREDICTED: glycerate kinase
Gmpr	Guanosine monophosphate reductase
Gna12	Guanine nucleotide binding protein
Gnb5	Guanine nucleotide binding protein
Gng11	Guanine nucleotide binding protein
Golim4	PREDICTED: golgi integral membrane protein 4
Gpc6	PREDICTED: similar to Glypican-6 precursor
Gpd2	Glycerol-3-phosphate dehydrogenase 2, mitochondrial
Gpi	Glucose-6-phosphate isomerase
Gpm6b	PREDICTED: glycoprotein m6b
Gpr132	G protein-coupled receptor 132
Gpr161	PREDICTED: G protein-coupled receptor 161
Gpr183	G protein-coupled receptor 183
Gpsm1	G-protein signaling modulator 1
Gpx7	Glutathione peroxidase 7
Gramd4	PREDICTED: GRAM domain containing 4
Grb14	Growth factor receptor bound protein 14
Grcc10	Gene rich cluster, C10 gene
Grifin	Galectin-related inter-fiber protein
Grip2	Glutamate receptor interacting protein 2
Grn	Granulin
Grsf1	G-rich RNA sequence binding factor 1
Gulp1	GULP, engulfment adaptor PTB domain containing 1
Gys1	Glycogen synthase 1, muscle
Gzmb	Granzyme B
Gzmc	Granzyme C
Gzmm	Granzyme M
Hacd1	3-hydroxyacyl-CoA dehydratase 1
Hccs	Holocytochrome c synthase
Hcfc1r1	Host cell factor C1 regulator 1
Hcn4	Hyperpolarization activated cyclic nucleotide-gated potassium channel 4
Hddc3	HD domain containing 3
Helz2	Helicase with zinc finger 2, transcriptional coactivator
Hes6	Hes family bHLH transcription factor 6
Hexb	Hexosaminidase B
Hhatl	Hedgehog acyltransferase-like
Hk2	PREDICTED: hexokinase 2
Hmga1	PREDICTED: high mobility group AT-hook 1
Hmgb3	High mobility group box 3
Hmgcs1	3-hydroxy-3-methylglutaryl-CoA synthase 1
Homer1	Homer scaffolding protein 1
Hopx	HOP homeobox
Hpdl	4-hydroxyphenylpyruvate dioxygenase-like
Hps1	Hermansky-Pudlak syndrome 1 homolog
Hras	Harvey rat sarcoma virus oncogene
Hrasls	HRAS-like suppressor
Hrc	Histidine rich calcium binding protein
Hsd17b1	Hydroxysteroid
Hsh2d	Hematopoietic SH2 domain containing
Hspa12a	Heat shock protein 12A
Hspb3	Heat shock protein B3
Hus1	HUS1 checkpoint homolog
Hykk	PREDICTED: hydroxylysine kinase
Icoslg	PREDICTED: inducible T-cell co-stimulator ligand
Id2	Inhibitor of DNA binding 2
Ifi47	Interferon gamma inducible protein 47
Igfbp6	Insulin-like growth factor binding protein 6
Igfbp7	Insulin-like growth factor binding protein 7
Igsf10	Immunoglobulin superfamily, member 10
Ikbip	PREDICTED: IKBKB interacting protein
Il15	Interleukin 15
Il17d	PREDICTED: interleukin 17D
Il2rb	Interleukin 2 receptor, beta
Il34	Interleukin 34
Ildr2	PREDICTED: immunoglobulin-like domain containing receptor 2
Ilk	Integrin-linked kinase
Impa2	PREDICTED: inositol (myo)-1 or 4)-monophosphatase 2
Impad1	Inositol monophosphatase domain containing 1
Inpp5j	Inositol polyphosphate-5-phosphatase J
Inppl1	Inositol polyphosphate phosphatase-like 1
Iqsec1	PREDICTED: IQ motif and Sec7 domain 1
Iqsec3	IQ motif and Sec7 domain 3
Iqub	IQ motif and ubiquitin domain containing
Irf4	Interferon regulatory factor 4
Irf7	Interferon regulatory factor 7
Irgm2	PREDICTED: immunity-related GTPase family M member 2
Isca1	Iron-sulfur cluster assembly 1
Isg15	ISG15 ubiquitin-like modifier
Islr	Immunoglobulin superfamily containing leucine-rich repeat
Itfg3	Integrin alpha FG-GAP repeat containing 3
Itga6	Integrin, alpha 6
Itgae	Integrin, alpha E
Itgb5	Integrin, beta 5
Itgbl1	Integrin, beta-like 1
Itih3	Inter-alpha trypsin inhibitor, heavy chain 3
Itm2a	Integral membrane protein 2A
Jarid2	PREDICTED: jumonji, AT rich interactive domain 2
Jmjd7	Jumonji domain containing 7
Josd2	Josephin domain containing 2
Jph2	Junctophilin 2
Jund	Jun D proto-oncogene
Jup	Junction plakoglobin
Kank2	KN motif and ankyrin repeat domains 2
Kank4	PREDICTED: KN motif and ankyrin repeat domains 4
Kazald1	Kazal-type serine peptidase inhibitor domain 1
Kazn	Kazrin, periplakin interacting protein
Kbtbd3	PREDICTED: kelch repeat and BTB
Kbtbd7	Kelch repeat and BTB
Kcna2	PREDICTED: potassium voltage-gated channel, shaker-related subfamily, member 2
Kcnb1	Potassium channel, voltage gated Shab-related subfamily B, member 1
Kcnd2	Potassium channel, voltage-gated Shal-related subfamily D, member 2
Kcnd3	Potassium channel, voltage-gated Shal-related subfamily D, member 3
Kcng2	Potassium channel, voltage gated modifier subfamily G, member 2
Kcnip2	Kv channel-interacting protein 2
Kcnj11	Potassium channel, inwardly rectifying subfamily J, member 11
Kcnj12	Potassium channel, inwardly rectifying subfamily J, member 12
Kcnj3	Potassium channel, inwardly rectifying subfamily J, member 3
Kcnj8	Potassium channel, inwardly rectifying subfamily J, member 8
Kcnk2	Potassium channel, two pore domain subfamily K, member 2
Kcnmb2	Potassium channel subfamily M regulatory beta subunit 2
Kcnn1	PREDICTED: potassium intermediate/small conductance calcium-activated channel, subfamily N, member 1
Kcnn3	Potassium channel, calcium activated intermediate/small conductance subfamily N alpha, member 3
Kcnv2	Potassium channel, voltage-gated modifier subfamily V, member 2
Kctd3	Potassium channel tetramerization domain containing 3
Kdm8	Lysine
Khdrbs3	KH domain containing, RNA binding, signal transduction associated 3
Kif26a	Kinesin family member 26A
Kifc3	Kinesin family member C3
Kitlg	KIT ligand
Klc3	Kinesin light chain 3
Klc4	Kinesin light chain 4
Klf10	Kruppel-like factor 10
Klf11	Kruppel-like factor 11
Klhdc8b	Kelch domain containing 8B
Klhl23	Kelch-like family member 23
Klhl31	Kelch-like family member 31
Klhl42	Kelch-like family, member 42
Klhl9	Kelch-like family member 9
Klk14	PREDICTED: kallikrein related-peptidase 14
Klk1c3	Kallikrein 1-related peptidase C3
Klrb1c	PREDICTED: killer cell lectin-like receptor subfamily B member 1C
Klrc3	PREDICTED: killer cell lectin-like receptor subfamily C, member 3
Klri1	Killer cell lectin-like receptor family I member 1
Kpna2	Karyopherin alpha 2
Krt10	Keratin 10, type I
Krt12	Keratin 12, type I
Krt24	Keratin 24, type I
L1cam	L1 cell adhesion molecule
Lamb3	Laminin, beta 3
Lamc3	Laminin gamma 3
Larp4b	La ribonucleoprotein domain family, member 4B
Lat2	Linker for activation of T cells family, member 2
Lbh	PREDICTED: limb bud and heart development
Lenep	Lens epithelial protein
Letm1	Leucine zipper-EF-hand containing transmembrane protein 1
Lgals5	Lectin, galactose binding, soluble 5
Lgals9	Lectin, galactoside-binding, soluble, 9
Lgi3	Leucine-rich repeat LGI family, member 3
Limd1	LIM domains containing 1
Lims2	LIM and senescent cell antigen like domains 2
Lipa	Lipase A, lysosomal acid, cholesterol esterase
Lix1l	Lix1-like
Lmln	PREDICTED: leishmanolysin-like
Lmo1	LIM domain only 1
Lmo7	LIM domain 7
LOC100125365	Hypothetical protein LOC100125365
LOC100302372	Hypothetical protein LOC100302372
LOC100360017	PREDICTED: mitochondrial ribosomal protein S6-like
LOC100360426	PREDICTED: translocase of outer mitochondrial membrane 5 homolog-like
LOC100361090	PREDICTED: high mobility group protein HMG-I/HMG-Y-like
LOC100361383	PREDICTED: extracellular matrix protein 2-like
LOC100362783	Uncharacterized protein C7orf61 homolog
LOC100362814	PREDICTED: hypothetical protein LOC100362814
LOC100362819	PREDICTED: autism susceptibility candidate 2-like
LOC100365212	PREDICTED: hypothetical protein LOC100365212
LOC100366216	PREDICTED: nuclear antigen Sp100-like
LOC100909849	PREDICTED: frizzled-8-like
LOC100910359	AGENCOURT_26730994 NIH_MGC_255 cDNA clone IMAGE:7316368 5'sequence
LOC100910558	Uncharacterized LOC100910558
LOC100910594	CDNA clone IMAGE:7105414.
LOC100910604	PREDICTED: uncharacterized LOC100910604
LOC100910676	PREDICTED: uncharacterized LOC100910676
LOC100910710	PREDICTED: NADH dehydrogenase
LOC100910772	PREDICTED: cytochrome c oxidase subunit 7A1, mitochondrial-like
LOC100910792	PREDICTED: amphiphysin-like
LOC100910809	PREDICTED: uncharacterized LOC100910809
LOC100910949	PREDICTED: uncharacterized LOC100910949
LOC100910978	PREDICTED: extracellular matrix protein 2-like
LOC100911384	PREDICTED: uncharacterized LOC100911384
LOC100911508	PREDICTED: uncharacterized LOC100911508
LOC100911572	PREDICTED: collagen alpha-3 (IV) chain-like
LOC100911946	PREDICTED: uncharacterized LOC100911946
LOC100912012	PREDICTED: tetranectin-like
LOC100912248	PREDICTED: uncharacterized LOC100912248
LOC100912658	PREDICTED: probable ATP-dependent RNA helicase DDX60-like
LOC100912724	PREDICTED: mast cell protease 8-like
LOC102546400	PREDICTED: uncharacterized LOC102546400
LOC102547411	PREDICTED: uncharacterized LOC102547411
LOC102547434	PREDICTED: uncharacterized LOC102547434
LOC102547591	PREDICTED: uncharacterized LOC102547591
LOC102547829	PREDICTED: uncharacterized LOC102547829
LOC102547897	PREDICTED: uncharacterized LOC102547897
LOC102547952	PREDICTED: uncharacterized LOC102547952
LOC102548203	PREDICTED: uncharacterized LOC102548203
LOC102548417	PREDICTED: uncharacterized LOC102548417
LOC102548546	PREDICTED: zinc finger protein 709-like
LOC102548611	PREDICTED: uncharacterized LOC102548611
LOC102548615	PREDICTED: uncharacterized LOC102548615
LOC102548729	PREDICTED: uncharacterized LOC102548729
LOC102549097	PREDICTED: uncharacterized LOC102549097
LOC102549198	PREDICTED: interferon-inducible GTPase 1-like
LOC102549572	PREDICTED: uncharacterized LOC102549572
LOC102549789	PREDICTED: uncharacterized LOC102549789
LOC102550095	PREDICTED: uncharacterized LOC102550095
LOC102550155	PREDICTED: uncharacterized LOC102550155
LOC102550196	PREDICTED: beta-1,3-galactosyl-O-glycosyl-glycoprotein beta-1,6-N-acetylglucosaminyltransferase 7-like
LOC102550363	PREDICTED: uncharacterized LOC102550363
LOC102550392	PREDICTED: uncharacterized LOC102550392
LOC102550976	PREDICTED: uncharacterized LOC102550976
LOC102551038	PREDICTED: uncharacterized LOC102551038
LOC102551073	PREDICTED: uncharacterized LOC102551073
LOC102551879	PREDICTED: uncharacterized LOC102551879
LOC102552120	PREDICTED: uncharacterized LOC102552120
LOC102552470	PREDICTED: uncharacterized LOC102552470
LOC102553023	PREDICTED: uncharacterized LOC102553023
LOC102553636	PREDICTED: uncharacterized LOC102553636
LOC102553763	PREDICTED: zinc finger protein 768-like
LOC102553770	PREDICTED: uncharacterized LOC102553770
LOC102553847	PREDICTED: uncharacterized LOC102553847
LOC102554092	PREDICTED: uncharacterized LOC102554092
LOC102554096	PREDICTED: guanylate-binding protein 6-like
LOC102554492	PREDICTED: uncharacterized LOC102554492
LOC102554639	PREDICTED: prolyl 3-hydroxylase 2-like
LOC102554789	PREDICTED: uncharacterized LOC102554789
LOC102555246	PREDICTED: uncharacterized LOC102555246
LOC102555433	PREDICTED: uncharacterized LOC102555433
LOC102555479	PREDICTED: uncharacterized LOC102555479
LOC102555634	PREDICTED: interferon-inducible GTPase 1-like
LOC102555635	PREDICTED: zinc finger protein 39-like
LOC102556031	PREDICTED: uncharacterized LOC102556031
LOC102556053	PREDICTED: uncharacterized LOC102556053
LOC102556513	PREDICTED: uncharacterized LOC102556513
LOC102556671	PREDICTED: uncharacterized LOC102556671
LOC102556795	PREDICTED: uncharacterized LOC102556795
LOC102557019	PREDICTED: uncharacterized LOC102557019
LOC102557027	PREDICTED: uncharacterized LOC102557027
LOC102557039	PREDICTED: uncharacterized LOC102557039
LOC102557368	PREDICTED: uncharacterized LOC102557368
LOC102557498	PREDICTED: collagen alpha-4
LOC103690031	PREDICTED: sterile alpha motif domain-containing protein 9-like
LOC103690934	PREDICTED: uncharacterized LOC103690934
LOC103691014	PREDICTED: uncharacterized LOC103691014
LOC103691274	PREDICTED: uncharacterized LOC103691274
LOC103691295	PREDICTED: uncharacterized LOC103691295
LOC103691394	PREDICTED: zinc finger protein 120-like
LOC103691558	PREDICTED: serine/threonine-protein kinase DCLK1-like
LOC103691752	PREDICTED: uncharacterized LOC103691752
LOC103691877	PREDICTED: uncharacterized LOC103691877
LOC103691886	PREDICTED: uncharacterized LOC103691886
LOC103691908	PREDICTED: uncharacterized LOC103691908
LOC103692079	PREDICTED: uncharacterized LOC103692079
LOC103692511	PREDICTED: uncharacterized LOC103692511
LOC103692639	PREDICTED: uncharacterized LOC103692639
LOC103692797	PREDICTED: uncharacterized LOC103692797
LOC103692917	PREDICTED: uncharacterized LOC103692917
LOC103693338	PREDICTED: uncharacterized LOC103693338
LOC103693478	PREDICTED: uncharacterized LOC103693478
LOC103693711	PREDICTED: uncharacterized LOC103693711
LOC103693875	PREDICTED: uncharacterized LOC103693875
LOC103693903	PREDICTED: uncharacterized LOC103693903
LOC103694153	PREDICTED: uncharacterized LOC103694153
LOC103694306	PREDICTED: uncharacterized LOC103694306
LOC103694423	PREDICTED: proto-oncogene tyrosine-protein kinase ROS-like
LOC103694957	PREDICTED: uncharacterized LOC103694957
LOC103695174	PREDICTED: uncharacterized LOC103695174
LOC103695196	PREDICTED: uncharacterized LOC103695196
LOC103695235	PREDICTED: uncharacterized LOC103695235
LOC103695279	PREDICTED: uncharacterized LOC103695279
LOC103695291	PREDICTED: arf-GAP with SH3 domain, ANK repeat and PH domain-containing protein 2-like
LOC292603	PREDICTED: similar to SH3-binding kinase
LOC301748	PREDICTED: similar to RIKEN cDNA 1700001E04
LOC313641	PREDICTED: perlecan
LOC317456	Hypothetical LOC317456
LOC360998	PREDICTED: hypothetical LOC360998
LOC361016	Similar to RIKEN cDNA 4933406L09
LOC363337	Similar to RIKEN cDNA 1700081O22
LOC498368	Similar to RIKEN cDNA 0610040J01
LOC501038	TL0ABA49YC15 mRNA sequence.
LOC502003	PREDICTED: similar to granzyme C
LOC502894	Hypothetical protein LOC502894
LOC680191	PREDICTED: similar to UPF0197 protein C11orf10 homolog
LOC680288	PREDICTED: similar to NADH-ubiquinone oxidoreductase B9 subunit
LOC682865	PREDICTED: similar to RAB family member
LOC683404	PREDICTED: similar to Retinitis pigmentosa 1-like 1 protein
LOC683897	Similar to Protein C6orf203
LOC684193	PREDICTED: similar to sterile alpha motif domain containing 9-like
LOC685655	PREDICTED: similar to CG7638-PA
LOC685668	PREDICTED: hypothetical protein LOC685668
LOC687508	PREDICTED: similar to Cytochrome c oxidase polypeptide VIIa-heart, mitochondrial precursor
LOC689065	Hypothetical protein LOC689065
LOC690138	PREDICTED: similar to UPF0197 protein C11orf10 homolog
LOC690182	PREDICTED: similar to Egl nine homolog 1
LOC691000	PREDICTED: hypothetical protein LOC691000
LOC691485	PREDICTED: hypothetical protein LOC691485
LOC691853	PREDICTED: similar to COX10 homolog, cytochrome c oxidase assembly protein, heme A: farnesyltransferase
LOC691995	Hypothetical protein LOC691995
Loxl1	Lysyl oxidase-like 1
Loxl2	Lysyl oxidase-like 2
Lpgat1	PREDICTED: lysophosphatidylglycerol acyltransferase 1
Lrp4	Low density lipoprotein receptor-related protein 4
Lrrc23	Leucine rich repeat containing 23
Lrrc28	Leucine rich repeat containing 28
Lrrc39	Leucine rich repeat containing 39
Lrrc3b	PREDICTED: leucine rich repeat containing 3B
Lrrc48	Leucine rich repeat containing 48
Lrrc4b	Leucine rich repeat containing 4B
Lrrc51	Leucine rich repeat containing 51
Lrrc8b	PREDICTED: leucine rich repeat containing 8 family, member B
Lsm5	LSM5 homolog, U6 small nuclear RNA associated
Ltbp4	Latent transforming growth factor beta binding protein 4
Ltc4s	Leukotriene C4 synthase
Ltn1	Listerin E3 ubiquitin protein ligase 1
Lum	Lumican
Ly49si2	Immunoreceptor Ly49si2
Lynx1	Ly6/neurotoxin 1
Lyrm7	LYR motif containing 7
Lyrm9	LYR motif containing 9
Lysmd1	LysM, putative peptidoglycan-binding, domain containing 1
Lysmd4	PREDICTED: LysM, putative peptidoglycan-binding, domain containing 4
Lzic	PREDICTED: leucine zipper and CTNNBIP1 domain containing
Lzts1	Leucine zipper, putative tumor suppressor 1
Macrod1	MACRO domain containing 1
Mafa	PREDICTED: v-maf avian musculoaponeurotic fibrosarcoma oncogene A
Maged2	Melanoma antigen, family D, 2
Magi3	Membrane associated guanylate kinase, WW and PDZ domain containing 3
Magohb	Mago-nashi homolog B
Man1c1	Mannosidase, alpha, class 1C, member 1
Manba	Mannosidase, beta A, lysosomal
Maob	Monoamine oxidase B
Map3k13	Mitogen-activated protein kinase kinase kinase 13
Map3k7cl	MAP3K7 C-terminal like
Map7d1	MAP7 domain containing 1
Mapk8ip1	Mitogen-activated protein kinase 8 interacting protein 1
Mapk9	PREDICTED: mitogen-activated protein kinase 9
Mapt	Microtubule-associated protein tau
Marcksl1	MARCKS-like 1
Mb21d1	PREDICTED: Mab-21 domain containing 1
Mbp	Myelin basic protein
Mcam	Melanoma cell adhesion molecule
Mcm5	PREDICTED: minichromosome maintenance complex component 5
Mcpt10	Mast cell protease 10
Mcpt1l1	Mast cell protease 1-like 1
Mcpt8	Mast cell protease 8
Mcpt9	Mast cell protease 9
Mea1	Male-enhanced antigen 1
Mef2a	PREDICTED: myocyte enhancer factor 2a
Metap1d	PREDICTED: methionyl aminopeptidase type 1D
Metrn	Meteorin, glial cell differentiation regulator
Metrnl	Meteorin, glial cell differentiation regulator-like
Mettl17	PREDICTED: methyltransferase like 17
Mex3b	Mex-3 RNA binding family member B
Mfap2	Microfibrillar-associated protein 2
Mfap4	Microfibrillar-associated protein 4
Mfap5	Microfibrillar associated protein 5
Mfhas1	PREDICTED: malignant fibrous histiocytoma amplified sequence 1
Mfn1	PREDICTED: mitofusin 1
Mgat3	PREDICTED: mannosyl
MGC108823	Similar to interferon-inducible GTPase
MGC109340	Similar to Microsomal signal peptidase 23 kDa subunit
Mgll	Monoglyceride lipase
Mgmt	O-6-methylguanine-DNA methyltransferase
Mical2	PREDICTED: microtubule associated monooxygenase, calponin and LIM domain containing 2
Micall1	PREDICTED: MICAL-like 1
Minos1	Mitochondrial inner membrane organizing system 1
Mkks	McKusick-Kaufman syndrome
Mllt11	Myeloid/lymphoid or mixed-lineage leukemia
Mlycd	Malonyl-CoA decarboxylase
Mmp11	Matrix metallopeptidase 11
Morc3	MORC family CW-type zinc finger 3
Mpc1	Mitochondrial pyruvate carrier 1
Mpdz	Multiple PDZ domain protein
Mpv17l	MPV17 mitochondrial membrane protein-like
Mras	Muscle RAS oncogene homolog
Mreg	PREDICTED: melanoregulin
Mrgprf	MAS-related GPR, member F
Mrpl12	Mitochondrial ribosomal protein L12
Mrpl13	Mitochondrial ribosomal protein L13
Mrpl19	Mitochondrial ribosomal protein L19
Mrpl20	Mitochondrial ribosomal protein L20
Mrpl22	Mitochondrial ribosomal protein L22
Mrpl24	Mitochondrial ribosomal protein L24
Mrpl27	Mitochondrial ribosomal protein L27
Mrpl34	Mitochondrial ribosomal protein L34
Mrpl37	Mitochondrial ribosomal protein L37
Mrpl38	Mitochondrial ribosomal protein L38
Mrpl40	Mitochondrial ribosomal protein L40
Mrpl45	Mitochondrial ribosomal protein L45
Mrps16	Mitochondrial ribosomal protein S16
Mrps34	Mitochondrial ribosomal protein S34
Mrps36	Mitochondrial ribosomal protein S36
Msl3	Male-specific lethal 3 homolog
Mst1	Macrophage stimulating 1
Mtap	PREDICTED: methylthioadenosine phosphorylase
Mtfp1	Mitochondrial fission process 1
Mthfsd	PREDICTED: methenyltetrahydrofolate synthetase domain containing
Mtif2	Mitochondrial translational initiation factor 2
Mtx1	Metaxin 1
Muc19	PREDICTED: mucin 19
Mvd	Mevalonate
Mxra8	Matrix-remodelling associated 8
Myadm	Myeloid-associated differentiation marker
Myh10	Myosin, heavy chain 10, non-muscle
Myh7b	Myosin, heavy chain 7B, cardiac muscle, beta
Myh8	Myosin, heavy chain 8, skeletal muscle, perinatal
Myo19	PREDICTED: myosin XIX
Myocd	Myocardin
Myoz1	Myozenin 1
Naa40	N(alpha)-acetyltransferase 40, NatD catalytic subunit
Naa60	N(alpha)-acetyltransferase 60, NatD catalytic subunit
Naalad2	PREDICTED: N-acetylated alpha-linked acidic dipeptidase 2
Naaladl2	PREDICTED: N-acetylated alpha-linked acidic dipeptidase-like 2
Nacad	NAC alpha domain containing
Nacc2	NACC family member 2, BEN and BTB
Narfl	Nuclear prelamin A recognition factor-like
Nav3	Neuron navigator 3
Nbl1	Neuroblastoma 1, DAN family BMP antagonist
Ncald	Neurocalcin delta
Ncapg2	PREDICTED: non-SMC condensin II complex, subunit G2
Nceh1	Neutral cholesterol ester hydrolase 1
Ncf1	Neutrophil cytosolic factor 1
Nck2	NCK adaptor protein 2
Nde1	NudE neurodevelopment protein 1
Ndn	Necdin, melanoma antigen
Ndrg3	NDRG family member 3
Ndufa4l2	NADH dehydrogenase
Ndufa8	PREDICTED: NADH dehydrogenase
Ndufaf5	NADH dehydrogenase
Ndufb10	NADH dehydrogenase
Ndufb7	NADH dehydrogenase
Ndufb8	NADH dehydrogenase
Ndufc2	NADH dehydrogenase
Nes	Nestin
Neurl3	Neuralized E3 ubiquitin protein ligase 3
Nexn	Nexilin
Nfatc2	BP483835 pancreatic islet cDNA clone RBC09148 5'sequence
Nfib	PREDICTED: nuclear factor I/B
Nfic	Nuclear factor I/C
Nfix	Nuclear factor I/X
Nfkbid	PREDICTED: nuclear factor of kappa light polypeptide gene enhancer in B-cells inhibitor, delta
Nfyc	Nuclear transcription factor-Y gamma
Nid1	PREDICTED: nidogen 1
Nid2	Nidogen 2
Ninj2	Ninjurin 2
Nkain1	PREDICTED: Na+/K+ transporting ATPase interacting 1
Nkd2	Naked cuticle homolog 2
Nkg7	Natural killer cell granule protein 7
Nlrp3	NLR family, pyrin domain containing 3
Nmnat1	Nicotinamide nucleotide adenylyltransferase 1
Nmnat3	Nicotinamide nucleotide adenylyltransferase 3
Nmrk2	PREDICTED: nicotinamide riboside kinase 2
Nol11	PREDICTED: nucleolar protein 11
Nov	Nephroblastoma overexpressed
Nphp1	Nephronophthisis 1
Nprl3	Nitrogen permease regulator-like 3
Npw	Neuropeptide W
Nr0b2	Nuclear receptor subfamily 0, group B, member 2
Nr2c1	PREDICTED: nuclear receptor subfamily 2, group C, member 1
Nr2f1	Nuclear receptor subfamily 2, group F, member 1
Nr2f6	Nuclear receptor subfamily 2, group F, member 6
Nr3c1	Nuclear receptor subfamily 3, group C, member 1
Nr4a2	Nuclear receptor subfamily 4, group A, member 2
Nrarp	Notch-regulated ankyrin repeat protein
Nrep	PREDICTED: neuronal regeneration related protein
Nrip2	PREDICTED: nuclear receptor interacting protein 2
Nrk	PREDICTED: Nik related kinase
Nrp1	Neuropilin 1
Nrp2	PREDICTED: neuropilin 2
Nt5m	PREDICTED: 5',3'-nucleotidase, mitochondrial
Nthl1	Nth
Ntrk3	Neurotrophic tyrosine kinase, receptor, type 3
Ntsr2	Neurotensin receptor 2
Nudt12	Nudix
Nudt8	PREDICTED: nudix (nucleoside diphosphate linked moiety X)-type motif 8
Nutf2	Nuclear transport factor 2
Nxnl2	Nucleoredoxin-like 2
Oaf	OAF homolog
Oas1i	2 ' -5 ' oligoadenylate synthetase 1I
Oasl	2'-5'-oligoadenylate synthetase-like
Ogdh	PREDICTED: oxoglutarate (alpha-ketoglutarate) dehydrogenase
Olfml3	Olfactomedin-like 3
Olr386	Olfactory receptor 386
Omd	Osteomodulin
Opa1	PREDICTED: optic atrophy 1
Opcml	PREDICTED: opioid binding protein/cell adhesion molecule-like
Osbpl6	PREDICTED: oxysterol binding protein-like 6
Osbpl8	PREDICTED: oxysterol binding protein-like 8
Pacsin2	Protein kinase C and casein kinase substrate in neurons 2
Pam16	Presequence translocase-associated motor 16 homolog
Pank4	Pantothenate kinase 4
Papln	PREDICTED: papilin, proteoglycan-like sulfated glycoprotein
Paqr4	Progestin and adipoQ receptor family member IV
Paqr6	Progestin and adipoQ receptor family member VI
Parp1	Poly
Parvb	Parvin, beta
Pcdh12	Protocadherin 12
Pcdh18	Protocadherin 18
Pcdh19	Protocadherin 19
Pcdh7	PREDICTED: protocadherin 7
Pcolce	Procollagen C-endopeptidase enhancer
Pcolce2	Procollagen C-endopeptidase enhancer 2
Pcp4l1	Purkinje cell protein 4-like 1
Pdcd1lg2	Programmed cell death 1 ligand 2
Pde1a	Phosphodiesterase 1A, calmodulin-dependent
Pde4a	Phosphodiesterase 4A, cAMP-specific
Pde8b	PREDICTED: phosphodiesterase 8B
Pdgfa	Platelet-derived growth factor alpha polypeptide
Pdgfrl	Platelet-derived growth factor receptor-like
Pdlim4	PDZ and LIM domain 4
Pds5b	PDS5 cohesin associated factor B
Pea15	Phosphoprotein enriched in astrocytes 15
Penk	Proenkephalin
Pepd	Peptidase D
Perm1	PPARGC1 and ESRR induced regulator, muscle 1
Pex19	Peroxisomal biogenesis factor 19
Pfkm	Phosphofructokinase, muscle
Pgam2	Phosphoglycerate mutase 2
Phf11	PHD finger protein 11
Phf11b	PHD finger protein 11B
Phldb1	Pleckstrin homology-like domain, family B, member 1
Phldb2	PREDICTED: pleckstrin homology-like domain, family B, member 2
Phlpp2	PH domain and leucine rich repeat protein phosphatase 2
Pithd1	PREDICTED: PITH
Pitpnb	Phosphatidylinositol transfer protein, beta
Pitpnm2	Phosphatidylinositol transfer protein, membrane-associated 2
Pitpnm3	PREDICTED: PITPNM family member 3
Pkia	Protein kinase
Pkig	Protein kinase
Plac9	Placenta-specific 9
Plau	Plasminogen activator, urokinase
Plcb1	PREDICTED: phospholipase C, beta 1
Plekha4	Pleckstrin homology domain containing, family A
Plekha6	PREDICTED: pleckstrin homology domain containing, family A member 6
Plekhb1	Pleckstrin homology domain containing, family B
Plekhh1	Pleckstrin homology domain containing, family H
Plekhh3	Pleckstrin homology domain containing, family H
Pllp	Plasmolipin
Plp1	Proteolipid protein 1
Plxdc1	Plexin domain containing 1
Plxnd1	Plexin D1
Pmm2	Phosphomannomutase 2
Pnkd	Paroxysmal nonkinesigenic dyskinesia
Pofut2	Protein O-fucosyltransferase 2
Polrmt	Polymerase
Pon3	Paraoxonase 3
Popdc2	PREDICTED: popeye domain containing 2
Ppapdc3	Phosphatidic acid phosphatase type 2 domain containing 3
Ppara	PREDICTED: peroxisome proliferator activated receptor alpha
Ppargc1b	Peroxisome proliferator-activated receptor gamma, coactivator 1 beta
Ppm1l	Protein phosphatase, Mg2+/Mn2+ dependent, 1L
Ppp1r14a	Protein phosphatase 1, regulatory
Ppp1r14c	Protein phosphatase 1, regulatory
Ppp1r3a	Protein phosphatase 1, regulatory subunit 3A
Ppp1r3c	Protein phosphatase 1, regulatory subunit 3C
Ppp2r3a	Protein phosphatase 2, regulatory subunit B'', alpha
Ppt1	Palmitoyl-protein thioesterase 1
Pptc7	PTC7 protein phosphatase homolog
Pqlc3	PQ loop repeat containing 3
Prdm6	PREDICTED: PR domain containing 6
Prelp	Proline/arginine-rich end leucine-rich repeat protein
Prickle3	Prickle homolog 3
Prkaa2	PREDICTED: protein kinase, AMP-activated, alpha 2 catalytic subunit
Prkab1	Protein kinase, AMP-activated, beta 1 non-catalytic subunit
Prkaca	Protein kinase, cAMP-dependent, catalytic, alpha
Prkag2	Protein kinase, AMP-activated, gamma 2 non-catalytic subunit
Prkca	PREDICTED: protein kinase C, alpha
Prkcdbp	Protein kinase C, delta binding protein
Prkce	Protein kinase C, epsilon
Prph	Peripherin
Prps2	Phosphoribosyl pyrophosphate synthetase 2
Prrx2	Paired related homeobox 2
Prss23	Protease, serine, 23
Psd3	PREDICTED: pleckstrin and Sec7 domain containing 3
Psmb8	Proteasome subunit beta 8
Pstk	Phosphoseryl-tRNA kinase
Ptcd3	Pentatricopeptide repeat domain 3
Ptges3l	PREDICTED: prostaglandin E synthase 3
Ptgfrn	Prostaglandin F2 receptor inhibitor
Ptgr2	Prostaglandin reductase 2
Ptp4a3	Protein tyrosine phosphatase type IVA, member 3
Ptpn21	Protein tyrosine phosphatase, non-receptor type 21
Ptpn4	Protein tyrosine phosphatase, non-receptor type 4
Ptprcap	Protein tyrosine phosphatase, receptor type, C-associated protein
Ptpro	Protein tyrosine phosphatase, receptor type, O
Qk	Quaking
Qki	PREDICTED: protein quaking-like
Qrsl1	Glutaminyl-tRNA synthase (glutamine-hydrolyzing)-like 1
Rab11fip4	PREDICTED: RAB11 family interacting protein 4
Rab12	RAB12, member RAS oncogene family
Rab22a	RAB22A, member RAS oncogene family
Rab27b	PREDICTED: RAB27B, member RAS oncogene family
Rab32	RAB32, member RAS oncogene family
Rab3a	RAB3A, member RAS oncogene family
Rab3il1	RAB3A interacting protein
Rab6b	RAB6B, member RAS oncogene family
Rab7b	Rab7b, member RAS oncogene family
Ramp1	Receptor (G protein-coupled) activity modifying protein 1
Ranbp3l	PREDICTED: RAN binding protein 3-like
Ranbp6	RAN binding protein 6
Rap1gap2	RAP1 GTPase activating protein 2
Rapgef2	Rap guanine nucleotide exchange factor
Rarres1	Retinoic acid receptor responder
Rasd2	RASD family, member 2
Rasgrp3	RAS guanyl releasing protein 3
Rassf3	Ras association (RalGDS/AF-6) domain family member 3
Rbck1	RanBP-type and C3HC4-type zinc finger containing 1
Rbfox1	RNA binding protein, fox-1 homolog
Rbm20	RNA binding motif protein 20
Rbm38	RNA binding motif protein 38
Rbp7	FM109053 etnohea cDNA clone etnoheaP0012F08 5'sequence
Rbpms	PREDICTED: RNA binding protein with multiple splicing
Rbpms2	RNA binding protein with multiple splicing 2
Rcor2	REST corepressor 2
Rdh13	Retinol dehydrogenase 13 (all-trans/9-cis)
Reck	Reversion-inducing-cysteine-rich protein with kazal motifs
Reep1	Receptor accessory protein 1
Rev3l	REV3-like, polymerase
Rftn2	PREDICTED: raftlin family member 2
RGD1302996	Hypothetical protein MGC:15854
RGD1306058	Similar to RIKEN cDNA 1110007C09
RGD1306750	LOC362451
RGD1307461	Similar to RIKEN cDNA 6430571L13 gene; similar to g20 protein
RGD1309036	Hypothetical LOC292874
RGD1309651	PREDICTED: similar to 1190005I06Rik protein
RGD1310127	Similar to cDNA sequence BC017158
RGD1310262	Hypothetical LOC304650
RGD1311084	Similar to 1700113K14Rik protein
RGD1559731	PREDICTED: similar to RIKEN cDNA 4930578C19
RGD1560065	Similar to RIKEN cDNA 2410004B18
RGD1561145	Similar to novel protein
RGD1562650	PREDICTED: similar to interferon alpha 8/6 precursor; IFNa8/6
RGD1563072	Similar to hypothetical protein FLJ38984
RGD1563091	PREDICTED: similar to OEF2
RGD1564899	PREDICTED: similar to chromosome 10 open reading frame 71
RGD1565410	Similar to Ly6-C antigen gene
RGD1565616	PREDICTED: RGD1565616
RGD1565784	RGD1565784
RGD1566085	PREDICTED: similar to pyridoxal (pyridoxine, vitamin B6) kinase
Rgl1	PREDICTED: ral guanine nucleotide dissociation stimulator,-like 1
Rgl3	Ral guanine nucleotide dissociation stimulator-like 3
Rgma	Repulsive guidance molecule family member A
Rgs10	Regulator of G-protein signaling 10
Rgs4	Regulator of G-protein signaling 4
Rgs5	Regulator of G-protein signaling 5
Rin3	Ras and Rab interactor 3
Rnaseh2a	Ribonuclease H2, subunit A
Rnaseh2c	PREDICTED: ribonuclease H2, subunit C
Rnf115	Ring finger protein 115
Rnf144a	PREDICTED: ring finger protein 144A
Rnf152	Ring finger protein 152
Rnf24	AMGNNUC:NRHY5-00156-E3-A W Rat hypothalamus
Robo1	PREDICTED: roundabout, axon guidance receptor, homolog 1
Ros1	ROS proto-oncogene 1 , receptor tyrosine kinase
Rp1	PREDICTED: retinitis pigmentosa 1
Rpl3l	Ribosomal protein L3-like
Rragd	Ras-related GTP binding D
Rras2	Related RAS viral (r-ras) oncogene homolog 2
RT1-Bb	RT1 class II, locus Bb
RT1-Da	RT1 class II, locus Da
RT1-Db1	RT1 class II, locus Db1
RT1-O1	RT1 class Ib, locus O1
Rtkn	Rhotekin
Rtn2	Reticulon 2
Rtn4ip1	PREDICTED: reticulon 4 interacting protein 1
Rtp4	Receptor
Runx1t1	Runt-related transcription factor 1; translocated to, 1
Rxra	Retinoid X receptor alpha
Rxrb	Retinoid X receptor beta
Rxrg	Retinoid X receptor gamma
S100a10	S100 calcium binding protein A10
S100a11	S100 calcium binding protein A11
S100a4	S100 calcium-binding protein A4
S100a5	S100 calcium binding protein A5
S100a6	S100 calcium binding protein A6
S100b	S100 calcium binding protein B
Sapcd1	Suppressor APC domain containing 1
Sapcd2	Suppressor APC domain containing 2
Sbk1	SH3 domain binding kinase 1
Scn2b	PREDICTED: sodium channel, voltage-gated, type II, beta subunit
Scpep1	Serine carboxypeptidase 1
Scrn1	PREDICTED: secernin 1
Scx	Scleraxis basic helix-loop-helix transcription factor
Sdhaf3	FM113376 etnohea cDNA clone etnoheaP0025C07 5'sequence
Sdhc	Succinate dehydrogenase complex, subunit C, integral membrane protein
Sdhd	Succinate dehydrogenase complex, subunit D, integral membrane protein
Sec14l5	SEC14-like 5
Sema3b	Sema domain, immunoglobulin domain
Sema3c	Sema domain, immunoglobulin domain
Sema4a	Sema domain, immunoglobulin domain
Sepn1	PREDICTED: selenoprotein N, 1
Sept4	Septin 4
Sept8	PREDICTED: septin 8
Sertad4	SERTA domain containing 4
Setd8	PREDICTED: SET domain containing
Sez6l2	Seizure related 6 homolog
Sgce	Sarcoglycan, epsilon
Sh2d2a	SH2 domain containing 2A
Sh2d4a	SH2 domain containing 4A
Sh3bp4	SH3-domain binding protein 4
Sh3bp5	SH3-domain binding protein 5
Sh3glb1	PREDICTED: SH3-domain GRB2-like endophilin B1
Sh3rf3	PREDICTED: SH3 domain containing ring finger 3
Sigirr	Single immunoglobulin and toll-interleukin 1 receptor
Sipa1l3	Signal-induced proliferation-associated 1 like 3
Sirt5	Sirtuin 5
Ska2	Spindle and kinetochore associated complex subunit 2
Skida1	PREDICTED: SKI/DACH domain containing 1
Slain2	SLAIN motif family, member 2
Slc12a5	Solute carrier family 12, member 5
Slc12a7	Solute carrier family 12 , member 7
Slc12a8	Solute carrier family 12, member 8
Slc13a2	Solute carrier family 13, member 2
Slc15a2	Solute carrier family 15, member 2
Slc16a10	PREDICTED: solute carrier family 16
Slc16a3	Solute carrier family 16
Slc16a7	Solute carrier family 16
Slc22a4	Solute carrier family 22
Slc24a4	Solute carrier family 24
Slc25a13	PREDICTED: solute carrier family 25
Slc25a15	PREDICTED: solute carrier family 25
Slc25a19	Solute carrier family 25
Slc25a26	Solute carrier family 25
Slc25a34	Solute carrier family 25
Slc25a36	PREDICTED: solute carrier family 25
Slc25a42	Solute carrier family 25, member 42
Slc25a46	Solute carrier family 25, member 46
Slc26a6	Solute carrier family 26
Slc29a1	Solute carrier family 29
Slc2a4	Solute carrier family 2
Slc2a9	Solute carrier family 2
Slc35a4	Solute carrier family 35, member A4
Slc37a1	Solute carrier family 37
Slc37a4	Solute carrier family 37
Slc38a3	Solute carrier family 38, member 3
Slc38a5	Solute carrier family 38, member 5
Slc39a13	Solute carrier family 39
Slc4a1	Solute carrier family 4
Slc4a3	PREDICTED: solute carrier family 4
Slc4a4	PREDICTED: solute carrier family 4, sodium bicarbonate cotransporter, member 4
Slco2b1	Solute carrier organic anion transporter family, member 2b1
Slco5a1	PREDICTED: solute carrier organic anion transporter family, member 5A1
Slfn5	PREDICTED: schlafen family member 5
Slitrk6	SLIT and NTRK-like family, member 6
Smap2	Small ArfGAP2
Smarcd3	SWI/SNF related, matrix associated, actin dependent regulator of chromatin, subfamily d, member 3
Smco4	Single-pass membrane protein with coiled-coil domains 4
Smim20	Small integral membrane protein 20
Smim5	Small integral membrane protein 5
Smim8	Small integral membrane protein 8
Smpx	Small muscle protein, X-linked
Smtn	Smoothelin
Smyd1	SET and MYND domain containing 1
Sncg	Synuclein, gamma
Snn	Stannin
Snrnp27	Small nuclear ribonucleoprotein 27
Snta1	Syntrophin, alpha 1
Sod3	Superoxide dismutase 3, extracellular
Sox6	PREDICTED: SRY
Sparc	Secreted protein, acidic, cysteine-rich
Sparcl1	SPARC-like 1
Spata13	PREDICTED: spermatogenesis associated 13
Spats2l	Spermatogenesis associated, serine-rich 2-like
Specc1	PREDICTED: sperm antigen with calponin homology and coiled-coil domains 1
Spef1	Sperm flagellar 1
Speg	SPEG complex locus
Sphk2	Sphingosine kinase 2
Spon2	Spondin 2, extracellular matrix protein
Sprn	PREDICTED: shadow of prion protein homolog
Spsb3	SplA/ryanodine receptor domain and SOCS box containing 3
Sptbn1	PREDICTED: spectrin, beta, non-erythrocytic 1
Srf	Serum response factor
Sri	PREDICTED: sorcin
Srrm4	PREDICTED: serine/arginine repetitive matrix 4
Srsf3	Serine/arginine-rich splicing factor 3
Sspo	SCO-spondin
St3gal5	ST3 beta-galactoside alpha-2,3-sialyltransferase 5
St3gal6	ST3 beta-galactoside alpha-2,3-sialyltransferase 6
St5	Suppression of tumorigenicity 5
St6galnac3	ST6 N-acetylgalactosaminide alpha-2,6-sialyltransferase 3
Stard8	StAR-related lipid transfer
Stat5a	Signal transducer and activator of transcription 5A
Stc1	Stanniocalcin 1
Stk36	Serine/threonine kinase 36
Stmn4	Stathmin-like 4
Stoml1	Stomatin
Strbp	PREDICTED: spermatid perinuclear RNA binding protein
Stxbp4	PREDICTED: syntaxin binding protein 4
Sulf2	Sulfatase 2
Sult5a1	Sulfotransferase family 5A, member 1
Susd2	Sushi domain containing 2
Synj2	Synaptojanin 2
Synj2bp	Synaptojanin 2 binding protein
Synpo2l	Synaptopodin 2-like
Sypl2	Synaptophysin-like 2
Syt11	PREDICTED: synaptotagmin XI
Syt14	PREDICTED: synaptotagmin XIV
Syt5	Synaptotagmin V
Sytl4	PREDICTED: synaptotagmin-like 4
Taco1	Translational activator of mitochondrially encoded cytochrome c oxidase I
Taf12	PREDICTED: TAF12 RNA polymerase II, TATA box binding protein
Tas2r120	Taste receptor, type 2, member 120
Tbc1d1	PREDICTED: TBC1
Tbc1d9	TBC1 domain family, member 9
Tceal7	Transcription elongation factor A
Tcf19	Transcription factor 19
Tdh	L-threonine dehydrogenase
Tdrd1	Tudor domain containing 1
Tenm4	Teneurin transmembrane protein 4
Tfec	PREDICTED: transcription factor EC
Tfrc	Transferrin receptor
Tgfb3	Transforming growth factor, beta 3
Tgfbi	Transforming growth factor, beta induced
Thbd	Thrombomodulin
Thbs2	Thrombospondin 2
Thsd7a	Thrombospondin, type I, domain containing 7A
Timm10	Translocase of inner mitochondrial membrane 10 homolog
Timm17a	Translocase of inner mitochondrial membrane 17 homolog A
Timm21	Translocase of inner mitochondrial membrane 21 homolog
Timm8a1	Translocase of inner mitochondrial membrane 8 homolog A1
Timm8b	Translocase of inner mitochondrial membrane 8 homolog b
Timp3	PREDICTED: TIMP metallopeptidase inhibitor 3
Tlr12	PREDICTED: toll-like receptor 12
Tlr13	PREDICTED: toll-like receptor 13
Tlr3	PREDICTED: toll-like receptor 3
Tmc1	Transmembrane channel-like gene family 1
Tmco2	PREDICTED: transmembrane and coiled-coil domains 2
Tmem110	Transmembrane protein 110
Tmem116	Transmembrane protein 116
Tmem121	PREDICTED: transmembrane protein 121
Tmem129	Transmembrane protein 129
Tmem135	Transmembrane protein 135
Tmem14a	Transmembrane protein 14A
Tmem150a	Transmembrane protein 150A
Tmem161b	PREDICTED: transmembrane protein 161B
Tmem170b	Ac1258 mRNA, complete cds.
Tmem171	Transmembrane protein 171
Tmem179	Transmembrane protein 179
Tmem185b	Transmembrane protein 185B
Tmem204	Transmembrane protein 204
Tmem229b	Transmembrane protein 229B
Tmem245	PREDICTED: transmembrane protein 245
Tmem246	Transmembrane protein 246
Tmem258b	PREDICTED: transmembrane protein 258 B
Tmem38a	Transmembrane protein 38a
Tmem41a	Transmembrane protein 41a
Tmem41b	Transmembrane protein 41B
Tmem44	PREDICTED: transmembrane protein 44
Tmem64	PREDICTED: transmembrane protein 64
Tmem65	Transmembrane protein 65
Tmem86a	Transmembrane protein 86A
Tmsb10	Thymosin, beta 10
Tnfaip8	Tumor necrosis factor, alpha-induced protein 8
Tnfsf9	Tumor necrosis factor
Tnik	PREDICTED: TRAF2 and NCK interacting kinase
Tnnt3	Troponin T type 3
Tnxb	Tenascin XB
Tob1	Transducer of ErbB-2.1
Tob2	Transducer of ERBB2, 2
Tom1l2	PREDICTED: target of myb1-like 2
Tomm22	Translocase of outer mitochondrial membrane 22 homolog
Tomm40l	Translocase of outer mitochondrial membrane 40 homolog
Tp53inp2	Tumor protein p53 inducible nuclear protein 2
Tpbgl	PREDICTED: trophoblast glycoprotein-like
Tpcn1	Two pore segment channel 1
Tppp3	Tubulin polymerization-promoting protein family member 3
Tpra1	Transmembrane protein, adipocyte asscociated 1
Tpst1	Tyrosylprotein sulfotransferase 1
Trabd	TraB domain containing
Trak1	Trafficking protein, kinesin binding 1
Trak2	Trafficking protein, kinesin binding 2
Tril	TLR4 interactor with leucine-rich repeats
Trim35	Tripartite motif-containing 35
Trim45	Tripartite motif-containing 45
Trim47	Tripartite motif-containing 47
Trim55	Tripartite motif-containing 55
Trim7	PREDICTED: tripartite motif-containing 7
Trip11	PREDICTED: thyroid hormone receptor interactor 11
Trnp1	PREDICTED: TMF1-regulated nuclear protein 1
Trpc1	Transient receptor potential cation channel, subfamily C, member 1
Trpc3	Transient receptor potential cation channel, subfamily C, member 3
Tspan9	Tetraspanin 9
Ttc7b	PREDICTED: tetratricopeptide repeat domain 7B
Ttn	PREDICTED: titin
Tuba1a	Tubulin, alpha 1A
Tuba4a	Tubulin, alpha 4A
Tuba8	Tubulin, alpha 8
Tubb4b	Tubulin, beta 4B class IVb
Tubg1	Tubulin, gamma 1
Tulp3	PREDICTED: tubby-like protein 3
Twf2	Twinfilin actin-binding protein 2
Twf2-ps1	PREDICTED: twinfilin, actin-binding protein, homolog 2
Tymp	Thymidine phosphorylase
Uap1l1	UDP-N-acteylglucosamine pyrophosphorylase 1-like 1
Uba7	Ubiquitin-like modifier activating enzyme 7
Ubac1	UBA domain containing 1
Ube2i	PREDICTED: ubiquitin-conjugating enzyme E2I
Ube2ql1	Ubiquitin-conjugating enzyme E2Q family-like 1
Ubiad1	UbiA prenyltransferase domain containing 1
Ubl4a	Ubiquitin-like 4A
Ubtd1	Ubiquitin domain containing 1
Ubtf	Upstream binding transcription factor, RNA polymerase I
Ucp3	Uncoupling protein 3
Unc119	UNC-119 homolog
Unc119b	Unc-119 homolog B
Unc5b	PREDICTED: unc-5 homolog B
Uqcc1	PREDICTED: ubiquinol-cytochrome c reductase complex assembly factor 1
Uqcc2	Ubiquinol-cytochrome c reductase complex assembly factor 2
Uqcrb	Ubiquinol-cytochrome c reductase binding protein
Uros	PREDICTED: uroporphyrinogen III synthase
Usp15	PREDICTED: ubiquitin specific peptidase 15
Usp18	Ubiquitin specific peptidase 18
Usp2	Ubiquitin specific peptidase 2
Usp28	Ubiquitin specific peptidase 28
Usp43	Ubiquitin specific peptidase 43
Usp45	Ubiquitin specific peptidase 45
Usp9x	Ubiquitin specific peptidase 9, X-linked
Vash2	Vasohibin 2
Vasn	Vasorin
Vav2	Vav 2 guanine nucleotide exchange factor
Vcl	Vinculin
Vegfb	Vascular endothelial growth factor B
Veph1	Ventricular zone expressed PH domain-containing 1
Vipas39	VPS33B interacting protein, apical-basolateral polarity regulator, spe-39 homolog
Vipr1	Vasoactive intestinal peptide receptor 1
Vipr2	Vasoactive intestinal peptide receptor 2
Vkorc1	Vitamin K epoxide reductase complex, subunit 1
Vldlr	PREDICTED: very low density lipoprotein receptor
Vof16	Ischemia related factor vof-16
Vom1r37	Vomeronasal 1 receptor 37
Vom2r35	Vomeronasal 2 receptor, 35
Vom2r-ps135	PREDICTED: vomeronasal 2 receptor, pseudogene 135 (Vom2r-ps135), transcript variant X2, misc_RNA
Vps37b	Vacuolar protein sorting 37 homolog B
Vstm4	V-set and transmembrane domain containing 4
Vtn	Vitronectin
Vwa7	Von Willebrand factor A domain containing 7
Wdr1	WD repeat domain 1
Wdr83os	WD repeat domain 83 opposite strand
Wipf3	WAS/WASL interacting protein family, member 3
Wnt11	Wingless-type MMTV integration site family, member 11
Wnt5b	Wingless-type MMTV integration site family, member 5B
Wnt9a	Wingless-type MMTV integration site family, member 9A
Wrnip1	Werner helicase interacting protein 1
Xcl1	C-X-C motif chemokine ligand 14
Xrcc6bp1	XRCC6 binding protein 1
Xylt2	Xylosyltransferase II
Yif1a	Yip1 interacting factor homolog A
Zbtb48	Zinc finger and BTB domain containing 48
Zdhhc1	Zinc finger, DHHC-type containing 1
Zdhhc15	PREDICTED: zinc finger, DHHC-type containing 15
Zdhhc2	Zinc finger, DHHC-type containing 2
Zeb1	Zinc finger E-box binding homeobox 1
Zfp14	ZFP14 zinc finger protein
Zfp238	PREDICTED: zinc finger protein 238
Zfp386	PREDICTED: zinc finger protein 386
Zfp606	PREDICTED: zinc finger protein 606
Zfp618	PREDICTED: zinc finger protein 618
Zfp629	Zinc finger protein 629
Zfp641	Zinc finger protein 641
Zfp689	Zinc finger protein 689
Zfp770	PREDICTED: zinc finger protein 770
Zfp775	Zinc finger protein 775
Zfp91	Zinc finger protein 91
Zfp955a	Zinc finger protein 955A
Zfpm1	Zinc finger protein, multitype 1
Zfyve16	PREDICTED: zinc finger, FYVE domain containing 16
Zgpat	Zinc finger, CCCH-type with G patch domain
Zmiz2	Zinc finger, MIZ-type containing 2
Znf48	PREDICTED: zinc finger protein 48
Zranb3	PREDICTED: zinc finger, RAN-binding domain containing 3
Zscan18	PREDICTED: zinc finger and SCAN domain containing 18

## Sheet: Femelle UP in CLP
List of the 506 genes in female significantly up-regulated in CLP vs SHAM (SAM 2, FDR<0,01). The common genes between male and female are found in blue.
Gene	Description
AA946080	EST201579 Normalized rat lung, Bento Soares Rattus sp
Aacs	Acetoacetyl-CoA synthetase
Aak1	AP2 associated kinase 1
Abca1	ATP binding cassette subfamily A member 1
Abcg1	ATP binding cassette subfamily G member 1
Abl1	ABL proto-oncogene 1, non-receptor tyrosine kinase
Abr	Active BCR-related
Acaa1a	Acetyl-CoA acyltransferase 1
Acaa1b	Acetyl-Coenzyme A acyltransferase 1B
Acaca	Acetyl-CoA carboxylase alpha
Ace	Angiotensin I converting enzyme
Acer2	Alkaline ceramidase 2
Acss2	Acyl-CoA synthetase short-chain family member 2
Actn3	Actinin alpha 3
Acvr1b	Activin A receptor type 1B
Adam33	ADAM metallopeptidase domain 33
Adamtsl2	ADAMTS-like 2
Adgra1	PREDICTED: adhesion G protein-coupled receptor A1
Adgre1	Adhesion G protein-coupled receptor E1
AF050661	Activity and neurotransmitter-induced early gene 9
Agfg1	ArfGAP with FG repeats 1
Agfg2	ArfGAP with FG repeats 2
Amdhd2	Amidohydrolase domain containing 2
Ankrd2	Ankyrin repeat domain 2
Ankrd23	Ankyrin repeat domain 23
Ankrd28	PREDICTED: ankyrin repeat domain 28
Anp32b	Acidic nuclear phosphoprotein 32 family member B
Ap3s1	Adaptor-related protein complex 3, sigma 1 subunit
Aqp1	Aquaporin 1
Arfgap3	ADP-ribosylation factor GTPase activating protein 3
Arhgap10	Rho GTPase activating protein 10
Arid5b	AT-rich interaction domain 5B
Arrdc3	PREDICTED: arrestin domain containing 3
Arsg	Arylsulfatase G
Asns	PREDICTED: asparagine synthetase
Asxl1	ADditional sex combs like 1
Atg13	Autophagy related 13
Atp1b3	ATPase Na+/K+ transporting subunit beta 3
Atraid	All-trans retinoic acid-induced differentiation factor
Avpi1	Arginine vasopressin-induced 1
AW914998	EST346302 Normalized rat ovary, Bento Soares Rattus sp. cDNA clone RGIBN31 5' end sequence
B4galt1	Beta-1,4-galactosyltransferase 1
Bbs2	Bardet-Biedl syndrome 2
BC098778	cDNA clone IMAGE:7374368
Bcat1	Branched chain amino acid transaminase 1
Bcl2l1	Bcl2-like 1
BF563581	cDNA clone UI-R-C4-alh-e-09-0-UI 5' sequence
BF564093	cDNA clone UI-R-C4-ald-d-09-0-UI 5' sequence
BF565662	cDNA clone UI-R-BT1-ako-f-11-0-UI 5' sequence
Bmx	BMX non-receptor tyrosine kinase
Boc	PREDICTED: BOC cell adhesion associated, oncogene regulated
Btbd9	PREDICTED: BTB domain containing 9
Btd	Biotinidase
Btf3l4	PREDICTED: basic transcription factor 3-like 4
C3	Complement C3
Capg	Capping actin protein, gelsolin like
Carhsp1	Calcium regulated heat stable protein 1
Cast	Calpastatin
Cblb	Cbl proto-oncogene B
Cby3	Chibby family member 3
Ccdc136	Coiled-coil domain containing 136
Ccdc181	Coiled-coil domain containing 181
Ccdc28b	Coiled coil domain containing 28B
Cd68	Cd68 molecule
Cd99l2	CD99 molecule-like 2
Cda	Cytidine deaminase
Cdh16	Cadherin 16
Cdh2	Cadherin 2
Cdo1	Cysteine dioxygenase type 1
Cds2	CDP-diacylglycerol synthase 2
Cenpa	Centromere protein A
Cerk	Ceramide kinase
Ces1c	Carboxylesterase 1C
Ces1d	Carboxylesterase 1D
CF114236	SHultzomica07487 Rat lung airway and parenchyma cDNA libraries cDNA clone NA4853 5' sequence
Cfdp1	Craniofacial development protein 1
Chi3l1	Chitinase 3 like 1
Chst11	PREDICTED: carbohydrate
Cib1	Calcium and integrin binding 1
Cirbp	Cold inducible RNA binding protein
CK839132	cDNA clone UI-R-AE1-zj-h-05-0-UI 3' sequence
Clcn2	Chloride channel, voltage-sensitive 2
Clec4a1	C-type lectin domain family 4, member A1
Clec4a2	C-type lectin domain family 4, member A2
Clec4a3	Q5YIS0_RAT
Clic5	Chloride intracellular channel 5
Clstn2	PREDICTED: calsyntenin 2
Cltb	Clathrin, light chain B
Clu	Clusterin
Cnppd1	Cyclin Pas1/PHO80 domain containing 1
Cog5	COmponent of oligomeric golgi complex 5
Coq8b	Coenzyme Q8B
Cpm	Carboxypeptidase M
Cpne8	Copine 8
Crem	CAMP responsive element modulator
Csf3	Colony stimulating factor 3
Csgalnact2	Chondroitin sulfate N-acetylgalactosaminyltransferase 2
Csnk1a1	Casein kinase 1, alpha 1
Ctps2	CTP synthase 2
Ctsl	Cathepsin L
Cttn	Cortactin
Cux1	PREDICTED: cut-like homeobox 1
Cxcl13	C-X-C motif chemokine ligand 13
Cyb561	Cytochrome b-561
Cyp4b1	Cytochrome P450, family 4, subfamily b, polypeptide 1
Dclre1a	DNA cross-link repair 1A
Ddt	D-dopachrome tautomerase
Ddx24	DEAD-box helicase 24
Dgke	Diacylglycerol kinase epsilon
Dmbt1	Deleted in malignant brain tumors 1
Drap1	Dr1 associated protein 1
Dse	Dermatan sulfate epimerase
DV722285	RVL13720 Wackym-Soares normalized rat vestibular cDNA library cDNA 5' sequence
Eda	Ectodysplasin-A
Efna5	PREDICTED: ephrin A5
Ehbp1	EH domain binding protein 1
Eif1a	PREDICTED: eukaryotic translation initiation factor 1A
Eif4ebp1	Eukaryotic translation initiation factor 4E binding protein 1
Ell	Elongation factor for RNA polymerase II
Enpp3	Ectonucleotide pyrophosphatase/phosphodiesterase 3
ENSRNOT00000015113	Integrin subunit alpha 9
ENSRNOT00000016157	NOn-SMC condensin I complex, subunit H
ENSRNOT00000026748	Integrin subunit alpha D
ENSRNOT00000029774	Fatty acid-binding protein, epidermal pseudogene
ENSRNOT00000038212	Unknown
ENSRNOT00000039797	Paired immunoglobulin-like type 2 receptor alpha-like
ENSRNOT00000040034	POtassium voltage-gated channel subfamily Q member 5
ENSRNOT00000050834	TEA domain transcription factor 4
ENSRNOT00000055893	Uncharacterized LOC108351584
ENSRNOT00000068118	Similar to paired immunoglobin-like type 2 receptor beta
ENSRNOT00000074057	Similar to paired immunoglobin-like type 2 receptor beta
ENSRNOT00000074647	Unknown
ENSRNOT00000075606	Family with sequence similarity 131, member A
ENSRNOT00000075631	Similar to Fatty acid-binding protein, epidermal
ENSRNOT00000076105	PREDICTED: uncharacterized LOC100910821
ENSRNOT00000079573	ZInc finger with KRAB and SCAN domains 5
ENSRNOT00000085605	KRI1 homolog
ENSRNOT00000088270	Solute carrier family 2 member 3
Epb41	ERythrocyte membrane protein band 4.1
Epha7	Eph receptor A7
Ern1	Endoplasmic reticulum to nucleus signaling 1
Exosc1	EXosome component 1
Fabp5	Fatty acid binding protein 5, epidermal
Fam161a	Family with sequence similarity 161, member A
Fam188b	Family with sequence similarity 188, member B
Fam229b	Family with sequence similarity 229, member B
Fam24a	Unknown
Fam3a	Family with sequence similarity 3, member A
Fam46a	PREDICTED: family with sequence similarity 46, member A
Fcgr2b	Fc fragment of IgG receptor IIb
Fgf2	Fibroblast growth factor 2
Fgr	FGR proto-oncogene, Src family tyrosine kinase
Fhad1	FOrkhead associated phosphopeptide binding domain 1
Fhdc1	FH2 domain containing 1
Fhl1	Four and a half LIM domains 1
Flot1	Flotillin 1
Flot2	Flotillin 2
Flrt2	PREDICTED: fibronectin leucine rich transmembrane protein 2
FM092177	FM092177 etnofat cDNA clone etnofatP0022G03 5' sequence
FM127585	FM127585 etnokid cDNA clone etnokidP0014H12 5' sequence
Fndc3b	PREDICTED: fibronectin type III domain containing 3B
Foxo3	Forkhead box O3
Foxp1	PREDICTED: forkhead box P1
Foxq1	Forkhead box Q1
FQ212606	Unknown
FQ220266	Unknown
FQ233225	Unknown
FQ235171	UI-R-C1-ky-a-06-0-UI.r1 UI-R-C1 cDNA clone UI-R-C1-ky-a-06-0-UI 5' sequence
Fst	Follistatin
Fstl3	Follistatin like 3
Fto	FTO, alpha-ketoglutarate dependent dioxygenase
Gal	Galanin and GMAP prepropeptide
Galr2	Galanin receptor 2
Gas7	Growth arrest specific 7
Gba	Glucosylceramidase beta
Gcs1	Glucosidase 1
Gja5	Gap junction protein, alpha 5
Glul	Gutamate-ammonia ligase (glutamine synthetase)
Gnat2	G protein subunit alpha transducin 2
Gnptab	PREDICTED: N-acetylglucosamine-1-phosphate transferase, alpha and beta subunits
Gphn	Gephyrin
Gprc5d	G protein-coupled receptor, class C, group 5, member D
Greb1	GRowth regulation by estrogen in breast cancer 1
Grk3	PREDICTED: G protein-coupled receptor kinase 3
Grk5	G protein-coupled receptor kinase 5
Gss	Glutathione synthetase
Gstt2	Glutathione S-transferase, theta 2
H6pd	Hexose-6-phosphate dehydrogenase
Hamp	Hepcidin antimicrobial peptide
Hapln2	Hyaluronan and proteoglycan link protein 2
Hck	HCK proto-oncogene, Src family tyrosine kinase
Hdac11	Histone deacetylase 11
Hdac6	HIstone deacetylase 6
Hgf	HEpatocyte growth factor
Hipk1	Homeodomain interacting protein kinase 1
Hipk3	Homeodomain interacting protein kinase 3
Hmcn2	PREDICTED: hemicentin 2
Hmox1	Heme oxygenase 1
Homer3	Homer scaffolding protein 3
Hoxb6	PREDICTED: homeo box B6
Hpf1	Histone PARylation factor 1
Hpgds	PREDICTED: hematopoietic prostaglandin D synthase
Hsd11b1	Hydroxysteroid 11-beta dehydrogenase 1
Iffo1	Intermediate filament family orphan 1
Igf1r	Insulin-like growth factor 1 receptor
Il17ra	Interleukin 17 receptor A
Il18	Interleukin 18
Il1r2	Interleukin 1 receptor type 2
Il6r	Interleukin 6 receptor
Impdh2	Inosine monophosphate dehydrogenase 2
Incenp	Inner centromere protein
Ip6k1	Inositol hexakisphosphate kinase 1
Ipo4	Importin 4
Ippk	Inositol-pentakisphosphate 2-kinase
Itgb2	Integrin subunit beta 2
Itgb8	Integrin subunit beta 8
Itpa	Inosine triphosphatase
Jade2	PREDICTED: jade family PHD finger 2
Jam2	Junctional adhesion molecule 2
Jmjd1c	Jumonji domain containing 1C
Kcnk1	Potassium two pore domain channel subfamily K member 1
Kcnmb4	Potassium calcium-activated channel subfamily M regulatory beta subunit 4
Kdsr	3-ketodihydrosphingosine reductase
Khk	Ketohexokinase
Krt1	Keratin 1
Lars	Leucyl-tRNA synthetase
Lbp	Lipopolysaccharide binding protein
Lcn2	Lipocalin 2
Lgals3	Lectin, galactoside-binding, soluble, 3
Lnx2	Ligand of numb-protein X 2
LOC100158225	Hypothetical protein LOC100158225
LOC100909539	Uncharacterized LOC100909539
LOC100909860	PREDICTED: uncharacterized LOC100909860
LOC100910424	PREDICTED: uncharacterized LOC100910424
LOC100911671	PREDICTED: uncharacterized LOC100911671
LOC100912031	PREDICTED: uncharacterized LOC100912031
LOC100912084	PREDICTED: cAMP-dependent protein kinase catalytic subunit PRKX-like
LOC100912353	PREDICTED: uncharacterized LOC100912353
LOC100912629	PREDICTED: uncharacterized LOC100912629
LOC102546966	PREDICTED: uncharacterized LOC102546966
LOC102547189	PREDICTED: uncharacterized LOC102547189
LOC102548193	PREDICTED: uncharacterized LOC102548193
LOC102548719	PREDICTED: uncharacterized LOC102548719
LOC102548772	PREDICTED: uncharacterized LOC102548772
LOC102549144	PREDICTED: uncharacterized LOC102549144
LOC102549211	PREDICTED: uncharacterized LOC102549211
LOC102549532	PREDICTED: uncharacterized LOC102549532
LOC102550011	PREDICTED: uncharacterized LOC102550011
LOC102550100	PREDICTED: uncharacterized LOC102550100
LOC102550584	PREDICTED: hornerin-like
LOC102552250	PREDICTED: uncharacterized LOC102552250
LOC102552818	PREDICTED: uncharacterized LOC102552818
LOC102553232	PREDICTED: uncharacterized LOC102553232
LOC102553902	PREDICTED: uncharacterized LOC102553902
LOC102554727	PREDICTED: uncharacterized LOC102554727
LOC102555570	PREDICTED: uncharacterized LOC102555570
LOC102556004	PREDICTED: uncharacterized LOC102556004
LOC102556148	PREDICTED: probable N-acetyltransferase CML2-like
LOC102556298	PREDICTED: rho GTPase-activating protein 20-like
LOC102556346	PREDICTED: angiotensin-converting enzyme-like
LOC103689992	40S ribosomal protein S9
LOC103690500	PREDICTED: uncharacterized LOC103690500
LOC103690680	PREDICTED: uncharacterized LOC103690680
LOC103691165	PREDICTED: uncharacterized LOC103691165
LOC103691381	PREDICTED: uncharacterized LOC103691381
LOC103691468	PREDICTED: uncharacterized LOC103691468
LOC103691972	PREDICTED: uncharacterized LOC103691972
LOC103692821	PREDICTED: uncharacterized LOC103692821
LOC103693329	PREDICTED: uncharacterized LOC103693329
LOC103693530	PREDICTED: uncharacterized LOC103693530
LOC103693804	PREDICTED: uncharacterized LOC103693804
LOC103694288	PREDICTED: uncharacterized LOC103694288
LOC103694992	PREDICTED: uncharacterized LOC103694992
LOC103695224	PREDICTED: uncharacterized LOC103695224
LOC108352161	PREDICTED: uncharacterized LOC108352161
LOC108353656	PREDICTED: deleted in malignant brain tumors 1 protein-like
LOC291863	Carboxylesterase-like
LOC316124	Similar to gonadotropin-regulated long chain acyl-CoA synthetase
LOC680875	SImilar to dystonin isoform 1
LOC680910	PREDICTED: similar to paired immunoglobin-like type 2 receptor beta
LOC680933	PREDICTED: similar to nidogen 2
LOC681177	PREDICTED: rho GTPase-activating protein 20-like
LOC681186	PREDICTED: hypothetical protein LOC681186
LOC685157	Similar to paired immunoglobin-like type 2 receptor beta
LOC688126	PREDICTED: hypothetical protein LOC688126
LOC689959	Hypothetical protein LOC689959
Lpar6	Lysophosphatidic acid receptor 6
Lpin2	Lipin 2
Lrp1	LDL receptor related protein 1
Lst1	Leukocyte specific transcript 1
Lvrn	PREDICTED: laeverin
Lyz2	Lysozyme 2
Man1a1	Mannosidase, alpha, class 1A, member 1
Map1lc3b	Microtubule-associated protein 1 light chain 3 beta
Map7	Microtubule-associated protein 7
Mapk14	RNU91847 p38 mitogen activated protein kinase
Mapre2	Microtubule-associated protein, RP/EB family, member 2
March3	Membrane associated ring-CH-type finger 3
Mcl1	BCL2 family apoptosis regulator
Mcm3ap	Minichromosome maintenance complex component 3 associated protein
Mcm4	Minichromosome maintenance complex component 4
Mcmbp	Minichromosome maintenance complex binding protein
Mgat5	Mannosyl (alpha-1,6-)-glycoprotein beta-1,6-N-acetyl-glucosaminyltransferase
MGC93861	Hypothetical protein LOC682010
Mgst2	Microsomal glutathione S-transferase 2
Mical3	Microtubule associated monoxygenase, calponin and LIM domain containing 3
Mmp14	Matrix metallopeptidase 14
Mmp24	Matrix metallopeptidase 24
Mrap	Melanocortin 2 receptor accessory protein
Mrps27	Mitochondrial ribosomal protein S27
Ms4a6a	PREDICTED: membrane spanning 4-domains A6A
Msantd3	Myb/SANT DNA binding domain containing 3
Msr1	Macrophage scavenger receptor 1
Mt2A	Metallothionein 2A
Mturn	Maturin, neural progenitor differentiation regulator homolog
Mtus2	PREDICTED: microtubule associated tumor suppressor candidate 2
Mxd4	Max dimerization protein 4
Mybbp1a	MYB binding protein 1a
Mybpc2	Myosin binding protein C, fast-type
Myot	Myotilin
Myrfl	Myelin regulatory factor-like
N4bp2l1	NEDD4 binding protein 2-like 1
Nadk	NAD kinase
Nap1l1	Nucleosome assembly protein 1-like 1
Nap1l5	Nucleosome assembly protein 1-like 5
Nat6	N-acetyltransferase 6
Nbea	PREDICTED: neurobeachin
Ncam1	PREDICTED: neural cell adhesion molecule 1
Ncf4	Neutrophil cytosolic factor 4
Net1	Neuroepithelial cell transforming 1
Neurl1	NEuralized E3 ubiquitin protein ligase 1
Nfx1	Nuclear transcription factor, X-box binding 1
Nisch	PREDICTED: nischarin
Nnat	Neuronatin
Nol3	Nucleolar protein 3
Nr2c2ap	Nuclear receptor 2C2-associated protein
Nrbp2	PREDICTED: nuclear receptor binding protein 2
Nucb2	Nucleobindin 2
Nup210	Nucleoporin 210
Nup93	Nucleoporin 93
Ogfrl1	Opioid growth factor receptor-like 1
Orm1	Orosomucoid 1
Otulin	OTU deubiquitinase with linear linkage specificity
Paox	Polyamine oxidase
Pappa1	Pregnancy-associated plasma protein A
Paqr8	PREDICTED: progestin and adipoQ receptor family member 8
Parm1	Prostate androgen-regulated mucin-like protein 1
Pcnt	PEricentrin
Pde10a	Phosphodiesterase 10A
Pde7b	Phosphodiesterase 7B
Pdlim2	PDZ and LIM domain 2
Pdlim5	PREDICTED: PDZ and LIM domain 5
Pes1	Pescadillo ribosomal biogenesis factor 1
Pgap2	Post-GPI attachment to proteins 2
Pgrmc2	Progesterone receptor membrane component 2
Phactr2	PREDICTED: phosphatase and actin regulator 2
Phyhd1	Phytanoyl-CoA dioxygenase domain containing 1
Pla2g2a	Phospholipase A2 group IIA
Plcb3	PREDICTED: phospholipase C beta 3
Plekhh2	PREDICTED: pleckstrin homology, MyTH4 and FERM domain containing H2
Plp2	Proteolipid protein 2
Plpp1	Phospholipid phosphatase 1
Ppp2ca	Protein phosphatase 2, catalytic subunit, alpha isozyme
Ppp4r1	Protein phosphatase 4, regulatory subunit 1
Pram1	PML-RARA regulated adaptor molecule 1
Prg4	Proteoglycan 4
Prmt9	Protein arginine methyltransferase 9
Prr16	Proline rich 16
Pstpip1	Proline-serine-threonine phosphatase-interacting protein 1
Ptpn14	Protein tyrosine phosphatase, non-receptor type 14
Ptpn2	Protein tyrosine phosphatase, non-receptor type 2
Ptpn6	Protein tyrosine phosphatase, non-receptor type 6
Ptprd	PRotein tyrosine phosphatase, receptor type, D
Ptprf	Protein tyrosine phosphatase, receptor type, F
Ptprn	PRotein tyrosine phosphatase, receptor type, N
Pum3	Pumilio RNA-binding family member 3
Pxk	PX domain containing serine/threonine kinase
Pyroxd1	Pyridine nucleotide-disulphide oxidoreductase domain 1
Rab30	PREDICTED: RAB30, member RAS oncogene family
Rab31	RAB31, member RAS oncogene family
Rabgap1l	PREDICTED: RAB GTPase activating protein 1-like
Rabggta	Rab geranylgeranyltransferase, alpha subunit
Rac2	Ras-related C3 botulinum toxin substrate 2
Rad9b	RAD9 checkpoint clamp component B
Ranbp9	PREDICTED: RAN binding protein 9
Rapgef4	RAp guanine nucleotide exchange factor 4
Rasgef1c	RasGEF domain family, member 1C
Rcan2	REgulator of calcineurin 2
Rcl1	RNA terminal phosphate cyclase-like 1
Rec8	REC8 meiotic recombination protein
Reep2	Receptor accessory protein 2
Reg3a	Regenerating islet-derived 3 alpha
Reg3b	Regenerating family member 3 beta
Reg3g	Regenerating family member 3 gamma
Rfx2	Regulatory factor X2
RGD1304963	SImilar to hypothetical protein MGC38716
RGD1305455	Similar to hypothetical protein FLJ10925
RGD1311756	Similar to hypothetical protein FLJ20950
RGD1559909	RGD1559909
RGD1560281	SImilar to cell surface receptor FDFACT
RGD1561143	PREDICTED: similar to cell surface receptor FDFACT
RGD1561730	PREDICTED: similar to cell surface receptor FDFACT
RGD1561796	RGD1561796
RGD1562525	PREDICTED: similar to cell surface receptor FDFACT
RGD1562608	PREDICTED: similar to KIAA1328 protein
RGD1563365	Similar to DNA segment, Chr 10, Wayne State University 102, expressed
RGD1564664	Similar to LOC387763 protein
RGD1566006	PREDICTED: similar to paired immunoglobin-like type 2 receptor beta
Rnf144b	Ring finger protein 144B
Rpl10a	Ribosomal protein L10A
Rprml	Reprimo-like
Rps6ka5	Ribosomal protein S6 kinase A5
Rrp12	RIbosomal RNA processing 12 homolog
Rrp36	PREDICTED: ribosomal RNA processing 36
Rsph1	Radial spoke head 1 homolog
S100a8	S100 calcium binding protein A8
Saal1	PREDICTED: serum amyloid A-like 1
Sardh	SArcosine dehydrogenase
Scamp1	Secretory carrier membrane protein 1
Scgb2a2	Secretoglobin, family 2A, member 2
Scp2	Sterol carrier protein 2
Sec16b	SEC16 homolog B, endoplasmic reticulum export factor
Serpina3n	Serine (or cysteine) peptidase inhibitor, clade A, member 3N
Sfmbt2	PREDICTED: Scm-like with four mbt domains 2
Sfrp1	Secreted frizzled-related protein 1
Sgpl1	Sphingosine-1-phosphate lyase 1
Sgsm3	Small G protein signaling modulator 3
Siglec5	Sialic acid binding Ig-like lectin 5
Slamf9	SLAM family member 9
Slc10a6	Solute carrier family 10 member 6
Slc11a1	Solute carrier family 11 member 1
Slc13a4	PREDICTED: solute carrier family 13 member 4
Slc25a14	Solute carrier family 25 member 14
Slc2a1	Solute carrier family 2 member 1
Slc39a1	Solute carrier family 39 member 1
Slc39a6	Solute carrier family 39 member 6
Slc43a2	Solute carrier family 43 member 2
Slc44a2	Solute carrier family 44 member 2
Slco2a1	Solute carrier organic anion transporter family, member 2a1
Slpi	Secretory leukocyte peptidase inhibitor
Slpil2	Antileukoproteinase-like 2
Slpil3	Antileukoproteinase-like 3
Snx29	PREDICTED: sorting nexin 29
Spata24	Spermatogenesis associated 24
Spon1	Spondin 1
Spred3	PREDICTED: sprouty-related, EVH1 domain containing 3
Sqstm1	Sequestosome 1
St3gal1	ST3 beta-galactoside alpha-2,3-sialyltransferase 1
St7l	Suppression of tumorigenicity 7-like
Stat3	Signal transducer and activator of transcription 3
Steap4	STEAP4 metalloreductase
Stt3b	STT3B, catalytic subunit of the oligosaccharyltransferase complex
Sulf1	Sulfatase 1
Tbx20	T-box 20
TC605380	Unknown
TC609630	Unknown
TC639546	Unknown
Tead1	TEA domain transcription factor 1
Tf	Transferrin
Tgfb2	Transforming growth factor, beta 2
Tgfbr2	Transforming growth factor, beta receptor 2
Tgif1	TGFB-induced factor homeobox 1
Tgm1	Transglutaminase 1
Thnsl2	Threonine synthase-like 2
Tinagl1	Tubulointerstitial nephritis antigen-like 1
Tle1	Transducin like enhancer of split 1
Tmbim1	Transmembrane BAX inhibitor motif containing 1
Tmem100	Transmembrane protein 100
Tmem108	Transmembrane protein 108
Tmem234	PREDICTED: transmembrane protein 234
Tmem53	Transmembrane protein 53
Tmem63c	Transmembrane protein 63c
Tmem8a	Transmembrane protein 8A
Tmtc1	PREDICTED: transmembrane and tetratricopeptide repeat containing 1
Tom1	Target of myb1 membrane trafficking protein
Tp53i3	Tumor protein p53 inducible protein 3
Tp53inp1	PREDICTED: tumor protein p53 inducible nuclear protein 1
Tpm3	Tropomyosin 3
Tprn	Taperin
Trh	Thyrotropin releasing hormone
Trim25	Tripartite motif-containing 25
Trim54	Tripartite motif-containing 54
Tsc22d1	TSC22 domain family, member 1
Tspan1	Tetraspanin 1
Tspan14	Tetraspanin 14
Tspo2	PREDICTED: translocator protein 2
Ttc27	Tetratricopeptide repeat domain 27
Tuba1c	Tubulin, alpha 1C
Tyro3	TYRO3 protein tyrosine kinase
Uchl1	Ubiquitin C-terminal hydrolase L1
Uck2	Uridine-cytidine kinase 2
Ugt1a6	UDP glucuronosyltransferase family 1 member A6
Uhrf1bp1l	UHRF1 binding protein 1-like
Vamp5	Vesicle-associated membrane protein 5
Vezt	Vezatin, adherens junctions transmembrane protein
Vmp1	Vacuole membrane protein 1
Vwa1	Von Willebrand factor A domain containing 1
Wfdc21	WAP four-disulfide core domain 21
Wwtr1	WW domain containing transcription regulator 1
Ypel3	Yippee-like 3
Ypel5	Yippee-like 5
Zdhhc9	Zinc finger, DHHC-type containing 9
Zfp598	Zinc finger protein 598
Zfp697	PREDICTED: zinc finger protein 697
Zfp771	PREDICTED: zinc finger protein 771
Zw10	Zw10 kinetochore protein

## Sheet: Femelle Down in CLP
List of the 761 genes in female significantly down-regulated in CLP vs SHAM in female (SAM 2, FDR<0,01). The common genes between male and female are found in blue.
Gene	Description
Abca8a	ATP-binding cassette, subfamily A
Abca9	PREDICTED: ATP binding cassette subfamily A member 9
Abcc8	ATP binding cassette subfamily C member 8
Abcg3	ATP-binding cassette, subfamily G
Abhd14a	Abhydrolase domain containing 14A
Abhd16a	Abhydrolase domain containing 16A
Abhd8	Abhydrolase domain containing 8
Ackr3	Atypical chemokine receptor 3
Ackr4	PREDICTED: atypical chemokine receptor 4
Acot13	Acyl-CoA thioesterase 13
Acot7	Acyl-CoA thioesterase 7
Acsl1	Acyl-CoA synthetase long-chain family member 1
Actb	Actin, beta
Adamts2	ADAM metallopeptidase with thrombospondin type 1 motif, 2
Adamtsl3	ADAMTS-like 3
Adamtsl5	PREDICTED: ADAMTS-like 5
Adck1	AarF domain containing kinase 1
Adi1	Acireductone dioxygenase 1
Adprhl1	PREDICTED: ADP-ribosylhydrolase like 1
Adra1a	Adrenoceptor alpha 1A
Adra1b	Adrenoceptor alpha 1B
Adra1d	Adrenoceptor alpha 1D
Afap1l1	Actin filament associated protein 1-like 1
Afap1l2	Actin filament associated protein 1-like 2
Agpat3	1-acylglycerol-3-phosphate O-acyltransferase 3
AI045171	cDNA clone UI-R-C1-kk-e-12-0-UI 3' sequence
AI059907	cDNA clone UI-R-C1-kr-a-05-0-UI 3' sequence
Ajuba	Ajuba LIM protein
Ak1	Adenylate kinase 1
Akap1	A-kinase anchoring protein 1
Akap17b	A-kinase anchoring protein 17b
Akap6	A-kinase anchoring protein 6
Alad	Aminolevulinate dehydratase
Alas1	5'-aminolevulinate synthase 1
Amd1	Adenosylmethionine decarboxylase 1
Angpt1	Angiopoietin 1
Angptl2	Angiopoietin-like 2
Ankrd9	Ankyrin repeat domain 9
Anks1a	Ankyrin repeat and sterile alpha motif domain containing 1A
Anks4b	Ankyrin repeat and sterile alpha motif domain containing 4B
Anxa10	Annexin A10
Aox3	Aldehyde oxidase 3
Apln	Apelin
Apol3	Apolipoprotein L, 3
Ar	Androgen receptor
Arhgap15	Rho GTPase activating protein 15
Arhgap29	Rho GTPase activating protein 29
Arl15	PREDICTED: ADP-ribosylation factor like GTPase 15
Arl6ip5	ADP-ribosylation factor like GTPase 6 interacting protein 5
Arpc5l	Actin related protein 2/3 complex, subunit 5-like
Arsb	Arylsulfatase B
Asap2	PREDICTED: ArfGAP with SH3 domain, ankyrin repeat and PH domain 2
Asgr2	Asialoglycoprotein receptor 2
Asph	Aspartate-beta-hydroxylase
Atf5	Activating transcription factor 5
Atp1b1	ATPase Na+/K+ transporting subunit beta 1
Atp5s	ATP synthase, H+ transporting, mitochondrial Fo complex, subunit s
Atxn2	PREDICTED: ataxin 2
AW055727	ESTT2990722 Rat brain ESTs cDNA clone ESTT2990722 3' sequence
B2m	Beta-2 microglobulin
Batf2	PREDICTED: basic leucine zipper ATF-like transcription factor 2
BC086424	Unknown
BC089062	Q4VA50_MOUSE Nfib protein
BC098867	Unknown
Bcl6b	B-cell CLL/lymphoma 6B
Bend3	PREDICTED: BEN domain containing 3
BI283685	cDNA clone UI-R-CW0s-ccg-e-12-0-UI 3' sequence
BI289684	cDNA clone UI-R-DK0-cfi-h-08-0-UI 3' sequence
Bola1	BolA family member 1
Bpnt1	3' (2'), 5'-bisphosphate nucleotidase 1
BQ078968	EST594375 Rat gene index, normalized rat, norvegicus cDNA clone RGOAA58 3' end similar to immunophilin p59 sequence
Btnl9	Butyrophilin-like 9
C1qtnf1	C1q and tumor necrosis factor related protein 1
C2	Complement C2
CA503908	cDNA clone UI-R-FS1-cqe-a-24-0-UI 3' sequence
CA505987	cDNA clone UI-R-FJ0-cqa-i-23-0-UI 3' sequence
Cadps2	Calcium dependent secretion activator 2
Calr3	Calreticulin 3
Camk2n1	Calcium/calmodulin-dependent protein kinase II inhibitor 1
Cand2	Cullin-associated and neddylation-dissociated 2
Canx	Calnexin
Car11	Carbonic anhydrase 11
Casp7	Caspase 7
Cav3	Caveolin 3
CB556309	AMGNNUC:NRHY5-00135-A11-A W Rat hypothalamus
Cbx6	PREDICTED: chromobox 6
Ccdc141	Coiled-coil domain containing 141
Cck	Cholecystokinin
Ccl12	Chemokine (C-C motif) ligand 12
Ccnd1	Cyclin D1
Ccr5	Chemokine (C-C motif) receptor 5
Cct8l1	Chaperonin containing TCP1, subunit 8 (theta)-like 1
Cd274	CD274 molecule
Cd40	CD40 molecule
Cdc34	Cell division cycle 34
Cdk6	PREDICTED: cyclin-dependent kinase 6
Cfap52	Cilia and flagella associated protein 52
Chid1	Chitinase domain containing 1
Chrnd	Cholinergic receptor nicotinic delta subunit
Chst10	Carbohydrate sulfotransferase 10
Chst7	Carbohydrate sulfotransferase 7
Cisd3	CDGSH iron sulfur domain 3
Clcnkb	Chloride voltage-gated channel Kb
Cmpk2	Cytidine/uridine monophosphate kinase 2
Cmtm5	CKLF-like MARVEL transmembrane domain containing 5
Cnnm4	Cyclin and CBS domain divalent metal cation transport mediator 4
Cntln	Centlein
CO389165	cDNA clone IMAGE:7302579 5' sequence
CO398622	cDNA clone IMAGE:7316368 5' sequence
Coa6	PREDICTED: cytochrome c oxidase assembly factor 6
Coa7	Cytochrome c oxidase assembly factor 7
Col15a1	Collagen type XV alpha 1 chain
Col1a1	Collagen type I alpha 1 chain
Col1a2	Collagen type I alpha 2 chain
Col3a1	Collagen type III alpha 1 chain
Col5a1	Collagen type V alpha 1 chain
Col6a3	PREDICTED: collagen type VI alpha 3 chain
Col6a6	PREDICTED: collagen, type VI, alpha 6
Coprs	RVL4502 Wackym-Soares normalized rat vestibular cDNA library cDNA 5' sequence
Cox10	PREDICTED: COX10 heme A:farnesyltransferase cytochrome c oxidase assembly factor
Cox5b	Cytochrome c oxidase subunit 5B
Cox7a1	PREDICTED: cytochrome c oxidase subunit 7A1
Cox7a2l	Cytochrome c oxidase subunit 7A2 like
Cox7c	Cytochrome c oxidase subunit 7C
Crk	PREDICTED: CRK proto-oncogene, adaptor protein
Csf1	Colony stimulating factor 1
Cstf2t	Cleavage stimulation factor subunit 2, tau variant
Ctnnal1	Catenin alpha-like 1
Ctxn1	Cortexin 1
Cux2	PREDICTED: cut-like homeobox 2
CV075577	AGENCOURT_31475793 NIH_MGC_251 cDNA clone IMAGE:7388253 5' sequence
CV796411	UI-R-EB0-cln-e-10-0-UI.s1 UI-R-EB0 cDNA clone UI-R-EB0-cln-e-10-0-UI 3' sequence
Cx3cl1	C-X3-C motif chemokine ligand 1
Cxcl10	C-X-C motif chemokine ligand 10
Cxcl12	C-X-C motif chemokine ligand 12
Cxcl9	C-X-C motif chemokine ligand 9
Cyp11a1	Cytochrome P450, family 11, subfamily a, polypeptide 1
Cyp2j3	Cytochrome P450, family 2, subfamily j, polypeptide 3
Dbi	Diazepam binding inhibitor, acyl-CoA binding protein
Dbnl	Drebrin-like
Dbp	D-box binding PAR bZIP transcription factor
Ddo	D-aspartate oxidase
Ddr2	Discoidin domain receptor tyrosine kinase 2
Dhcr7	7-dehydrocholesterol reductase
Dhdds	Dehydrodolichyl diphosphate synthase subunit
Dhrs7c	Dehydrogenase/reductase 7C
Dhx35	DEAH-box helicase 35
Dlg2	PREDICTED: discs large MAGUK scaffold protein 2
Dll4	Delta like canonical Notch ligand 4
Dlst	PREDICTED: dihydrolipoamide S-succinyltransferase
Dnmt3a	PREDICTED: DNA methyltransferase 3 alpha
Dock4	PREDICTED: dedicator of cytokinesis 4
Dok7	Docking protein 7
Dpp4	Dipeptidylpeptidase 4
Drc3	Dynein regulatory complex subunit 3
Dsp	Desmoplakin
Dtx3l	Deltex E3 ubiquitin ligase 3L
DV725887	RVL18127 Wackym-Soares normalized rat vestibular cDNA library cDNA 5' sequence
DV727963	RVL20545 Wackym-Soares normalized rat vestibular cDNA library cDNA 5' sequence
Dyrk2	Dual specificity tyrosine phosphorylation regulated kinase 2
Ece2	Endothelin-converting enzyme 2
Echdc3	Enoyl CoA hydratase domain containing 3
Ecm2	Extracellular matrix protein 2
Efcc1	PREDICTED: EF-hand and coiled-coil domain containing 1
Efnb1	Ephrin B1
Efnb3	Ephrin B3
Eif2d	Eukaryotic translation initiation factor 2D
Eif4e3	Eukaryotic translation initiation factor 4E family member 3
Elfn2	PREDICTED: extracellular leucine-rich repeat and fibronectin type III domain containing 2
Elovl4	ELOVL fatty acid elongase 4
Emcn	Endomucin
ENSRNOT00000004016	Unknown
ENSRNOT00000004451	Similar to HRPAP20 short form
ENSRNOT00000014458	PITH domain containing 1
ENSRNOT00000017939	Gonadotropin releasing hormone 1
ENSRNOT00000022988	Coenzyme Q7, hydroxylase
ENSRNOT00000028483	Unknown
ENSRNOT00000029787	PREDICTED: epoxide hydrolase 1-like
ENSRNOT00000034097	Pleckstrin homology-like domain, family B, member 2
ENSRNOT00000050072	Transmembrane protein 161B
ENSRNOT00000050597	Leptin receptor
ENSRNOT00000064893	Fas-activated serine/threonine kinase
ENSRNOT00000067450	PREDICTED: palladin, cytoskeletal associated protein
ENSRNOT00000070899	IZUMO family member 2
ENSRNOT00000071131	Extracellular matrix protein 2-like
ENSRNOT00000073239	NLR family, CARD domain containing 5
ENSRNOT00000075236	Similar to Cytochrome c oxidase polypeptide VIIa-heart, mitochondrial precursor
ENSRNOT00000076472	Collagen type IV alpha 4 chain
ENSRNOT00000077503	Collagen type IV alpha 4 chain
ENSRNOT00000077637	Immunoreceptor Ly49si1
ENSRNOT00000082815	Similar to TL antigen
ENSRNOT00000082858	Transmembrane protein 258
ENSRNOT00000083245	Mitochondrial ribosomal protein L30
ENSRNOT00000085730	Kelch repeat and BTB domain containing 12
ENSRNOT00000089361	Uncharacterized LOC102547219
Epb41l4a	Erythrocyte membrane protein band 4.1 like 4A
Erap1	Endoplasmic reticulum aminopeptidase 1
Erbb3	Erb-b2 receptor tyrosine kinase 3
Ercc6l2	ERCC excision repair 6 like 2
Ermp1	Endoplasmic reticulum metallopeptidase 1
Erp44	Endoplasmic reticulum protein 44
Esrra	Estrogen related receptor, alpha
EV778306	AGENCOURT_114815584 NIH_MGC_433 cDNA clone IMAGE:9101516 5' sequence
Evc	EvC ciliary complex subunit 1
EX491204	AGENCOURT_118863839 NIH_MGC_252 cDNA clone IMAGE:9112356 5' sequence
Exoc3l4	Exocyst complex component 3-like 4
Extl1	Exostosin-like glycosyltransferase 1
Fam120b	Family with sequence similarity 120B
Fam124a	Family with sequence similarity 124 member A
Fam131c	Family with sequence similarity 131, member C
Fam171b	PREDICTED: family with sequence similarity 171, member B
Fam20a	FAM20A, golgi associated secretory pathway pseudokinase
Fam212b	Family with sequence similarity 212, member B
Fam26e	Family with sequence similarity 26, member E
Fam43b	Family with sequence similarity 43, member B
Fam46b	Family with sequence similarity 46, member B
Fam53b	Family with sequence similarity 53, member B
Fblim1	Filamin binding LIM protein 1
Fbln1	Fibulin 1
Fbrsl1	PREDICTED: fibrosin-like 1
Fbxl14	F-box and leucine-rich repeat protein 14
Fbxo40	PREDICTED: F-box protein 40
Fcer2	Fc fragment of IgE receptor II
Fcna	Ficolin A
Fdx1l	Ferredoxin 1-like
Fem1a	Fem-1 homolog A
Fkbp3	FK506 binding protein 3
Fkbp4	FK506 binding protein 4
FM073733	cDNA clone etnoaorP0017N02 5' sequence
Fmc1	Formation of mitochondrial complex V assembly factor 1
Fndc1	Fibronectin type III domain containing 1
FQ214383	AW916836 EST348049 Rat gene index, normalized rat, norvegicus, Bento Soares cDNA clone RGIDU28 5' end sequence
FQ220273	S77858 non-muscle myosin alkali light chain {Rattus sp.}
FQ226104	Q80US6_MOUSE
Frmd8	FERM domain containing 8
Fsd2	Fibronectin type III and SPRY domain containing 2
Fuom	Fucose mutarotase
Galnt1	Polypeptide N-acetylgalactosaminyltransferase 1
Galnt13	Polypeptide N-acetylgalactosaminyltransferase 13
Gas6	Growth arrest specific 6
Gbp2	Guanylate binding protein 2
Gbp4	Guanylate binding protein 4
Gbp5	Guanylate binding protein 5
Gcgr	Glucagon receptor
Gfod1	PREDICTED: glucose-fructose oxidoreductase domain containing 1
Ghr	Growth hormone receptor
Gipc2	GIPC PDZ domain containing family, member 2
Gli2	GLI family zinc finger 2
Glis1	PREDICTED: GLIS family zinc finger 1
Glrx5	Glutaredoxin 5
Gmpr2	Guanosine monophosphate reductase 2
Gng11	Guanine nucleotide binding protein
Gpd2	Glycerol-3-phosphate dehydrogenase 2
Gpr37l1	G protein-coupled receptor 37-like 1
Gpsm1	G-protein signaling modulator 1
Gramd4	GRAM domain containing 4
Grip2	Glutamate receptor interacting protein 2
Gstt3	Glutathione S-transferase, theta 3
Gzmb	Granzyme B
Gzmc	Granzyme C
Hccs	Holocytochrome c synthase
Hexb	Hexosaminidase subunit beta
Higd1a	HIG1 hypoxia inducible domain family, member 1A
Hk2	Hexokinase 2
Hmgb3	High mobility group box 3
Hmgcs1	3-hydroxy-3-methylglutaryl-CoA synthase 1
Hnrnpc	Heterogeneous nuclear ribonucleoprotein C
Homer1	Homer scaffolding protein 1
Hpdl	4-hydroxyphenylpyruvate dioxygenase-like
Hps1	HPS1, biogenesis of lysosomal organelles complex 3 subunit 1
Hras	HRas proto-oncogene, GTPase
Hrasls	HRAS-like suppressor
Hrc	Histidine rich calcium binding protein
Hspa12a	Heat shock protein family A
Hspb3	Heat shock protein family B (small) member 3
Hspd1	Heat shock protein family D member 1
Hspe1	Heat shock protein family E member 1
Icoslg	PREDICTED: inducible T-cell co-stimulator ligand
Id2	Inhibitor of DNA binding 2
Ido1	Indoleamine 2,3-dioxygenase 1
Ido2	PREDICTED: indoleamine 2,3-dioxygenase 2
Ifi47	Interferon gamma inducible protein 47
Igf1	Insulin-like growth factor 1
Igfbp3	Insulin-like growth factor binding protein 3
Igfbp6	Insulin-like growth factor binding protein 6
Igtp	Interferon gamma induced GTPase
Il15	PREDICTED: interleukin 15
Il17d	Interleukin 17D
Il2rg	Interleukin 2 receptor subunit gamma
Il34	Interleukin 34
Impad1	Inositol monophosphatase domain containing 1
Inppl1	Inositol polyphosphate phosphatase-like 1
Iqsec3	IQ motif and Sec7 domain 3
Irf1	Interferon regulatory factor 1
Irgm	Immunity-related GTPase M
Irgm2	PREDICTED: immunity-related GTPase family M member 2
Islr	Immunoglobulin superfamily containing leucine-rich repeat
Itga6	Integrin subunit alpha 6
Itgae	Integrin subunit alpha E
Itm2a	Integral membrane protein 2A
Itsn2	Intersectin 2
Jph2	PREDICTED: junctophilin 2
Kank2	KN motif and ankyrin repeat domains 2
Kank4	KN motif and ankyrin repeat domains 4
Kazald1	Kazal-type serine peptidase inhibitor domain 1
Kbtbd3	PREDICTED: kelch repeat and BTB domain containing 3
Kbtbd7	Kelch repeat and BTB domain containing 7
Kcna2	Potassium voltage-gated channel subfamily A member 2
Kcnb1	Potassium voltage-gated channel subfamily B member 1
Kcnd2	Potassium voltage-gated channel subfamily D member 2
Kcnd3	Potassium voltage-gated channel subfamily D member 3
Kcnj11	Potassium voltage-gated channel subfamily J member 11
Kcnk2	Potassium two pore domain channel subfamily K member 2
Kcnn1	PREDICTED: potassium calcium-activated channel subfamily N member 1
Kctd3	Potassium channel tetramerization domain containing 3
Kdm8	Lysine demethylase 8
Klc2	Kinesin light chain 2
Klf10	Kruppel-like factor 10
Klhl23	Kelch-like family member 23
Klhl31	Kelch-like family member 31
Klhl9	Kelch-like family member 9
Klri1	Killer cell lectin-like receptor family I member 1
Krt10	Keratin 10
L1cam	L1 cell adhesion molecule
Lama4	Laminin subunit alpha 4
Lamc3	Laminin subunit gamma 3
Lap3	Leucine aminopeptidase 3
Larp4b	La ribonucleoprotein domain family, member 4B
Lbh	PREDICTED: limb bud and heart development
Lenep	Lens epithelial protein
Limd1	LIM domains containing 1
Lims2	LIM zinc finger domain containing 2
Lmod3	Leiomodin 3
LOC100302372	Hypothetical protein LOC100302372
LOC100362819	PREDICTED: autism susceptibility candidate 2-like
LOC100365212	PREDICTED: hypothetical protein LOC100365212
LOC100909396	PREDICTED: uncharacterized LOC100909396
LOC100909803	PREDICTED: uncharacterized LOC100909803
LOC100909904	PREDICTED: uncharacterized LOC100909904
LOC100910558	Uncharacterized LOC100910558
LOC100910604	PREDICTED: uncharacterized LOC100910604
LOC100910676	PREDICTED: uncharacterized LOC100910676
LOC100910710	PREDICTED: NADH dehydrogenase
LOC100910809	PREDICTED: uncharacterized LOC100910809
LOC100910949	PREDICTED: uncharacterized LOC100910949
LOC100910973	Uncharacterized LOC100910973
LOC100911030	PREDICTED: uncharacterized LOC100911030
LOC100911163	PREDICTED: granzyme C-like
LOC100911384	PREDICTED: uncharacterized LOC100911384
LOC100911946	PREDICTED: uncharacterized LOC100911946
LOC100912248	PREDICTED: uncharacterized LOC100912248
LOC100912416	PREDICTED: protein FAM115C-like
LOC100912557	Q86W00_HUMAN
LOC102546843	PREDICTED: uncharacterized LOC102546843
LOC102547411	PREDICTED: uncharacterized LOC102547411
LOC102547591	PREDICTED: uncharacterized LOC102547591
LOC102548417	PREDICTED: uncharacterized LOC102548417
LOC102548546	PREDICTED: zinc finger protein 709-like
LOC102548611	PREDICTED: uncharacterized LOC102548611
LOC102548615	PREDICTED: uncharacterized LOC102548615
LOC102549572	PREDICTED: uncharacterized LOC102549572
LOC102550095	PREDICTED: uncharacterized LOC102550095
LOC102550392	PREDICTED: uncharacterized LOC102550392
LOC102550510	PREDICTED: uncharacterized LOC102550510
LOC102550895	PREDICTED: uncharacterized LOC102550895
LOC102550976	PREDICTED: uncharacterized LOC102550976
LOC102551408	PREDICTED: very-long-chain
LOC102553150	PREDICTED: protein NLRC5-like
LOC102553847	PREDICTED: uncharacterized LOC102553847
LOC102553868	PREDICTED: uncharacterized LOC102553868
LOC102554096	PREDICTED: guanylate-binding protein 6-like
LOC102554222	PREDICTED: uncharacterized LOC102554222
LOC102554789	PREDICTED: uncharacterized LOC102554789
LOC102555433	PREDICTED: uncharacterized LOC102555433
LOC102555634	PREDICTED: interferon-inducible GTPase 1-like
LOC102556053	PREDICTED: uncharacterized LOC102556053
LOC102556513	PREDICTED: uncharacterized LOC102556513
LOC102557019	PREDICTED: uncharacterized LOC102557019
LOC103691162	PREDICTED: uncharacterized LOC103691162
LOC103691274	PREDICTED: uncharacterized LOC103691274
LOC103691752	PREDICTED: uncharacterized LOC103691752
LOC103691877	PREDICTED: uncharacterized LOC103691877
LOC103691886	PREDICTED: uncharacterized LOC103691886
LOC103692639	PREDICTED: uncharacterized LOC103692639
LOC103693340	Uncharacterized LOC103693340
LOC103693780	PREDICTED: 2-oxoglutarate dehydrogenase, mitochondrial-like
LOC103694306	PREDICTED: uncharacterized LOC103694306
LOC103695196	PREDICTED: uncharacterized LOC103695196
LOC106631776	Uncharacterized LOC106631776
LOC108348175	PREDICTED: protein quaking-like
LOC108349407	PREDICTED: endogenous retrovirus group K member 19 Env polyprotein-like
LOC108352127	PREDICTED: uncharacterized LOC108352127
LOC367117	Similar to RIKEN cDNA 2900055D03
LOC498368	Similar to RIKEN cDNA 0610040J01
LOC499235	LRRGT00141
LOC500013	PREDICTED: similar to sterile alpha motif domain containing 9-like
LOC501038	Q7TQ12_RAT
LOC680039	Hypothetical protein LOC680039
LOC680077	PREDICTED: dynactin-associated protein-like
LOC683897	Similar to Protein C6orf203
LOC684193	PREDICTED: similar to sterile alpha motif domain containing 9-like
LOC684871	Similar to Protein C8orf4 (Thyroid cancer protein 1)
LOC685067	PREDICTED: similar to guanylate binding protein family, member 6
LOC691000	Hypothetical protein LOC691000
LOC691485	PREDICTED: hypothetical protein LOC691485
Lpgat1	PREDICTED: lysophosphatidylglycerol acyltransferase 1
Lpp	PREDICTED: LIM domain containing preferred translocation partner in lipoma
Lrrc39	Leucine rich repeat containing 39
Ltb	Lymphotoxin beta
Ly6al	Lymphocyte antigen 6 complex, locus A-like
Lyrm7	LYR motif containing 7
Magohb	Mago homolog B, exon junction complex core component
Man1c1	Mannosidase, alpha, class 1C, member 1
Mapk8ip1	Mitogen-activated protein kinase 8 interacting protein 1
Mapt	Microtubule-associated protein tau
Marcksl1	MARCKS-like 1
Mbnl1	Muscleblind-like splicing regulator 1
Mcm10	Minichromosome maintenance 10 replication initiation factor
Mcm5	Minichromosome maintenance complex component 5
Mcpt10	Mast cell protease 10
Mcpt1l1	Mast cell protease 1-like 1
Mcpt9	Mast cell protease 9
Mcrip2	MAPK regulated co-repressor interacting protein 2
Metrnl	Meteorin-like, glial cell differentiation regulator
Mettl17	Methyltransferase like 17
Mfn1	Mitofusin 1
Mfsd12	PREDICTED: major facilitator superfamily domain containing 12
MGC105567	Similar to cDNA sequence BC023105
MGC105649	Hypothetical LOC302884
MGC108823	Similar to interferon-inducible GTPase
Miga2	Mitoguardin 2
Minos1	Mitochondrial inner membrane organizing system 1
Misp3	MISP family member 3
Mkks	McKusick-Kaufman syndrome
Mob3c	MOB kinase activator 3C
Mov10	Mov10 RISC complex RNA helicase
Mpdz	Multiple PDZ domain crumbs cell polarity complex component
Mpv17	MpV17 mitochondrial inner membrane protein
Mrm1	Mitochondrial rRNA methyltransferase 1
Mrpl12	Mitochondrial ribosomal protein L12
Mrpl13	Mitochondrial ribosomal protein L13
Mrpl22	Mitochondrial ribosomal protein L22
mrpl24	Mitochondrial ribosomal protein L24
Mrpl34	Mitochondrial ribosomal protein L34
Mrpl37	Mitochondrial ribosomal protein L37
Mrpl45	Mitochondrial ribosomal protein L45
Mrpl47	Mitochondrial ribosomal protein L47
Mrps34	Mitochondrial ribosomal protein S34
Msmo1	Methylsterol monooxygenase 1
Mst1	Macrophage stimulating 1
Mtap	Methylthioadenosine phosphorylase
Mtcl1	Microtubule crosslinking factor 1
Mtfp1	Mitochondrial fission process 1
Mtx1	Metaxin 1
Muc19	Mucin 19, oligomeric
Myo19	PREDICTED: myosin XIX
Myo1g	Myosin IG
Myocd	Myocardin
Myoz1	Myozenin 1
Naa40	N (alpha)-acetyltransferase 40, NatD catalytic subunit
Narfl	Nuclear prelamin A recognition factor-like
Nav3	Neuron navigator 3
Nceh1	Neutral cholesterol ester hydrolase 1
Ncf1	Neutrophil cytosolic factor 1
Ncoa7	PREDICTED: nuclear receptor coactivator 7
Ndrg3	NDRG family member 3
Ndufaf2	NADH:ubiquinone oxidoreductase complex assembly factor 2
Ndufaf4	NADH:ubiquinone oxidoreductase complex assembly factor 4
Ndufaf5	NADH:ubiquinone oxidoreductase complex assembly factor 5
Ndufb10	NADH:ubiquinone oxidoreductase subunit B10
Ndufb2	NADH:ubiquinone oxidoreductase subunit B2
Ndufb7	NADH:ubiquinone oxidoreductase subunit B7
Ndufc1	PREDICTED: NADH:ubiquinone oxidoreductase subunit C1
Ndufs5	NADH:ubiquinone oxidoreductase subunit S5
Neurl3	Neuralized E3 ubiquitin protein ligase 3
NEWGENE_1591402	PREDICTED: pleckstrin homology like domain family B member 2
Nid1	Nidogen 1
Nipsnap1	Nipsnap homolog 1
Nkain1	PREDICTED: Na+/K+ transporting ATPase interacting 1
Nlrc5	PREDICTED: NLR family, CARD domain containing 5
Nlrp1a	NLR family, pyrin domain containing 1A
Nmi	N-myc
Nmnat1	Nicotinamide nucleotide adenylyltransferase 1
Nmnat3	Nicotinamide nucleotide adenylyltransferase 3
Nmrk2	Nicotinamide riboside kinase 2
Nol11	PREDICTED: nucleolar protein 11
Npepo	Aminopeptidase O
Nr0b2	Nuclear receptor subfamily 0, group B, member 2
Nr2f1	Nuclear receptor subfamily 2, group F, member 1
Nr2f6	Nuclear receptor subfamily 2, group F, member 6
Nrarp	Notch-regulated ankyrin repeat protein
Nrep	PREDICTED: neuronal regeneration related protein
Ntsr2	Neurotensin receptor 2
Nuak2	NUAK family kinase 2
Nudt8	Nudix hydrolase 8
Nxph3	Neurexophilin 3
Oaf	Out at first homolog
Olr386	Olfactory receptor 386
Opa3	Q3WHU3_9ACTO (Q3WHU3) Transposase IS116/IS110/IS902, partial
Osbpl6	PREDICTED: oxysterol binding protein-like 6
P2ry1	Purinergic receptor P2Y1
Pacsin2	Protein kinase C and casein kinase substrate in neurons 2
Pank4	Pantothenate kinase 4
Paqr4	Progestin and adipoQ receptor family member 4
Paqr6	Progestin and adipoQ receptor family member 6
Park7	Parkinsonism associated deglycase
Parp14	Poly (ADP-ribose) polymerase family, member 14
Pars2	Prolyl-tRNA synthetase 2, mitochondrial
Pcdh7	PREDICTED: protocadherin 7
PCOLCE2	Procollagen C-endopeptidase enhancer 2
Pcp4l1	Purkinje cell protein 4-like 1
Pde1b	PREDICTED: phosphodiesterase 1B
Pdp2	Pyruvate dehydrogenase phosphatase isoenzyme 2
Pdzk1	PDZ domain containing 1
Pdzrn3	PDZ domain containing RING finger 3
Pecr	Peroxisomal trans-2-enoyl-CoA reductase
Perm1	PPARGC1 and ESRR induced regulator, muscle 1
Pex19	Peroxisomal biogenesis factor 19
Pgam2	Phosphoglycerate mutase 2
Pgk1	Phosphoglycerate kinase 1
Phactr1	Phosphatase and actin regulator 1
Phldb1	Pleckstrin homology-like domain, family B, member 1
Pitpnm2	Phosphatidylinositol transfer protein, membrane-associated 2
Pkia	CAMP-dependent protein kinase inhibitor alpha
Pla2g16	Phospholipase A2, group XVI
Plcb1	PLCB1_RAT (P10687) 1-phosphatidylinositol-4,5-bisphosphate phosphodiesterase beta 1
Plekha2	Pleckstrin homology domain containing A2
Plekhb1	Pleckstrin homology domain containing B1
Pllp	Plasmolipin
Plp1	Proteolipid protein 1
Plpp7	Phospholipid phosphatase 7
Plxnd1	Plexin D1
Pnkd	Paroxysmal nonkinesigenic dyskinesia
Polrmt	RNA polymerase mitochondrial
Popdc2	Popeye domain containing 2
Popdc3	Popeye domain containing 3
Ppara	PREDICTED: peroxisome proliferator activated receptor alpha
Ppargc1a	PPARG coactivator 1 alpha
Ppargc1b	PPARG coactivator 1 beta
Ppm1l	Protein phosphatase, Mg2+/Mn2+ dependent, 1L
Pptc7	PTC7 protein phosphatase homolog
Prkab1	Protein kinase AMP-activated non-catalytic subunit beta 1
Prkaca	Protein kinase cAMP-activated catalytic subunit alpha
Prkd2	Protein kinase D2
Psmb10	Proteasome subunit beta 10
Psmb9	Proteasome subunit beta 9
Psme2	Proteasome activator subunit 2
Pstk	PSTK_MOUSE (Q8BP74) L-seryl-tRNA (Ser/Sec) kinase
Ptpn21	Protein tyrosine phosphatase, non-receptor type 21
Ptpn4	Protein tyrosine phosphatase, non-receptor type 4
Qk	Quaking
Rab1b	RAB1B, member RAS oncogene family
Rab32	RAB32, member RAS oncogene family
Ramp1	Receptor activity modifying protein 1
Rasd2	RASD family, member 2
Rasgrp3	RAS guanyl releasing protein 3
Rassf3	Ras association domain family member 3
Rbfox1	RNA binding protein, fox-1 homolog 1
Rbm38	RNA binding motif protein 38
Rbms1	RNA binding motif, single stranded interacting protein 1
Rbpms	PREDICTED: RNA binding protein with multiple splicing
Rdh13	Retinol dehydrogenase 13
Reep1	Receptor accessory protein 1
Rftn2	PREDICTED: raftlin family member 2
RGD1306739	PREDICTED: similar to RIKEN cDNA 1700040L02
RGD1306750	LOC362451
RGD1309036	Hypothetical LOC292874
RGD1309362	Similar to interferon-inducible GTPase
RGD1311188	Similar to 1500031N24Rik protein
RGD1563072	Similar to hypothetical protein FLJ38984
RGD1563091	Similar to OEF2
RGD1565784	RGD1565784
Rgs4	Regulator of G-protein signaling 4
Rgs5	Regulator of G-protein signaling 5
Rin3	Ras and Rab interactor 3
Ripk2	Receptor-interacting serine-threonine kinase 2
Rnf114	Ring finger protein 114
Rnf115	Ring finger protein 115
Rnf128	Ring finger protein 128, E3 ubiquitin protein ligase
rnf141	PREDICTED: ring finger protein 141
Rnf144a	Ring finger protein 144A
Rnf207	Ring finger protein 207
Rnpep	Arginyl aminopeptidase
Ros1	ROS proto-oncogene 1, receptor tyrosine kinase
Rragd	Ras-related GTP binding D
Rsad2	Radical S-adenosyl methionine domain containing 2
RT1-CE13	RT1 class I, locus CE13
RT1-CE15	RT1 class I, locus CE15
RT1-CE16	RT1 class I, locus CE16
RT1-CE4	RT1 class I, locus CE4
RT1-CE6	RT1 class I, locus CE6
RT1-CE7	RT1 class I, locus CE7
RT1-Da	RT1 class II, locus Da
RT1-Db1	RT1 class II, locus Db1
RT1-Db2	RT1 class II, locus Db2
RT1-EC2	RT1 class Ib, locus EC2
RT1-M3-1	RT1 class Ib, locus M3, gene 1
RT1-M6-2	RT1 class I, locus M6, gene 2
RT1-S2	RT1 class Ib, locus S2
RT1-S3	RT1 class Ib, locus S3
RT1-T24-4	RT1 class I, locus T24, gene 4
Rxrg	Retinoid X receptor gamma
Ryk	PREDICTED: receptor-like tyrosine kinase
Samhd1	SAM and HD domain containing deoxynucleoside triphosphate triphosphohydrolase 1
Sapcd1	PREDICTED: suppressor APC domain containing 1
Sapcd2	Suppressor APC domain containing 2
Scn2b	PREDICTED: sodium voltage-gated channel beta subunit 2
Scpep1	Serine carboxypeptidase 1
Scx	Scleraxis bHLH transcription factor
Sdhaf3	FM113376 etnohea cDNA clone etnoheaP0025C07 5' sequence
Sema3b	Semaphorin 3B
Sema3c	Semaphorin 3C
Sema7a	Semaphorin 7A
Sept4	Septin 4
Sfxn5	Sideroflexin 5
Sgk3	Serum/glucocorticoid regulated kinase family, member 3
Sh2d4a	SH2 domain containing 4A
Sh3bp5	SH3-domain binding protein 5
Sh3glb1	PREDICTED: SH3 domain -containing GRB2-like endophilin B1
Sh3rf3	PREDICTED: SH3 domain containing ring finger 3
Slain2	SLAIN motif family, member 2
Slc12a7	Solute carrier family 12 member 7
Slc13a2	Solute carrier family 13 member 2
Slc16a13	Solute carrier family 16, member 13
Slc16a9	PREDICTED: solute carrier family 16, member 9
Slc22a5	Up-regulator of carnitine transporter, OCTN2
Slc25a13	PREDICTED: solute carrier family 25 member 13
Slc25a15	Solute carrier family 25 member 15
Slc25a19	Solute carrier family 25 member 19
Slc25a26	Solute carrier family 25 member 26
Slc25a34	Solute carrier family 25, member 34
Slc25a42	Solute carrier family 25, member 42
Slc25a45	Solute carrier family 25, member 45
Slc2a9	Solute carrier family 2 member 9
Slc35a4	Solute carrier family 35, member A4
Slc37a4	Solute carrier family 37 member 4
Slc38a3	Solute carrier family 38, member 3
Slc38a5	Solute carrier family 38, member 5
Slc4a1	Solute carrier family 4 member 1
Slco2b1	Solute carrier organic anion transporter family, member 2b1
Slco5a1	PREDICTED: solute carrier organic anion transporter family, member 5A1
Slitrk6	SLIT and NTRK-like family, member 6
Smap2	Small ArfGAP2
Smco4	Single-pass membrane protein with coiled-coil domains 4
Smim5	Small integral membrane protein 5
Smpd3	Sphingomyelin phosphodiesterase 3
Smtn	Smoothelin
Smyd1	PREDICTED: SET and MYND domain containing 1
Snrnp27	Small nuclear ribonucleoprotein 27 (U4/U6.U5)
Sntb1	PREDICTED: syntrophin, beta 1
Snx19	Sorting nexin 19
Sod3	Superoxide dismutase 3
Spef1	Sperm flagellar 1
Spsb3	SplA/ryanodine receptor domain and SOCS box containing 3
Sptbn1	PREDICTED: spectrin, beta, non-erythrocytic 1
Srl	Sarcalumenin
Srsf3	Serine and arginine rich splicing factor 3
Ssc4d	PREDICTED: scavenger receptor cysteine rich family member with 4 domains
St3gal5	ST3 beta-galactoside alpha-2,3-sialyltransferase 5
Stard8	StAR-related lipid transfer domain containing 8
Stat1	Signal transducer and activator of transcription 1
Stc1	Stanniocalcin 1
Syne1	PREDICTED: spectrin repeat containing nuclear envelope protein 1
Syngr1	PREDICTED: synaptogyrin 1
Synj2	Synaptojanin 2
Synpo2l	Synaptopodin 2-like
Taco1	Translational activator of cytochrome c oxidase I
Tap1	Transporter 1, ATP binding cassette subfamily B member
Tapbp	TAP binding protein
TC575093	Q5U2Z7_RAT (Q5U2Z7) Rho GTPase activating protein 24
TC592104	Unknown
TC593027	Unknown
TC595871	Unknown
TC597727	Unknown
TC600135	Unknown
TC602923	Unknown
Terc	Telomerase RNA component
Tex9	Testis expressed 9
Tgfbi	Transforming growth factor, beta induced
Tgif2	TGFB-induced factor homeobox 2
Thbs2	Thrombospondin 2
Tigar	TP53 induced glycolysis regulatory phosphatase
Timeless	Timeless circadian clock
Timm10	Translocase of inner mitochondrial membrane 10
Timm21	Translocase of inner mitochondrial membrane 21
Timm8a1	Translocase of inner mitochondrial membrane 8 homolog A1
Timm8b	Translocase of inner mitochondrial membrane 8 homolog B
Tlr13	Toll-like receptor 13
Tmcc2	Transmembrane and coiled-coil domain family 2
Tmco2	PREDICTED: transmembrane and coiled-coil domains 2
Tmem106a	Transmembrane protein 106A
Tmem14a	Transmembrane protein 14A
Tmem150c	Transmembrane protein 150C
Tmem171	Transmembrane protein 171
Tmem184b	Transmembrane protein 184B
Tmem64	PREDICTED: transmembrane protein 64
Tmem65	Transmembrane protein 65
Tmem74b	Transmembrane protein 74B
Tmem86a	Transmembrane protein 86A
Tnfaip8	TNF alpha induced protein 8
Tnfsf10	Tumor necrosis factor superfamily member 10
Tomm22	Translocase of outer mitochondrial membrane 22
Tomm40l	PREDICTED: translocase of outer mitochondrial membrane 40 like
Tomm5	Translocase of outer mitochondrial membrane 5
Traf1	TNF receptor-associated factor 1
Traf6	TNF receptor associated factor 6
Trak1	Trafficking kinesin protein 1
Trak2	Trafficking kinesin protein 2
Trim35	Tripartite motif-containing 35
Trim45	Tripartite motif-containing 45
Trim47	Tripartite motif-containing 47
Trim7	PREDICTED: tripartite motif-containing 7
Trnp1	PREDICTED: TMF1-regulated nuclear protein 1
Trpc1	Transient receptor potential cation channel, subfamily C, member 1
Ttc7a	Tetratricopeptide repeat domain 7A
Tuba1b	Tubulin, alpha 1B
Tuba4a	Tubulin, alpha 4A
Tuba8	Tubulin, alpha 8
Tubg1	Tubulin, gamma 1
Tymp	Thymidine phosphorylase
Uap1l1	UDP-N-acetylglucosamine pyrophosphorylase 1 like 1
Uba7	Ubiquitin-like modifier activating enzyme 7
Ubd	Ubiquitin D
Ube2ql1	Ubiquitin-conjugating enzyme E2Q family-like 1
Ubl4a	Ubiquitin-like 4A
Ucp3	Uncoupling protein 3
Unc119	Unc-119 lipid binding chaperone
Uqcc1	Ubiquinol-cytochrome c reductase complex assembly factor 1
Uqcrb	Ubiquinol-cytochrome c reductase binding protein
Vcam1	Vascular cell adhesion molecule 1
Vdac1	Voltage-dependent anion channel 1
Vipas39	VPS33B interacting protein, apical-basolateral polarity regulator, spe-39 homolog
Vom2r35	Vomeronasal 2 receptor, 35
Vtn	Vitronectin
Vwa7	Von Willebrand factor A domain containing 7
Wars	Tryptophanyl-tRNA synthetase
Wdr13	PREDICTED: WD repeat domain 13
Wipf3	WAS/WASL interacting protein family, member 3
Wnt11	Wingless-type MMTV integration site family, member 11
Wrnip1	Werner helicase interacting protein 1
Xcl1	X-C motif chemokine ligand 1
XM_001061848	PREDICTED: hypothetical protein LOC684998
XR_146199	PREDICTED: uncharacterized LOC100911836
XR_146307	PREDICTED: uncharacterized LOC100912219
Yif1a	Yip1 interacting factor homolog A, membrane trafficking protein
Zbtb18	PREDICTED: zinc finger protein 238
Zbtb46	PREDICTED: zinc finger and BTB domain containing 46
Zdhhc1	Zinc finger, DHHC-type containing 1
Zfp14	ZFP14 zinc finger protein
Zfp184	PREDICTED: zinc finger protein 184
Zfp606	Zinc finger protein 606
Zfp618	Zinc finger protein 618
Zfp629	Zinc finger protein 629
Zfp706	Zinc finger protein 706
Zfp770	PREDICTED: zinc finger protein 770
Zfp91	Zinc finger protein 91
Zfp955a	Zinc finger protein 955A
Zgpat	Zinc finger CCCH-type and G-patch domain containing
Zmiz2	Zinc finger, MIZ-type containing 2
Znf48	PREDICTED: zinc finger protein 48
Zranb3	Zinc finger RANBP2-type containing 3

## Sheet: Male Up in landiolol
List of the 603 genes in male significantly up-regulated in CLP+Lnd vs CLP (SAM 2, FDR<0,05). The common genes between male and female are found in blue.
Gene	Description
AA849651	EST192418 Normalized rat muscle, Bento Soares Rattus sp. cDNA clone RMUAH31 3' end sequence
AA899342	UI-R-E0-cl-e-06-0-UI.s2 UI-R-E0 cDNA clone UI-R-E0-cl-e-06-0-UI 3' sequence
Abca2	ATP-binding cassette, subfamily A
Abca8a	ATP-binding cassette, subfamily A
Abca9	PREDICTED: ATP-binding cassette, subfamily A
Abcg3l1	ATP-binding cassette, subfamily G (WHITE), member 3-like 1
Abhd16a	Abhydrolase domain containing 16A
Abhd8	Abhydrolase domain containing 8
Abi1	Abl-interactor 1
Ablim3	Actin binding LIM protein family, member 3
Acot4	Acyl-CoA thioesterase 4
Acot8	Acyl-CoA thioesterase 8
Acp2	Acid phosphatase 2, lysosomal
Acsl1	Acyl-CoA synthetase long-chain family member 1
Acss1	Acyl-CoA synthetase short-chain family member 1
Actr3b	ARP3 actin-related protein 3 homolog B
Adck2	AarF domain containing kinase 2
Adcyap1r1	Adenylate cyclase activating polypeptide 1 receptor type 1
Adra1a	Adrenoceptor alpha 1A
Afap1l2	Actin filament associated protein 1-like 2
Agap2	ArfGAP with GTPase domain, ankyrin repeat and PH domain 2
Agap3	ArfGAP with GTPase domain, ankyrin repeat and PH domain 3
Ago4	PREDICTED: argonaute RISC catalytic component 4
Agpat3	1-acylglycerol-3-phosphate O-acyltransferase 3
Ahnak	AHNAK nucleoprotein
AI045106	cDNA clone UI-R-C1-kg-b-02-0-UI 3' sequence
AI511420	cDNA clone UI-R-C3-sh-b-09-0-UI 3' sequence
Aif1	Allograft inflammatory factor 1
Aim1	PREDICTED: absent in melanoma 1
Akap1	PREDICTED: A kinase (PRKA) anchor protein 1
Akap6	A kinase anchor protein 6
Akr1c19	Aldo-keto reductase family 1, member C19
Aldh1a1	Aldehyde dehydrogenase 1 family, member A1
Aldh3a1	Aldehyde dehydrogenase 3 family, member A1
Aldob	Aldolase B, fructose-bisphosphate
Alox5	Arachidonate 5-lipoxygenase
Amt	Aminomethyltransferase
Ankrd27	Ankyrin repeat domain 27
Ano10	PREDICTED: anoctamin 10
Anxa10	Annexin A10
Aoc3	Amine oxidase, copper containing 3
Aox3	Aldehyde oxidase 3
Ar	Androgen receptor
Arfrp1	PREDICTED: ADP-ribosylation factor related protein 1
Arhgap28	PREDICTED: Rho GTPase activating protein 28
Arhgap4	Rho GTPase activating protein 4
Arhgdib	Rho, GDP dissociation inhibitor
Asb15	PREDICTED: ankyrin repeat and SOCS box containing 15
Asb18	Ankyrin repeat and SOCS box-containing 18
Ascl2	Achaete-scute family bHLH transcription factor 2
Atp6v1h	PREDICTED: ATPase, H+ transporting, lysosomal V1 subunit H
B3gntl1	PREDICTED: UDP-GlcNAc:betaGal beta-1,3-N-acetylglucosaminyltransferase-like 1
Batf3	Basic leucine zipper transcription factor, ATF-like 3
Bcl2	B-cell CLL/lymphoma 2
BE115273	cDNA clone UI-R-CA0-axr-d-02-0-UI 3' sequence
BF550923	cDNA clone UI-R-C1-kb-b-07-0-UI 5' sequence
BF556567	cDNA clone UI-R-E1-fu-g-10-0-UI 5' sequence
BI295828	cDNA clone UI-R-DK0-cfb-b-05-0-UI 3' sequence
BP503889	cDNA clone RI05403 5' sequence
Btk	TL0ACA47YE13 mRNA sequence.
C3ar1	PREDICTED: complement component 3a receptor 1
Cald1	PREDICTED: caldesmon 1
Camk2n1	Calcium/calmodulin-dependent protein kinase II inhibitor 1
Capn13	Calpain 13
Capn2	Calpain 2
Car11	Carbonic anhydrase 11
Card6	PREDICTED: caspase recruitment domain family, member 6
CB605830	AMGNNUC:NRDG1-00077-B5-A nrdg1
Ccdc68	Coiled-coil domain containing 68
Ccdc69	Coiled-coil domain containing 69
Cck	Cholecystokinin
Ccr9	Chemokine
Cd244	Cd244 molecule, natural killer cell receptor 2B4
Cd247	Cd247 molecule
Cd36	CD36 molecule (thrombospondin receptor)
Cd3g	CD3 molecule, gamma
Cd96	CD96 molecule
Cdc34	Cell division cycle 34
Cdc42bpg	CDC42 binding protein kinase gamma
Celf2	MRNA for ETR-R3a protein, alternatively spliced isoform.
Cep131	Centrosomal protein 131
Cep85	Centrosomal protein 85kDa
Cers2	Ceramide synthase 2
CF109359	SHultzomica02610 Rat lung airway and parenchyma cDNA libraries cDNA clone Contig2265 5' sequence
Chaf1b	Chromatin assembly factor 1, subunit B
Chmp1a	Charged multivesicular body protein 1A
Chmp2b	PREDICTED: charged multivesicular body protein 2B
Chst15	PREDICTED: carbohydrate (N-acetylgalactosamine 4-sulfate 6-O) sulfotransferase 15
Chtop	Similar to DKFZP547E1010 protein
Ckap4	Cytoskeleton-associated protein 4
Clta	Clathrin, light chain A
Cluh	Clustered mitochondria
Cmpk2	Cytidine monophosphate kinase 2
Cnnm3	Cyclin and CBS domain divalent metal cation transport mediator 3
CO398263	cDNA clone IMAGE:7319437 5' sequence
Col4a3	Collagen, type IV, alpha 3
Col6a3	PREDICTED: collagen, type VI, alpha 3
Colq	Collagen-like tail subunit
Coro1a	Coronin, actin binding protein 1A
Coro6	Coronin 6
Cotl1	Coactosin-like F-actin binding protein 1
Cped1	PREDICTED: cadherin-like and PC-esterase domain containing 1
Cplx2	Complexin 2
Crim1	Cysteine rich transmembrane BMP regulator 1
Ctgf	Connective tissue growth factor
CV109460	cDNA clone IMAGE:7459544 5' sequence
Cxcl13	Chemokine (C-X-C motif) ligand 13
Cxcl9	Chemokine (C-X-C motif) ligand 9
Cyba	Cytochrome b-245, alpha polypeptide
Cybrd1	Cytochrome b reductase 1
Cyp27a1	Cytochrome P450, family 27, subfamily a, polypeptide 1
Cyp2e1	Cytochrome P450, family 2, subfamily e, polypeptide 1
Cyth3	Cytohesin 3
Cyth4	Cytohesin 4
Cytip	Cytohesin 1 interacting protein
Cyyr1	Cysteine/tyrosine-rich 1
Dact3	Dapper, antagonist of beta-catenin, homolog 3
Dclk3	Doublecortin-like kinase 3
Ddah2	Dimethylarginine dimethylaminohydrolase 2
Ddhd2	PREDICTED: DDHD domain containing 2
Dgat1	Diacylglycerol O-acyltransferase 1
Dhrs7c	Dehydrogenase/reductase (SDR family) member 7C
Dhx35	DEAH (Asp-Glu-Ala-His) box polypeptide 35
Dlg2	PREDICTED: discs, large homolog 2
Dll4	Delta-like 4
Dnah11	PREDICTED: dynein, axonemal, heavy chain 11
Dock10	PREDICTED: dedicator of cytokinesis 10
Dock2	PREDICTED: dedicator of cytokinesis 2
Dok3	Docking protein 3
Dok7	PREDICTED: docking protein 7
Dpt	Dermatopontin
Drap1	Dr1 associated protein 1
Dscc1	DNA replication and sister chromatid cohesion 1
Dscr3	Down syndrome critical region 3
Dtnb	Dystrobrevin, beta
Dusp26	Dual specificity phosphatase 26
DV723748	RVL15663 Wackym-Soares normalized rat vestibular cDNA library cDNA 5' sequence
Dvl3	PREDICTED: dishevelled segment polarity protein 3
Eepd1	Endonuclease/exonuclease/phosphatase family domain containing 1
Efcc1	PREDICTED: EF-hand and coiled-coil domain containing 1
Eif2ak3	Eukaryotic translation initiation factor 2 alpha kinase 3
Elmo2	Engulfment and cell motility 2
Enpp1	PREDICTED: ectonucleotide pyrophosphatase/phosphodiesterase 1
ENSRNOT00000000246	PREDICTED: lipase maturation factor 1
ENSRNOT00000002664	GB
ENSRNOT00000003182	Aldehyde dehydrogenase 3 family, member A1
ENSRNOT00000004602	PREDICTED: adenosine A1 receptor
ENSRNOT00000004829	PREDICTED: Rho GTPase activating protein 44
ENSRNOT00000005015	PREDICTED: galactosylceramidase
ENSRNOT00000005064	PREDICTED: ring finger protein, transmembrane 1
ENSRNOT00000006266	PREDICTED: Cd244 molecule, natural killer cell receptor 2B4
ENSRNOT00000006963	PREDICTED: activin A receptor, type I
ENSRNOT00000007233	PREDICTED: dynein, axonemal, heavy chain 11
ENSRNOT00000008645	PREDICTED: loss of heterozygosity, 12, chromosomal region 1
ENSRNOT00000009491	TL0AAA46YH20 mRNA sequence.
ENSRNOT00000009998	PREDICTED: deoxyribose-phosphate aldolase
ENSRNOT00000012386	TL0AEA5YD06 mRNA sequence.
ENSRNOT00000013285	PREDICTED: ripply transcriptional repressor 2
ENSRNOT00000017834	PREDICTED: stearoyl-coenzyme A desaturase 4
ENSRNOT00000017998	Palmitoyl-protein thioesterase mRNA, complete cds.
ENSRNOT00000018425	TL0AEA59YC02 mRNA sequence.
ENSRNOT00000020770	PREDICTED: lon peptidase 2, peroxisomal
ENSRNOT00000020832	AMGNNUC:NRHY7-00013-D1-A nrhy7
ENSRNOT00000021189	RbSec1B mRNA, complete cds.
ENSRNOT00000021603	Unknown
ENSRNOT00000022574	PREDICTED: stathmin 1
ENSRNOT00000023101	PREDICTED: HAUS augmin-like complex, subunit 1
ENSRNOT00000023721	PREDICTED: similar to 1190005I06Rik protein
ENSRNOT00000024639	PREDICTED: zinc finger protein 768-like
ENSRNOT00000025705	Family with sequence similarity 89, member A
ENSRNOT00000025795	PREDICTED: spectrin repeat containing, nuclear envelope 1
ENSRNOT00000025983	PREDICTED: glycoprotein, alpha-galactosyltransferase 1,3
ENSRNOT00000034062	Unknown
ENSRNOT00000034097	PREDICTED: uncharacterized LOC100912785
ENSRNOT00000039341	Unknown
ENSRNOT00000039571	PREDICTED: absent in melanoma 1-like
ENSRNOT00000043269	PREDICTED: hypothetical protein LOC100360856
ENSRNOT00000047893	TL0AAA80YI02 mRNA sequence.
ENSRNOT00000048985	Tenascin XB
ENSRNOT00000050090	PREDICTED: transmembrane protein 258 B
ENSRNOT00000051326	MMAJ2969 S-periaxin {Mus musculus}
ENSRNOT00000055272	PREDICTED: phosphodiesterase 1B, calmodulin-dependent
ENSRNOT00000060494	PREDICTED: ankyrin repeat and SOCS box containing 15
ENSRNOT00000064032	Unknown
ENSRNOT00000064850	PREDICTED: palladin, cytoskeletal associated protein
ENSRNOT00000066348	PREDICTED: nicotinamide riboside kinase 2
ENSRNOT00000067522	PREDICTED: translocase of outer mitochondrial membrane 5 homolog
ENSRNOT00000072081	PREDICTED: similar to butyrophilin 3
ENSRNOT00000073094	Unknown
ENSRNOT00000073122	PREDICTED: nuclear receptor subfamily 2, group E, member 3
ENSRNOT00000073547	PREDICTED: interferon-induced protein 44-like
ENSRNOT00000073858	PREDICTED: forkhead box F1
ENSRNOT00000075014	PREDICTED: zinc finger protein 277
ENSRNOT00000075424	O88492_MOUSE
ENSRNOT00000075974	PREDICTED: uncharacterized LOC103692031
Epn3	Epsin 3
Epor	Erythropoietin receptor
Eps15l1	Epidermal growth factor receptor pathway substrate 15-like 1
Evc	Ellis van Creveld protein
Evi2a	Ecotropic viral integration site 2A
Extl1	Exostosin-like glycosyltransferase 1
Ezh1	Enhancer of zeste 1 polycomb repressive complex 2 subunit
Fam178b	Family with sequence similarity 178, member B
Fam195a	Family with sequence similarity 195, member A
Fam73b	Family with sequence similarity 73, member B
Fat4	FAT tumor suppressor homolog 4
Fez1	Fasciculation and elongation protein zeta 1
Flvcr2	Feline leukemia virus subgroup C cellular receptor family, member 2
FM080674	FM080674 etnoaor cDNA clone etnoaorP0039A24 5' sequence
Foxn2	PREDICTED: forkhead box N2
FQ100029	FQ100029 brain Sprague-Dawley cDNA 3' sequence
FQ214134	TL0AAA43YK21 mRNA sequence.
FQ225256	TL0AEA54YJ06 mRNA sequence.
FQ225920	TL0AEA3YL03 mRNA sequence.
FQ229166	TL0ADA48YO02 mRNA sequence.
Frem1	PREDICTED: Fras1 related extracellular matrix 1
Fuca1	Fucosidase, alpha-L- 1, tissue
Fuom	Fucose mutarotase
Fyb	FYN binding protein
Fyco1	FYVE and coiled-coil domain containing 1
Fzd8	Frizzled class receptor 8
Gab1	GRB2-associated binding protein 1
Gabarapl1	GABA
Gatm	Glycine amidinotransferase
Gckr	Glucokinase
Gcsam	PREDICTED: germinal center-associated, signaling and motility
Gfra1	GDNF family receptor alpha 1
Gfra3	GDNF family receptor alpha 3
Ghr	PREDICTED: growth hormone receptor
Glb1l2	PREDICTED: galactosidase, beta 1-like 2
Glipr1	GLI pathogenesis-related 1
Gltscr1l	PREDICTED: GLTSCR1-like
Gmfg	Glia maturation factor, gamma
Gmip	Gem-interacting protein
Golim4	PREDICTED: golgi integral membrane protein 4
Gpam	PREDICTED: glycerol-3-phosphate acyltransferase, mitochondrial
Gpsm3	G-protein signaling modulator 3
Grip2	Glutamate receptor interacting protein 2
Gstcd	Glutathione S-transferase, C-terminal domain containing
Gulp1	GULP, engulfment adaptor PTB domain containing 1
Gzmc	Granzyme C
Hck	Hemopoietic cell kinase
Hcls1	Hematopoietic cell specific Lyn substrate 1
Heph	Hephaestin
Herc3	PREDICTED: HECT and RLD domain containing E3 ubiquitin protein ligase 3
Hgs	Hepatocyte growth factor-regulated tyrosine kinase substrate
Hic2	Hypermethylated in cancer 2
Ick	Intestinal cell kinase
Ifi44	Interferon-induced protein 44
Igf1	Insulin-like growth factor 1
Ikbke	Inhibitor of kappa light polypeptide gene enhancer in B-cells, kinase epsilon
Il18	Interleukin 18
Il34	Interleukin 34
Iqce	PREDICTED: IQ motif containing E
Irf5	Interferon regulatory factor 5
Irf7	Interferon regulatory factor 7
Irs1	Insulin receptor substrate 1
Isg15	ISG15 ubiquitin-like modifier
Itgbl1	Integrin, beta-like 1
Itm2b	Integral membrane protein 2B
Kank2	KN motif and ankyrin repeat domains 2
Kazald1	Kazal-type serine peptidase inhibitor domain 1
Kazn	PREDICTED: kazrin, periplakin interacting protein
Kcnab2	PREDICTED: potassium voltage-gated channel, shaker-related subfamily, beta member 2
Kcnip2	Kv channel-interacting protein 2
Kcnj8	Potassium channel, inwardly rectifying subfamily J, member 8
Kcnn1	PREDICTED: potassium intermediate/small conductance calcium-activated channel, subfamily N, member 1
Kcns3	Potassium voltage-gated channel, modifier subfamily S, member 3
Kctd12	PREDICTED: potassium channel tetramerization domain containing 12
Kdm7a	PREDICTED: jumonji C domain containing histone demethylase 1
Kin	Kin17 DNA and RNA binding protein
Klc3	Kinesin light chain 3
Klhl24	Kelch-like family member 24
Klhl5	Kelch-like family member 5
Laptm5	Lysosomal protein transmembrane 5
Lat2	Linker for activation of T cells family, member 2
Lcp1	Lymphocyte cytosolic protein 1
Lgals3	Lectin, galactoside-binding, soluble, 3
Lgals9	Lectin, galactoside-binding, soluble, 9
Lifr	Leukemia inhibitory factor receptor alpha
Lims2	LIM and senescent cell antigen like domains 2
Lin7c	Lin-7 homolog C
Lmo7	LIM domain 7
LOC100125365	Hypothetical protein LOC100125365
LOC100360552	RCG22430-like
LOC100360772	PREDICTED: zinc finger protein 665-like
LOC100362814	PREDICTED: hypothetical protein LOC100362814
LOC100365047	PREDICTED: scavenger receptor class B, member 2-like
LOC100366216	PREDICTED: nuclear antigen Sp100-like
LOC100910669	PREDICTED: paired immunoglobulin-like type 2 receptor alpha-like
LOC100910792	PREDICTED: amphiphysin-like
LOC100910915	PREDICTED: nmrA-like family domain-containing protein 1-like
LOC100910949	PREDICTED: uncharacterized LOC100910949
LOC100910978	PREDICTED: extracellular matrix protein 2-like
LOC100911384	PREDICTED: uncharacterized LOC100911384
LOC100911572	PREDICTED: collagen alpha-3
LOC100912658	PREDICTED: probable ATP-dependent RNA helicase DDX60-like
LOC102546683	PREDICTED: uncharacterized LOC102546683
LOC102547411	PREDICTED: uncharacterized LOC102547411
LOC102547428	PREDICTED: uncharacterized LOC102547428
LOC102548417	PREDICTED: uncharacterized LOC102548417
LOC102548546	PREDICTED: zinc finger protein 709-like
LOC102548719	PREDICTED: uncharacterized LOC102548719
LOC102549572	PREDICTED: uncharacterized LOC102549572
LOC102550017	PREDICTED: uncharacterized LOC102550017
LOC102550392	PREDICTED: uncharacterized LOC102550392
LOC102551075	PREDICTED: uncharacterized LOC102551075
LOC102552397	PREDICTED: uncharacterized LOC102552397
LOC102553204	PREDICTED: uncharacterized LOC102553204
LOC102553702	PREDICTED: uncharacterized LOC102553702
LOC102553816	PREDICTED: uncharacterized LOC102553816
LOC102554096	PREDICTED: guanylate-binding protein 6-like
LOC102554212	PREDICTED: serine/arginine repetitive matrix protein 3-like
LOC102554789	PREDICTED: uncharacterized LOC102554789
LOC102554909	PREDICTED: uncharacterized LOC102554909
LOC102555756	PREDICTED: uncharacterized LOC102555756
LOC102555870	PREDICTED: uncharacterized LOC102555870
LOC102556671	PREDICTED: uncharacterized LOC102556671
LOC102556969	PREDICTED: uncharacterized LOC102556969
LOC102557498	PREDICTED: collagen alpha-4
LOC103690175	PREDICTED: PHD finger protein 6
LOC103690369	PREDICTED: leukocyte immunoglobulin-like receptor subfamily B member 4
LOC103690467	PREDICTED: uncharacterized LOC103690467
LOC103691014	PREDICTED: uncharacterized LOC103691014
LOC103691362	PREDICTED: uncharacterized LOC103691362
LOC103691479	PREDICTED: uncharacterized LOC103691479
LOC103691760	PREDICTED: vegetative cell wall protein gp1-like
LOC103691845	PREDICTED: uncharacterized LOC103691845
LOC103691913	PREDICTED: uncharacterized LOC103691913
LOC103692134	PREDICTED: uncharacterized LOC103692134
LOC103692282	PREDICTED: uncharacterized LOC103692282
LOC103692639	PREDICTED: uncharacterized LOC103692639
LOC103693294	PREDICTED: uncharacterized LOC103693294
LOC103693338	PREDICTED: uncharacterized LOC103693338
LOC103693968	PREDICTED: uncharacterized LOC103693968
LOC103694232	PREDICTED: uncharacterized LOC103694232
LOC103694886	PREDICTED: complement component C7-like
LOC103694982	PREDICTED: uncharacterized LOC103694982
LOC298139	Similar to RIKEN cDNA 2310003M01
LOC499407	PREDICTED: LRRGT00097
LOC499602	Hypothetical protein LOC499602
LOC502003	PREDICTED: similar to granzyme C
LOC679565	PREDICTED: similar to acyl-Coenzyme A binding domain containing 5
LOC683897	Similar to Protein C6orf203
LOC684681	PREDICTED: similar to Histone H1.2
LOC688547	PREDICTED: similar to major urinary protein 4
LOC689065	Hypothetical protein LOC689065
LOC690138	PREDICTED: similar to UPF0197 protein C11orf10 homolog
LOC691485	PREDICTED: hypothetical protein LOC691485
LOC691853	PREDICTED: similar to COX10 homolog, cytochrome c oxidase assembly protein, heme A: farnesyltransferase
LOC691995	Hypothetical protein LOC691995
Lrp4	Low density lipoprotein receptor-related protein 4
Lrrc39	Leucine rich repeat containing 39
Lrrc48	Leucine rich repeat containing 48
Lrrc56	Leucine rich repeat containing 56
Lsp1	Lymphocyte-specific protein 1
Lst1	Leukocyte specific transcript 1
Ltb	Lymphotoxin beta
Maf	PREDICTED: v-maf avian musculoaponeurotic fibrosarcoma oncogene homolog
Mapt	Microtubule-associated protein tau
Mbnl1	Muscleblind-like splicing regulator 1
Mbp	Myelin basic protein
Mef2d	Myocyte enhancer factor 2D
Metrnl	Meteorin, glial cell differentiation regulator-like
Mfn1	PREDICTED: mitofusin 1
Mfsd7	Major facilitator superfamily domain containing 7
Mgat3	Mannosyl (beta-1,4-)-glycoprotein beta-1,4-N-acetylglucosaminyltransferase
Mid2	Midline 2
Mknk2	MAP kinase-interacting serine/threonine kinase 2
Mppe1	Metallophosphoesterase 1
Mrgprx3	MAS-related GPR, member X3
Mrpl20	Mitochondrial ribosomal protein L20
Mrps35	Mitochondrial ribosomal protein S35
Mthfsd	PREDICTED: methenyltetrahydrofolate synthetase domain containing
Mtus1	Microtubule associated tumor suppressor 1
Mx1	Myxovirus (influenza virus) resistance 1
Mycl	PREDICTED: v-myc avian myelocytomatosis viral oncogene lung carcinoma derived homolog
Myh7b	Myosin, heavy chain 7B, cardiac muscle, beta
Mylip	Myosin regulatory light chain interacting protein
Myo1g	Myosin IG
Myocd	Myocardin
Myoz1	Myozenin 1
Myrf	Myelin regulatory factor
Naa40	N(alpha)-acetyltransferase 40, NatD catalytic subunit
Naalad2	PREDICTED: N-acetylated alpha-linked acidic dipeptidase 2
Narfl	Nuclear prelamin A recognition factor-like
Nck2	NCK adaptor protein 2
Ndrg2	NDRG family member 2
NEWGENE_2301	PREDICTED: uncharacterized LOC103692031
Nexn	Nexilin
Nfam1	PREDICTED: NFAT activating protein with ITAM motif 1
Nfatc2	PREDICTED: nuclear factor of activated T-cells, cytoplasmic, calcineurin-dependent 2
Nfic	PREDICTED: nuclear factor I/C
Nipsnap1	Nipsnap homolog 1
Nkain4	Na+/K+ transporting ATPase interacting 4
Nr0b2	Nuclear receptor subfamily 0, group B, member 2
Nr2f1	Nuclear receptor subfamily 2, group F, member 1
Nrarp	Notch-regulated ankyrin repeat protein
Nrp1	Neuropilin 1
Nrxn2	Neurexin 2
Nsa2	NSA2 ribosome biogenesis homolog
Nt5c	5', 3'-nucleotidase, cytosolic
Nupr1	Nuclear protein, transcriptional regulator, 1
Nxpe1	Neurexophilin and PC-esterase domain family, member 1
Oas1a	2'-5' oligoadenylate synthetase 1A
Olfml1	Olfactomedin-like 1
Omd	Osteomodulin
Osbpl6	PREDICTED: oxysterol binding protein-like 6
Paqr4	Progestin and adipoQ receptor family member IV
Pbx4	Pre-B-cell leukemia homeobox 4
Pcdh19	PREDICTED: protocadherin 19
Pcolce	Procollagen C-endopeptidase enhancer
Pdrg1	P53 and DNA damage regulated 1
Pdzrn3	PDZ domain containing RING finger 3
Perm1	PPARGC1 and ESRR induced regulator, muscle 1
Phf11b	PHD finger protein 11B
Phldb1	Pleckstrin homology-like domain, family B, member 1
Phldb2	PREDICTED: pleckstrin homology-like domain, family B, member 2
Pias3	Protein inhibitor of activated STAT, 3
Pkig	Protein kinase
Plcb4	Phospholipase C, beta 4
Plcd3	Phospholipase C, delta 3
Plekha1	Pleckstrin homology domain containing, family A
Plekhb1	Pleckstrin homology domain containing, family B
Plp1	Proteolipid protein 1
Plxna1	PREDICTED: plexin A1
Pmm1	Phosphomannomutase 1
Polr3gl	Polymerase
Ppargc1b	Peroxisome proliferator-activated receptor gamma, coactivator 1 beta
Ppfibp2	PTPRF interacting protein, binding protein 2
Ppih	PREDICTED: peptidylprolyl isomerase H
Ppil4	Peptidylprolyl isomerase
Ppip5k1	Diphosphoinositol pentakisphosphate kinase 1
Ppp1r14a	Protein phosphatase 1, regulatory
Ppp1r3c	Protein phosphatase 1, regulatory subunit 3C
Ppp3ca	Protein phosphatase 3, catalytic subunit, alpha isozyme
Ppp4r4	Protein phosphatase 4, regulatory subunit 4
Prkag3	Protein kinase, AMP-activated, gamma 3 non-catalytic subunit
Prkcb	Protein kinase C, beta
Prpf18	PRP18 pre-mRNA processing factor 18 homolog
Prph	Peripherin
Ptp4a3	Protein tyrosine phosphatase type IVA, member 3
Ptpn18	Protein tyrosine phosphatase, non-receptor type 18
Ptpn21	Protein tyrosine phosphatase, non-receptor type 21
Ptpn4	Protein tyrosine phosphatase, non-receptor type 4
Ptpn6	Protein tyrosine phosphatase, non-receptor type 6
Ptpn7	Protein tyrosine phosphatase, non-receptor type 7
Ptprc	Protein tyrosine phosphatase, receptor type, C
Ptprcap	Protein tyrosine phosphatase, receptor type, C-associated protein
Ptpro	Protein tyrosine phosphatase, receptor type, O
Qki	PREDICTED: protein quaking-like
Rab11fip4	PREDICTED: RAB11 family interacting protein 4
Rab5al1	PREDICTED: Rab5a, member RAS oncogene family-like 1
Rab7b	Rab7b, member RAS oncogene family
Rac2	Ras-related C3 botulinum toxin substrate 2
Ranbp3l	PREDICTED: RAN binding protein 3-like
Rasa3	R-ras GAP mRNA for R-ras GTPase activating protein, partial cds.
Rasal3	RAS protein activator like 3
Rasd2	RASD family, member 2
Rasgrp3	RAS guanyl releasing protein 3
Rb1cc1	RB1-inducible coiled-coil 1
Rftn2	PREDICTED: raftlin family member 2
RGD1304694	Similar to CG9646-PA
RGD1309651	PREDICTED: similar to 1190005I06Rik protein
RGD1310852	Similar to RIKEN cDNA 9130401M01
RGD1559864	PREDICTED: similar to mKIAA1045 protein
RGD1562037	PREDICTED: similar to OTTHUMP00000046255
RGD1562339	PREDICTED: RGD1562339
RGD1564899	PREDICTED: similar to chromosome 10 open reading frame 71
RGD1565355	Similar to fatty acid translocase/CD36
Rgl1	PREDICTED: ral guanine nucleotide dissociation stimulator,-like 1
Rgl3	Ral guanine nucleotide dissociation stimulator-like 3
Rgs10	Regulator of G-protein signaling 10
Rgs14	Regulator of G-protein signaling 14
Rgs3	Regulator of G-protein signaling 3
Rimbp2	RIMS binding protein 2
Ripply2	PREDICTED: ripply transcriptional repressor 2
Rnf115	Ring finger protein 115
Rnf152	Ring finger protein 152
Rnf166	Ring finger protein 166
Rnf39	Ring finger protein 39
Rsad2	Radical S-adenosyl methionine domain containing 2
Rtp4	Receptor (chemosensory) transporter protein 4
Runx1t1	Runt-related transcription factor 1; translocated to, 1
S100a6	S100 calcium binding protein A6
S100b	S100 calcium binding protein B
Samd1	PREDICTED: atherin-like
Sash1	PREDICTED: SAM and SH3 domain containing 1
Sbsn	Suprabasin
Scn1a	Sodium channel, voltage-gated, type I, alpha subunit
Scrn1	PREDICTED: secernin 1
Scrn3	PREDICTED: secernin 3
Seh1l	PREDICTED: SEH1-like
Sema3b	Sema domain, immunoglobulin domain (Ig), short basic domain, secreted, semaphorin) 3B
Sema4d	Sema domain, immunoglobulin domain
Sema6a	PREDICTED: sema domain, transmembrane domain
Senp7	SUMO1/sentrin specific peptidase 7
Sept4	Septin 4
Sept6	Septin 6
Sept9	Septin 9
Serp2	Stress-associated endoplasmic reticulum protein family member 2
Sgcg	Sarcoglycan, gamma
Sh2d4a	SH2 domain containing 4A
Sh3bp2	SH3-domain binding protein 2
Sh3bp5	SH3-domain binding protein 5
Sh3rf1	PREDICTED: SH3 domain containing ring finger 1
Siglec10	Sialic acid binding Ig-like lectin 10
Sirt2	Sirtuin 2
Sirt5	Sirtuin 5
Skida1	PREDICTED: SKI/DACH domain containing 1
Slain2	SLAIN motif family, member 2
Slamf8	SLAM family member 8
Slc12a3	Solute carrier family 12
Slc13a3	Solute carrier family 13
Slc25a42	Solute carrier family 25, member 42
Slc26a6	Solute carrier family 26
Slc27a1	Solute carrier family 27
Slc29a1	Solute carrier family 29
Slc9a9	Solute carrier family 9, subfamily A
Slfn5	PREDICTED: schlafen family member 5
Smim1	PREDICTED: small integral membrane protein 1
Snn	Stannin
Snph	Syntaphilin
Snx2	Sorting nexin 2
Sod3	Superoxide dismutase 3, extracellular
Spi1	Spi-1 proto-oncogene
Srgap3	PREDICTED: SLIT-ROBO Rho GTPase activating protein 3
Srp68	Signal recognition particle 68
St3gal6	ST3 beta-galactoside alpha-2,3-sialyltransferase 6
Stk36	Serine/threonine kinase 36
Stmn1	Stathmin 1
Sult1a1	Sulfotransferase family, cytosolic, 1A, phenol-preferring, member 1
Sult5a1	Sulfotransferase family 5A, member 1
Svil	PREDICTED: supervillin
Synj2	Synaptojanin 2
Synpo2l	Synaptopodin 2-like
Syt5	Synaptotagmin V
Sytl4	PREDICTED: synaptotagmin-like 4
Tango2	Transport and golgi organization 2 homolog
Tbc1d31	TBC1 domain family, member 31
Tcf7l2	Transcription factor 7-like 2
Tjp1	Tight junction protein 1
Tk2	Thymidine kinase 2, mitochondrial
Tln1	Talin 1
Tlr12	PREDICTED: toll-like receptor 12
Tlr6	Toll-like receptor 6
Tmem171	Transmembrane protein 171
Tmem179	Transmembrane protein 179
Tmem258b	PREDICTED: transmembrane protein 258 B
Tmem52	PREDICTED: transmembrane protein 52
Tmsb10	Thymosin, beta 10
Tnfaip8	Tumor necrosis factor, alpha-induced protein 8
Tnfsf12	Tumor necrosis factor ligand superfamily member 12
Tnxa-ps1	Tenascin XA, pseudogene 1
Tox3	TOX high mobility group box family member 3
Tpbgl	PREDICTED: trophoblast glycoprotein-like
Tppp3	Tubulin polymerization-promoting protein family member 3
Tprg1l	Tumor protein p63 regulated 1-like
Trerf1	Transcriptional regulating factor 1
Trim21	PREDICTED: tripartite motif-containing 21
Trim7	PREDICTED: tripartite motif-containing 7
Trpc1	Transient receptor potential cation channel, subfamily C, member 1
Trpc3	Transient receptor potential cation channel, subfamily C, member 3
Tspo2	PREDICTED: translocator protein 2
Ttc7b	PREDICTED: tetratricopeptide repeat domain 7B
Ttll7	PREDICTED: tubulin tyrosine ligase-like family, member 7
Tuba8	Tubulin, alpha 8
Tubb2b	Tubulin, beta 2B class IIb
Tyrobp	Tyro protein tyrosine kinase binding protein
Ube2j1	PREDICTED: ubiquitin-conjugating enzyme E2, J1
Ubr7	Ubiquitin protein ligase E3 component n-recognin 7
Unc93b1	Unc-93 homolog B1
Usp18	Ubiquitin specific peptidase 18
Usp25	Ubiquitin specific peptidase 25
Usp27x	PREDICTED: ubiquitin specific peptidase 27, X-linked
Vamp4	Vesicle-associated membrane protein 4
Vav1	Vav 1 guanine nucleotide exchange factor
Vav2	Vav 2 guanine nucleotide exchange factor
Vipas39	VPS33B interacting protein, apical-basolateral polarity regulator, spe-39 homolog
Vipr1	Vasoactive intestinal peptide receptor 1
Vipr2	Vasoactive intestinal peptide receptor 2
Vom2r-ps135	PREDICTED: vomeronasal 2 receptor, pseudogene 135
Vps33b	Vacuolar protein sorting 33 homolog B
Wdr35l	WD repeat domain 35-like
Wipf3	PREDICTED: WAS/WASL interacting protein family, member 3
Wnt11	Wingless-type MMTV integration site family, member 11
XM_001061848	PREDICTED: hypothetical protein LOC684998
Yif1a	Yip1 interacting factor homolog A
Yipf5	Yip1 domain family, member 5
Zbtb4	Zinc finger and BTB domain containing 4
Zbtb7b	Zinc finger and BTB domain containing 7B
Zc3h12d	Zinc finger CCCH type containing 12D
Zfp14	ZFP14 zinc finger protein
Zfp362	PREDICTED: zinc finger protein 362
Zfp606	PREDICTED: zinc finger protein 606
Zfp618	PREDICTED: zinc finger protein 618
Zfp62	PREDICTED: zinc finger protein 62
Zfp629	Zinc finger protein 629
Zfp641	Zinc finger protein 641
Zfp668	Zinc finger protein 668
Zfp955a	Zinc finger protein 955A
Zmynd8	PREDICTED: zinc finger, MYND-type containing 8
Zscan18	PREDICTED: zinc finger and SCAN domain containing 18
			Sema4d)

## Sheet: Male Down in landiolol
List of the 418 genes in male significantly down-regulated in CLP+Lnd vs CLP (SAM 2, FDR<0,05). The common genes between male and female are found in blue.
Gene	Description
A2m	Alpha-2-macroglobulin
AA925776	cDNA clone UI-R-A1-ep-h-12-0-UI 3' sequence
Abcc4	ATP-binding cassette, subfamily C
Abl1	ABL proto-oncogene 1, non-receptor tyrosine kinase
Abr	Active BCR-related
Ace	Angiotensin I converting enzyme
Acer2	Alkaline ceramidase 2
Adam15	ADAM metallopeptidase domain 15
Adam17	ADAM metallopeptidase domain 17
Adamts9	ADAM metallopeptidase with thrombospondin type 1 motif, 9
Adora3	Adenosine A3 receptor
Ago2	Argonaute RISC catalytic component 2
Ahsg	Alpha-2-HS-glycoprotein
AI176665	cDNA clone ROVBV30 3' end sequence
AI556689	cDNA clone UI-R-C2p-rj-c-12-0-UI 3' sequence
Akap13	A kinase (PRKA) anchor protein 13
Akt2	PREDICTED: v-akt murine thymoma viral oncogene homolog 2
Alg14	ALG14, UDP-N-acetylglucosaminyltransferase subunit
Alkbh6	AlkB, alkylation repair homolog 6
Ankh	ANKH inorganic pyrophosphate transport regulator
Anp32b	Acidic (leucine-rich) nuclear phosphoprotein 32 family, member B
Antxr2	PREDICTED: anthrax toxin receptor 2
Anxa6	Annexin A6
Arhgap10	Rho GTPase activating protein 10
Arhgap31	Rho GTPase activating protein 31
Arl5a	PREDICTED: ADP-ribosylation factor-like 5A
Atl3	Atlastin GTPase 3
Atp2a2	ATPase, Ca++ transporting, cardiac muscle, slow twitch 2
AW914998	EST346302 Normalized rat ovary, Bento Soares Rattus sp. cDNA clone RGIBN31 5' end sequence
B4galt1	UDP-Gal:betaGlcNAc beta 1,4- galactosyltransferase, polypeptide 1
B4galt6	UDP-Gal:betaGlcNAc beta 1,4-galactosyltransferase, polypeptide 6
Bcar1	Breast cancer anti-estrogen resistance 1
Bcat1	Branched chain amino acid transaminase 1, cytosolic
Bdh1	3-hydroxybutyrate dehydrogenase, type 1
BF564093	UI-R-C4-ald-d-09-0-UI.r1 UI-R-C4 cDNA clone UI-R-C4-ald-d-09-0-UI 5' sequence
Bfsp1	Beaded filament structural protein 1, filensin
BP486224	BP486224 insulinoma RINm5F cDNA clone RI03054 3' sequence
Btbd9	PREDICTED: BTB (POZ) domain containing 9
Bzw2	Basic leucine zipper and W2 domains 2
CA510202	cDNA clone UI-R-FS0-cqt-j-12-0-UI 3' sequence
CA510595	cDNA clone UI-R-FJ0-cpu-g-24-0-UI 5' sequence
Cacna1c	PREDICTED: calcium channel, voltage-dependent, L type, alpha 1C subunit
Camta1	Calmodulin binding transcription activator 1
Capn10	Calpain 10
Car8	Carbonic anhydrase 8
CB324499	cDNA clone UI-R-DZ0-crj-l-13-0-UI 3' sequence
Ccdc167	Coiled-coil domain containing 167
Ccdc85c	PREDICTED: coiled-coil domain containing 85C
CD373272	UI-R-GO0-csi-d-20-0-UI.r1 UI-R-GO0 cDNA clone UI-R-GO0-csi-d-20-0-UI 5' sequence
Cd59	CD59 molecule, complement regulatory protein
Cda	Cytidine deaminase
Cenpa	Centromere protein A
Cep19	Centrosomal protein 19
Cerk	Ceramide kinase
CF110455	SHultzomica03706 Rat lung airway and parenchyma cDNA libraries cDNA clone Contig3284 5' sequence
CF114236	SHultzomica07487 Rat lung airway and parenchyma cDNA libraries cDNA clone NA4853 5' sequence
Cfdp1	Craniofacial development protein 1
CK357683	cDNA clone IMAGE:7105011 5' sequence
CK653326	cDNA clone IMAGE:7114503 5' sequence
Clec2d	PREDICTED: C-type lectin domain family 2, member D
Clu	Clusterin
Cntnap1	Contactin associated protein 1
Corin	Corin, serine peptidase
Cpne8	Copine VIII
Crem	CAMP responsive element modulator
Cryba1	Crystallin, beta A1
Csf2rb	Colony stimulating factor 2 receptor, beta, low-affinity
Csnk1a1	Casein kinase 1, alpha 1
Cstf3	PREDICTED: cleavage stimulation factor, 3' pre-RNA, subunit 3, 77kDa
Ctla2a	Cytotoxic T lymphocyte-associated protein 2 alpha
Cttn	Cortactin
CX570057	RVL1169 Wackym-Soares normalized rat vestibular cDNA library cDNA 5' sequence
Dbh	Dopamine beta-hydroxylase
Dcdc5	Doublecortin domain containing 5
Ddx31	DEAD (Asp-Glu-Ala-Asp) box polypeptide 31
Defb4	Defensin beta 4
Depdc5	DEP domain containing 5
Depdc7	DEP domain containing 7
Dlc1	TL0ACA48YA14 mRNA sequence.
Dlgap1	Discs, large (Drosophila) homolog-associated protein 1
Dos	Downstream of Stk11
Dph3	Diphthamide biosynthesis 3
DV719240	RVL9956 Wackym-Soares normalized rat vestibular cDNA library cDNA 5' sequence
Dyrk3	Dual-specificity tyrosine-
Ebf1	Early B-cell factor 1
Ecscr	PREDICTED: endothelial cell surface expressed chemotaxis and apoptosis regulator
Ednrb	Endothelin receptor type B
Eefsec	Eukaryotic elongation factor, selenocysteine-tRNA-specific
Eif3d	Eukaryotic translation initiation factor 3, subunit D
ENSRNOT00000004262	Similar to DKFZP586M1523 protein
ENSRNOT00000007419	PREDICTED: glucoside xylosyltransferase 2
ENSRNOT00000008321	PREDICTED: laminin, beta 1
ENSRNOT00000008901	Similar to Probable chromodomain-helicase-DNA-binding protein KIAA1416
ENSRNOT00000009115	PREDICTED: ubiquitin protein ligase E3 component n-recognin 5
ENSRNOT00000011061	PREDICTED: WW and C2 domain containing 1
ENSRNOT00000012495	TL0AEA71YA19 mRNA sequence.
ENSRNOT00000012543	Unknown
ENSRNOT00000013761	Unknown
ENSRNOT00000014191	PREDICTED: similar to dystonin isoform 1
ENSRNOT00000018251	PREDICTED: hypothetical protein LOC691161
ENSRNOT00000018953	PREDICTED: forkhead-associated
ENSRNOT00000020833	Unknown
ENSRNOT00000022117	CDNA clone IMAGE:7107662, containing frame-shift errors.
ENSRNOT00000022410	PREDICTED: RNA
ENSRNOT00000024174	PREDICTED: RAN binding protein 9
ENSRNOT00000024556	Unknown
ENSRNOT00000025426	Unknown
ENSRNOT00000026249	TL0AAA58YK08 mRNA sequence.
ENSRNOT00000026448	PREDICTED: ArfGAP with RhoGAP domain, ankyrin repeat and PH domain 1
ENSRNOT00000026654	PREDICTED: protein tyrosine phosphatase, receptor type, N
ENSRNOT00000029109	PREDICTED: family with sequence similarity 189, member A2
ENSRNOT00000029593	PREDICTED: regulator of calcineurin 2
ENSRNOT00000029774	Unknown
ENSRNOT00000029982	Unknown
ENSRNOT00000030798	PREDICTED: alpha-kinase 1
ENSRNOT00000030996	PREDICTED: nucleoporin 188
ENSRNOT00000032974	PREDICTED: elongation factor RNA polymerase II 2
ENSRNOT00000036340	Unknown
ENSRNOT00000036374	PREDICTED: family with sequence similarity 179, member A
ENSRNOT00000036995	PREDICTED: ADAMTS-like 2
ENSRNOT00000039846	PREDICTED: heterogeneous nuclear ribonucleoprotein A1-like
ENSRNOT00000040517	Unknown
ENSRNOT00000041472	Unknown
ENSRNOT00000041777	PREDICTED: eukaryotic translation initiation factor 4 gamma, 1
ENSRNOT00000044346	TL0ACA43YI20 mRNA sequence.
ENSRNOT00000048218	PREDICTED: pericentrin
ENSRNOT00000048258	Unknown
ENSRNOT00000050834	PREDICTED: transcriptional enhancer factor TEF-3-like
ENSRNOT00000050867	PREDICTED: similar to 40S ribosomal protein S2
ENSRNOT00000054974	PREDICTED: similar to hypothetical protein FLJ22175
ENSRNOT00000058142	Unknown
ENSRNOT00000058884	Unknown
ENSRNOT00000058957	Unknown
ENSRNOT00000065971	CDNA clone IMAGE:9033955.
ENSRNOT00000072580	PREDICTED: endothelial cell surface expressed chemotaxis and apoptosis regulator
ENSRNOT00000072596	Unknown
ENSRNOT00000072949	PREDICTED: dynein, axonemal, heavy chain 8
ENSRNOT00000072952	PREDICTED: patatin-like phospholipase domain containing 6
ENSRNOT00000073526	Unknown
ENSRNOT00000074647	Unknown
ENSRNOT00000075631	Similar to Fatty acid-binding protein, epidermal
Entpd1	Ectonucleoside triphosphate diphosphohydrolase 1
Epb4.1	PREDICTED: erythrocyte membrane protein band 4.1
Epha7	Eph receptor A7
Ercc3	Excision repair cross-complementation group 3
EV764448	AGENCOURT_109871491 NIH_MGC_418 cDNA clone IMAGE:9022941 5' sequence
EV780191	AGENCOURT_114823178 NIH_MGC_433 cDNA clone IMAGE:9100673 5' sequence
EX490449	AGENCOURT_118848732 NIH_MGC_246 cDNA clone IMAGE:8882493 5' sequence
Exosc2	Exosome component 2
Fabp5	Fatty acid binding protein 5, epidermal
Fam161a	Family with sequence similarity 161, member A
Fat1	FAT atypical cadherin 1
Fgf2	Fibroblast growth factor 2
Fli1	Fli-1 proto-oncogene, ETS transcription factor
Flot1	Flotillin 1
FM100783	FM100783 etnofat cDNA clone etnofatP0057O21 5' sequence
Fndc3b	Fibronectin type III domain containing 3B
Foxn3	Forkhead box N3
Foxq1	Forkhead box Q1
FQ220235	TL0ADA43YL03 mRNA sequence.
FQ230284	TL0AEA9YK01 mRNA sequence.
FQ233225	TL0AEA62YL02 mRNA sequence.
Fut8	Fucosyltransferase 8
G3bp2	PREDICTED: GTPase activating protein
Gars	Glycyl-tRNA synthetase
Gatad2a	GATA zinc finger domain containing 2A
Gatad2b	GATA zinc finger domain containing 2B
Gatsl2	GATS protein-like 2
Gdf11	Growth differentiation factor 11
Gga2	Golgi associated, gamma adaptin ear containing, ARF binding protein 2
Gpn2	GPN-loop GTPase 2
Grk5	PREDICTED: G protein-coupled receptor kinase 5
Hcfc1	Host cell factor C1
Heatr1	HEAT repeat containing 1
Herc4	HECT and RLD domain containing E3 ubiquitin protein ligase 4
Hivep2	Human immunodeficiency virus type I enhancer binding protein 2
Hmox1	Heme oxygenase 1
Hnrnpa1	Heterogeneous nuclear ribonucleoprotein A1
Hspa8	Heat shock 70kDa protein 8
Hspb1	Heat shock protein B1
Htra1	HtrA serine peptidase 1
Htra2	HtrA serine peptidase 2
Htt	Huntingtin
Ids	PREDICTED: iduronate 2-sulfatase
Igsf3	Immunoglobulin superfamily, member 3
Il6r	Interleukin 6 receptor
Impdh2	IMP (inosine 5'-monophosphate) dehydrogenase 2
Inha	Inhibin alpha
Ippk	Inositol 1,3,4,5,6-pentakisphosphate 2-kinase
Itgb6	Integrin, beta 6
Jmjd1c	Jumonji domain containing 1C
Kcng4	Potassium channel, voltage gated modifier subfamily G, member 4
Kctd1	Potassium channel tetramerization domain containing 1
Kif5b	PREDICTED: kinesin family member 5B
Klhl41	Kelch-like family member 41
Krt7	PREDICTED: keratin 7
Lbp	Lipopolysaccharide binding protein
Lce1f	Late cornified envelope 1F
Lcn2	Lipocalin 2
Ldlrad4	Low density lipoprotein receptor class A domain containing 4
Lgalsl	Lectin, galactoside-binding-like
Lims1	LIM and senescent cell antigen-like domains 1
Lmtk2	Lemur tyrosine kinase 2
Lnx2	Ligand of numb-protein X 2
LOC100158225	Hypothetical protein LOC100158225
LOC100909406	PREDICTED: uncharacterized LOC100909406
LOC100912209	PREDICTED: uncharacterized LOC100912209
LOC100912483	PREDICTED: uncharacterized LOC100912483
LOC100912742	PREDICTED: zinc finger protein 845-like
LOC100912880	PREDICTED: uncharacterized LOC100912880
LOC102546992	PREDICTED: uncharacterized LOC102546992
LOC102547047	PREDICTED: uncharacterized LOC102547047
LOC102547522	PREDICTED: uncharacterized LOC102547522
LOC102547523	PREDICTED: uncharacterized LOC102547523
LOC102548772	PREDICTED: uncharacterized LOC102548772
LOC102548822	PREDICTED: uncharacterized LOC102548822
LOC102550100	PREDICTED: uncharacterized LOC102550100
LOC102550584	PREDICTED: hornerin-like
LOC102550889	PREDICTED: uncharacterized LOC102550889
LOC102551968	PREDICTED: uncharacterized LOC102551968
LOC102552343	PREDICTED: uncharacterized LOC102552343
LOC102552786	PREDICTED: uncharacterized LOC102552786
LOC102553109	PREDICTED: uncharacterized LOC102553109
LOC102553824	PREDICTED: uncharacterized LOC102553824
LOC102554570	PREDICTED: uncharacterized LOC102554570
LOC102555426	PREDICTED: uncharacterized LOC102555426
LOC102555451	PREDICTED: uncharacterized LOC102555451
LOC102556115	PREDICTED: uncharacterized LOC102556115
LOC102556488	PREDICTED: uncharacterized LOC102556488
LOC103690183	PREDICTED: cytosolic carboxypeptidase 2-like
LOC103690340	PREDICTED: zinc finger protein 431-like
LOC103690397	PREDICTED: uncharacterized LOC103690397
LOC103690881	PREDICTED: uncharacterized LOC103690881
LOC103690937	PREDICTED: protein fem-1 homolog B-like
LOC103691381	PREDICTED: uncharacterized LOC103691381
LOC103692498	PREDICTED: uncharacterized LOC103692498
LOC103692572	PREDICTED: uncharacterized LOC103692572
LOC103692832	PREDICTED: uncharacterized LOC103692832
LOC103693537	PREDICTED: keratin-associated protein 13-1-like
LOC103693713	PREDICTED: uncharacterized LOC103693713
LOC103694141	PREDICTED: uncharacterized LOC103694141
LOC103694362	PREDICTED: uncharacterized LOC103694362
LOC103694506	PREDICTED: ubiquitin-conjugating enzyme E2 W
LOC103694914	PREDICTED: uncharacterized LOC103694914
LOC103694987	PREDICTED: uncharacterized LOC103694987
LOC303566	E2F1-inducible gene
LOC501230	PREDICTED: similar to nidogen 2
LOC689316	PREDICTED: hypothetical protein LOC689316
Lpp	PREDICTED: LIM domain containing preferred translocation partner in lipoma
Lrch1	PREDICTED: leucine-rich repeats and calponin homology
Lsm12	LSM12 homolog
Lsm6	LSM6 homolog, U6 small nuclear RNA associated
Lypd3	Ly6/Plaur domain containing 3
Maged1	Melanoma antigen, family D, 1
Man1a1	Mannosidase, alpha, class 1A, member 1
Map3k2	Mitogen activated protein kinase kinase kinase 2
Mapk14	Mitogen activated protein kinase 14
Mapkapk2	Mitogen-activated protein kinase-activated protein kinase 2
Mapre2	Microtubule-associated protein, RP/EB family, member 2
Mark1	PREDICTED: MAP/microtubule affinity-regulating kinase 1
Max	MYC associated factor X
Mbnl2	Muscleblind-like splicing regulator 2
Mcm4	Minichromosome maintenance complex component 4
Mex3a	PREDICTED: mex-3 RNA binding family member A
Mgst2	Microsomal glutathione S-transferase 2
Mical3	Microtubule associated monoxygenase, calponin and LIM domain containing 3
Mmp24	Matrix metallopeptidase 24
Msn	Moesin
Mt1a	Metallothionein 1a
Mt2A	Metallothionein 2A
Mtf1	Metal-regulatory transcription factor 1
Mturn	Maturin, neural progenitor differentiation regulator homolog
Mtus2	PREDICTED: microtubule associated tumor suppressor candidate 2
Mynn	Myoneurin
Myot	Myotilin
Nacc1	PREDICTED: nucleus accumbens associated 1, BEN and BTB
Nap1l5	Nucleosome assembly protein 1-like 5
Net1	Neuroepithelial cell transforming 1
Nfil3	Nuclear factor, interleukin 3 regulated
Nfkb1	Nuclear factor of kappa light polypeptide gene enhancer in B-cells 1
Nhp2	NHP2 ribonucleoprotein
Nipsnap3b	Nipsnap homolog 3B
Nkd1	Naked cuticle homolog 1
Nle1	Notchless homolog 1
Nob1	NIN1/RPN12 binding protein 1 homolog
Nol8	Nucleolar protein 8
Nop16	NOP16 nucleolar protein
Nos1ap	Nitric oxide synthase 1
Ntf3	Neurotrophin 3
Ntm	PREDICTED: neurotrimin
Ntrk2	Neurotrophic tyrosine kinase, receptor, type 2
Nudt4	Nudix
Nup205	Nucleoporin 205
Nup88	Nucleoporin 88
Nup93	Nucleoporin 93
Obfc1	Oligonucleotide/oligosaccharide-binding fold containing 1
Odf3l1	Outer dense fiber of sperm tails 3-like 1
Pak6	PREDICTED: p21 protein
Pde10a	Phosphodiesterase 10A
Pdlim1	PDZ and LIM domain 1
Pdlim5	PREDICTED: PDZ and LIM domain 5
Pfas	Phosphoribosylformylglycinamidine synthase
Pgam1	Phosphoglycerate mutase 1
Phyhd1	Phytanoyl-CoA dioxygenase domain containing 1
Pla1a	Phospholipase A1 member A
Pla2g2d	Phospholipase A2, group IID
Pm20d2	Peptidase M20 domain containing 2
Ppid	Peptidylprolyl isomerase D
Ppp2r5c	Protein phosphatase 2, regulatory subunit B', gamma
Ppp3r1	Protein phosphatase 3, regulatory subunit B, alpha
Prepl	Prolyl endopeptidase-like
Prg4	Proteoglycan 4
Prpf4	Pre-mRNA processing factor 4
Prr14l	PREDICTED: proline rich 14-like
Prrc2a	Proline-rich coiled-coil 2A
Ptpn12	Protein tyrosine phosphatase, non-receptor type 12
Ptpn2	Protein tyrosine phosphatase, non-receptor type 2
Ptprk	Protein tyrosine phosphatase, receptor type, K
Ptprn	Protein tyrosine phosphatase, receptor type, N
Puf60	Poly-U binding splicing factor 60
Pxk	PX domain containing serine/threonine kinase
Pycr1	PREDICTED: pyrroline-5-carboxylate reductase 1
Pygo2	Pygopus family PHD finger 2
Rab30	PREDICTED: RAB30, member RAS oncogene family
Rabggta	RAt rab geranylgeranyl transferase alpha-subunit mRNA, complete cds.
Raet1e	FN805004 etcmemb cDNA clone etcmembP0030F07 sequence
Rap1a	RAP1A, member of RAS oncogene family
Rarb	Retinoic acid receptor, beta
Rbks	Ribokinase
Rbm12	RNA binding motif protein 12
Rc3h1	PREDICTED: ring finger and CCCH-type domains 1
Rd3l	Retinal degeneration 3-like
Reep2	Receptor accessory protein 2
RGD1304884	PREDICTED: similar to RIKEN cDNA 6430548M08
RGD1306926	PREDICTED: similar to hypothetical protein FLJ22175
RGD1311703	Similar to sid2057p
RGD1311747	Similar to 2700029M09Rik protein
RGD1311946	Similar to RIKEN cDNA 1810055G02
RGD1561149	Similar to mKIAA1522 protein
RGD1561618	PREDICTED: hypothetical gene supported by X58200
Rgs19	Regulator of G-protein signaling 19
Rgs7bp	Regulator of G-protein signaling 7 binding protein
Rhbdd1	PREDICTED: rhomboid domain containing 1
Rhot1	Ras homolog gene family, member T1
Rpl10a	Ribosomal protein L10A
Rps6ka5	Ribosomal protein S6 kinase, polypeptide 5
Rsph1	Radial spoke head 1 homolog
Ruvbl1	RuvB-like AAA ATPase 1
S1pr2	Sphingosine-1-phosphate receptor 2
Scamp1	Secretory carrier membrane protein 1
Scp2	Sterol carrier protein 2
Selt	Selenoprotein T
Sema4b	Sema domain, immunoglobulin domain
Setl1	SET translocation-like 1
Shc1	SHC
Slc1a1	MRNA for neuronal high affinity glutamate transporter, complete cds.
Slc35b4	Solute carrier family 35
Slc35f6	Solute carrier family 35, member F6
Slc38a1	PREDICTED: solute carrier family 38, member 1
Slc39a14	Solute carrier family 39, member 14
Slc39a6	Solute carrier family 39, member 6
Slc44a2	Solute carrier family 44, member 2
Slc6a17	Solute carrier family 6, member 17
Slc7a1	Solute carrier family 7, member 1
Slc7a5	Solute carrier family 7, member 5
Slk	PREDICTED: STE20-like kinase
Spata20	Spermatogenesis associated 20
Sphkap	PREDICTED: SPHK1 interactor, AKAP domain containing
Spink6	Serine peptidase inhibitor, Kazal type 6
Sptlc2	Serine palmitoyltransferase, long chain base subunit 2
Ssr4	Signal sequence receptor, delta
St3gal1	PREDICTED: ST3 beta-galactoside alpha-2,3-sialyltransferase 1
Stac	PREDICTED: SH3 and cysteine rich domain
Stat3	Signal transducer and activator of transcription 3
Stk11	Serine/threonine kinase 11
Syt12	PREDICTED: synaptotagmin XII
Syt7	Synaptotagmin VII
Tceb3	Transcription elongation factor B
Tcf20	Transcription factor 20
Tead1	TEA domain family member 1
Tgm1	Transglutaminase 1
Thbs3	Thrombospondin 3
Tmed9	Transmembrane emp24 protein transport domain containing 9
Tmem119	Transmembrane protein 119
Tmem120b	Transmembrane protein 120B
Tmem154	PREDICTED: transmembrane protein 154
Tmem180	Transmembrane protein 180
Tmem2	Transmembrane protein 2
Tnfrsf21	Tumor necrosis factor receptor superfamily, member 21
Tp53inp1	PREDICTED: tumor protein p53 inducible nuclear protein 1
Tpd52l2	Tumor protein D52-like 2
Tpgs2	Tubulin polyglutamylase complex subunit 2
Tprn	Taperin
Trappc5	Trafficking protein particle complex 5
Trem2	Triggering receptor expressed on myeloid cells 2
Trh	Thyrotropin releasing hormone
Trim54	Tripartite motif-containing 54
Trim65	Tripartite motif-containing 65
Trps1	Trichorhinophalangeal syndrome I
Tsc22d4	TSC22 domain family, member 4
Tspyl5	PREDICTED: TSPY-like 5
Ttc27	Tetratricopeptide repeat domain 27
Ubr4	Ubiquitin protein ligase E3 component n-recognin 4
Uhrf1bp1l	UHRF1 binding protein 1-like
Vapa	VAMP (vesicle-associated membrane protein)-associated protein A
Vash1	PREDICTED: vasohibin 1
Vcan	Versican
Wdr5	WD repeat domain 5
Wdr66	PREDICTED: WD repeat domain 66
Wdr91	WD repeat domain 91
Wdyhv1	WDYHV motif containing 1
Wfdc1	WAP four-disulfide core domain 1
XR_146270	PREDICTED: ruvB-like 2-like
Ywhah	Tyrosine 3-monooxygenase/tryptophan 5-monooxygenase activation protein, eta
Zak	PREDICTED: sterile alpha motif and leucine zipper containing kinase AZK
Zc3hc1	Zinc finger, C3HC-type containing 1
Zdhhc9	Zinc finger, DHHC-type containing 9
Znf146	PREDICTED: zinc finger protein 146

## Sheet: Femelle Up in landiolol
List of the 71 genes significantly up-regulated in CLP+Lnd vs CLP in female (SAM 2, FDR<0,05). The common genes between male and female are found in blue.
Gene	Description
Abhd17c	Abhydrolase domain containing 17C
Actr3b	ARP3 actin-related protein 3 homolog B
Adgra2	PREDICTED: adhesion G protein-coupled receptor A2
Adra1a	Adrenoceptor alpha 1A
Ago4	PREDICTED: argonaute 4, RISC catalytic component
Akap6	A-kinase anchoring protein 6
Arhgap44	PREDICTED: Rho GTPase activating protein 44
Arhgap6	PREDICTED: Rho GTPase activating protein 6
Asb18	Ankyrin repeat and SOCS box-containing 18
Baiap2l1	BAI1-associated protein 2-like 1
Bean1	PREDICTED: brain expressed, associated with NEDD4, 1
CB315863	AGENCOURT_11525133 NICHD_Rr_Pit1 cDNA clone IMAGE:6888008 5' sequence
Cited2	Cbp/p300-interacting transactivator, with Glu/Asp-rich carboxy-terminal domain, 2
Col4a5	Collagen type IV alpha 5 chain
Colq	Collagen like tail subunit of asymmetric acetylcholinesterase
Cst3	Cystatin C
Cyp27a1	Cytochrome P450, family 27, subfamily a, polypeptide 1
Derl3	Derlin 3
Dnajc5	DnaJ heat shock protein family
Dusp26	Dual specificity phosphatase 26
Eepd1	Endonuclease/exonuclease/phosphatase family domain containing 1
ENSRNOT00000076472	COllagen type IV alpha 4 chain
ENSRNOT00000077503	COllagen type IV alpha 4 chain
Erbb3	ERb-b2 receptor tyrosine kinase 3
Ern1	Endoplasmic reticulum to nucleus signaling 1
Fancg	PREDICTED: Fanconi anemia, complementation group G
Frem1	PREDICTED: Fras1 related extracellular matrix 1
Gabarapl1	GABA type A receptor associated protein like 1
Gpr37l1	G protein-coupled receptor 37-like 1
Hist2h2be	PREDICTED: histone cluster 2, H2be
Igf1	PREDICTED: insulin-like growth factor 1
Insig1	Insulin induced gene 1
Irs1	Insulin receptor substrate 1
Kcnn1	PREDICTED: potassium calcium-activated channel subfamily N member 1
Kctd12	PREDICTED: potassium channel tetramerization domain containing 12
Lig4	DNA ligase 4
LOC100910319	PREDICTED: uncharacterized LOC100910319
LOC102553702	PREDICTED: uncharacterized LOC102553702
Med9	Mediator complex subunit 9
Mettl7a	Methyltransferase like 7A
Mobp	PREDICTED: myelin-associated oligodendrocyte basic protein
Myl12a	Myosin light chain 12A
Nckap1l	NCK associated protein 1 like
Nckap5	PREDICTED: NCK-associated protein 5
NEWGENE_1591402	PREDICTED: pleckstrin homology like domain family B member 2
Npepo	PREDICTED: aminopeptidase O
Nsun4	PREDICTED: NOP2/Sun RNA methyltransferase family member 4
Osbpl6	PREDICTED: oxysterol binding protein-like 6
Ostf1	Osteoclast stimulating factor 1
Pde4c	Phosphodiesterase 4C
Pkig	CAMP-dependent protein kinase inhibitor gamma
Ppfibp1	PPFIA binding protein 1
Primpol	PREDICTED: primase and DNA directed polymerase
Prkab1	Protein kinase AMP-activated non-catalytic subunit beta 1
Prx	Periaxin
RGD1309362	Similar to interferon-inducible GTPase
RGD1563482	Similar to hypothetical protein FLJ38663
Sez6	Seizure related 6 homolog
Sgcg	Sarcoglycan, gamma
Sh2d4a	SH2 domain containing 4A
Slc16a13	Solute carrier family 16, member 13
Slc29a1	Solute carrier family 29 member 1
Tef	TEF, PAR bZIP transcription factor
Tgfbr2	PREDICTED: transforming growth factor, beta receptor 2
Tjp2	Tight junction protein 2
Tmco4	Transmembrane and coiled-coil domains 4
Tmx4	Thioredoxin-related transmembrane protein 4
Trim62	PREDICTED: tripartite motif-containing 62
Tubgcp6	Tubulin, gamma complex associated protein 6
Ube4b	Ubiquitination factor E4B
Vps13a	Vacuolar protein sorting 13A

## Sheet: Femelle Down in landiolol
List of the 12 genes in female significantly down-regulated in CLP +Lnd vs CLP (SAM 2, FDR<0,05). The common genes between male and female are found in blue.
Gene	Description
Bcar1	BCAR1, Cas family scaffolding protein
Ccdc85c	PREDICTED: coiled-coil domain containing 85C
Cenpa	Centromere protein A
Cntnap1	Contactin associated protein 1
Crem	CAMP responsive element modulator
Galnt2	Polypeptide N-acetylgalactosaminyltransferase 2
Ippk	Inositol-pentakisphosphate 2-kinase
Mybpc2	Myosin binding protein C, fast-type
Pde10a	Phosphodiesterase 10A
Ptprn	PRotein tyrosine phosphatase, receptor type, N
Rcan2	Regulator of calcineurin 2
Slk	PREDICTED: STE20-like kinase
