# Supplementary material for: Effect of landiolol on sex-related transcriptomic changes in the myocardium during sepsis
Source: Intensive Care Med Exp. 2019 Aug 19;7:50. doi: 10.1186/s40635-019-0263-0 (PMC6701793; doi:10.1186/s40635-019-0263-0)
Supplement: Supplementary file 2 — Lists of differentially expressed genes with a characteristic V form in male. Lists of the significantly up- and down-regulated genes in sepsis and back-regulated by landiolol infusion in males. (XLSX 41 kb) [file 40635_2019_263_MOESM2_ESM.xlsx]

## Sheet: up-down V-form
List of the 226 genes with a V-form (up-down) in male
Gene	Description
AW914998	cDNA clone RGIBN31 5' end
A2m	Alpha-2-Macroglobulin
AA925776	cDNA clone UI-R-A1-ep-h-12-0-UI 3'
Abl1	Abl Proto-Oncogene 1, Non-Receptor Tyrosine Kinase
Abr	Active Bcr-Related
Ace	Angiotensin I Converting Enzyme
Acer2	Alkaline Ceramidase 2
Adamts9	Adam Metallopeptidase With Thrombospondin Type 1 Motif, 9
Adora3	Adenosine A3 Receptor
Ahsg	Alpha-2-Hs-Glycoprotein
AI556689	cDNA clone Ui-R-C2P-Rj-C-12-0-Ui 3'
Akap13	A Kinase
Anp32b	Acidic (leucine-rich) nuclear phosphoprotein 32 family, member B
Antxr2	Predicted: Anthrax Toxin Receptor 2
Arhgap10	Rho Gtpase Activating Protein 10
Arhgap31	Rho Gtpase Activating Protein 31
Arl5a	Predicted: Adp-Ribosylation Factor-Like 5A
Atl3	Atlastin Gtpase 3
B4galt1	Udp-Gal:Betaglcnac Beta 1,4- Galactosyltransferase, Polypeptide 1
B4galt6	Udp-Gal:Betaglcnac Beta 1,4-Galactosyltransferase, Polypeptide 6
Bcar1	Breast Cancer Anti-Estrogen Resistance 1
Bcat1	Branched Chain Amino Acid Transaminase 1, Cytosolic
Bdh1	3-Hydroxybutyrate Dehydrogenase, Type 1
BF564093	cDNA Clone Ui-R-C4-Ald-D-09-0-Ui 5'
Bfsp1	Beaded Filament Structural Protein 1, Filensin
BP486224	cDNA Clone Ri03054 3'
Camta1	Calmodulin Binding Transcription Activator 1
Capn10	Calpain 10
CD373272	cDNA Clone Ui-R-Go0-Csi-D-20-0-Ui 5'
Cd59	Cd59 Molecule, Complement Regulatory Protein
Cda	Cytidine Deaminase
Cenpa	Centromere Protein A
Cerk	Ceramide Kinase
CF114236	cDNA Clone Na4853 5'
Cfdp1	Craniofacial Development Protein 1
CK653326	cDNA Clone Image:7114503 5'
Corin	Corin, Serine Peptidase
Cpne8	Copine VIII
Crem	Camp Responsive Element Modulator
Csf2rb	Colony Stimulating Factor 2 Receptor, Beta, Low-Affinity
Csnk1a1	Casein Kinase 1, Alpha 1
Ctla2a	Cytotoxic T Lymphocyte-Associated Protein 2 Alpha
Cttn	Cortactin
CX570057	Rvl1169 Wackym-Soares Normalized Rat Vestibular cDNA Library
Dbh	Dopamine Beta-Hydroxylase
Ddx31	DEAD (Asp-Glu-Ala-Asp) box polypeptide 31
Defb4	Defensin Beta 4
Depdc7	Dep Domain Containing 7
Dlgap1	Discs, large (Drosophila) homolog-associated protein 1
	Dual-specificity tyrosine-(Y)-phosphorylation regulated kinase 3
Ebf1	Early B-Cell Factor 1
Ecscr	Predicted: Endothelial Cell Surface Expressed Chemotaxis And Apoptosis Regulator
Ednrb	Endothelin Receptor Type B
Eefsec	Eukaryotic Elongation Factor, Selenocysteine-Trna-Specific
ENSRNOT00000007419	Predicted: Glucoside Xylosyltransferase 2
ENSRNOT00000011061	Predicted: Ww And C2 Domain Containing 1
ENSRNOT00000012543	Unknown
ENSRNOT00000013761	Unknown
ENSRNOT00000014191	Predicted: Similar To Dystonin Isoform 1
ENSRNOT00000018251	Predicted: Hypothetical Protein Loc691161
ENSRNOT00000018953	Predicted: Forkhead-Associated
ENSRNOT00000024174	Predicted: Ran Binding Protein 9
ENSRNOT00000024556	Unknown
ENSRNOT00000025426	Unknown
ENSRNOT00000026448	Predicted: Arfgap With Rhogap Domain, Ankyrin Repeat And Ph Domain 1
ENSRNOT00000026654	Predicted: Protein Tyrosine Phosphatase, Receptor Type, N
ENSRNOT00000029109	Predicted: Family With Sequence Similarity 189, Member A2
ENSRNOT00000029593	Predicted: Regulator Of Calcineurin 2
ENSRNOT00000029774	Unknown
ENSRNOT00000029982	Unknown
ENSRNOT00000030798	Predicted: Alpha-Kinase 1
ENSRNOT00000036340	Unknown
ENSRNOT00000036374	Predicted: Family With Sequence Similarity 179, Member A
ENSRNOT00000036995	Predicted: Adamts-Like 2
ENSRNOT00000039846	Predicted: Heterogeneous Nuclear Ribonucleoprotein A1-Like
ENSRNOT00000040517	Unknown
ENSRNOT00000041472	Unknown
ENSRNOT00000044346	Tl0Aca43Yi20 mRNA Sequence
ENSRNOT00000048218	Predicted: Pericentrin
ENSRNOT00000048258	Unknown
ENSRNOT00000050834	Predicted: Transcriptional Enhancer Factor Tef-3-Like
ENSRNOT00000058957	Unknown
ENSRNOT00000065971	cDNA Clone Image:9033955
ENSRNOT00000074647	Unknown
ENSRNOT00000075631	Similar To Fatty Acid-Binding Protein, Epidermal
Entpd1	Ectonucleoside Triphosphate Diphosphohydrolase 1
Epb4.1	Predicted: Erythrocyte Membrane Protein Band 4.1
Epha7	Eph Receptor A7
Ercc3	Excision Repair Cross-Complementation Group 3
EX490449	Agencourt_118848732 Nih_Mgc_246 Cdna Clone Image:8882493 5', Mrna Sequence [Ex490449]
Exosc2	Exosome Component 2
Fabp5	Fatty Acid Binding Protein 5, Epidermal
Fam161a	Family With Sequence Similarity 161, Member A
Fgf2	Fibroblast Growth Factor 2
Flot1	Flotillin 1
Fndc3b	Predicted: Fibronectin Type Iii Domain Containing 3B
Foxq1	Forkhead Box Q1
FQ220235	Tl0Ada43Yl03 Mrna Sequence
FQ230284	Tl0Aea9Yk01 Mrna Sequence
FQ233225	Tl0Aea62Yl02 Mrna Sequence
G3bp2	Predicted: Gtpase Activating Protein
Gatsl2	Gats Protein-Like 2
Grk5	Predicted: G Protein-Coupled Receptor Kinase 5
Heatr1	Heat Repeat Containing 1
Herc4	Hect And Rld Domain Containing E3 Ubiquitin Protein Ligase 4
Hivep2	Human Immunodeficiency Virus Type I Enhancer Binding Protein 2
Hmox1	Heme Oxygenase 1
Hnrnpa1	Heterogeneous Nuclear Ribonucleoprotein A1
Hspb1	Heat Shock Protein B1
Il6r	Interleukin 6 Receptor
Impdh2	IMP (inosine 5'-monophosphate) dehydrogenase 2
Ippk	Inositol 1,3,4,5,6-Pentakisphosphate 2-Kinase
Jmjd1c	Jumonji Domain Containing 1C
Lbp	Lipopolysaccharide Binding Protein
Lce1f	Late Cornified Envelope 1F
Lcn2	Lipocalin 2
Ldlrad4	Low Density Lipoprotein Receptor Class A Domain Containing 4
Lgalsl	Lectin, Galactoside-Binding-Like
Lnx2	Ligand Of Numb-Protein X 2
LOC100158225	Hypothetical Protein Loc100158225
LOC100909406	Predicted: Uncharacterized Loc100909406
LOC102546992	Predicted: Uncharacterized Loc102546992
LOC102547047	Predicted: Uncharacterized Loc102547047
LOC102547522	Predicted: Uncharacterized Loc102547522
LOC102548772	Predicted: Uncharacterized Loc102548772
LOC102550100	Predicted: Uncharacterized Loc102550100
LOC102550584	Predicted: Hornerin-Like
LOC102552343	Predicted: Uncharacterized Loc102552343
LOC102553109	Predicted: Uncharacterized Loc102553109
LOC102554570	Predicted: Uncharacterized Loc102554570
LOC102555426	Predicted: Uncharacterized Loc102555426
LOC102556115	Predicted: Uncharacterized Loc102556115
LOC102556488	Predicted: Uncharacterized Loc102556488
LOC103690397	Predicted: Uncharacterized Loc103690397
LOC103691381	Predicted: Uncharacterized Loc103691381
LOC103692572	Predicted: Uncharacterized Loc103692572
LOC103693713	Predicted: Uncharacterized Loc103693713
LOC103694141	Predicted: Uncharacterized Loc103694141
LOC103694914	Predicted: Uncharacterized Loc103694914
Lrch1	Predicted: Leucine-Rich Repeats And Calponin Homology
Man1a1	Mannosidase, Alpha, Class 1A, Member 1
Mapk14	Mitogen Activated Protein Kinase 14
Mapkapk2	Mitogen-Activated Protein Kinase-Activated Protein Kinase 2
Mapre2	Microtubule-Associated Protein, Rp/Eb Family, Member 2
Mark1	Predicted: Map/Microtubule Affinity-Regulating Kinase 1
Max	Myc Associated Factor X
Mcm4	Minichromosome Maintenance Complex Component 4
Mgst2	Microsomal Glutathione S-Transferase 2
Mical3	Microtubule Associated Monoxygenase, Calponin And Lim Domain Containing 3, Mrna
Mmp24	Matrix Metallopeptidase 24
Mt1a	Metallothionein 1A
Mt2A	Metallothionein 2A
Mturn	Maturin, Neural Progenitor Differentiation Regulator Homolog
Mtus2	Microtubule Associated Tumor Suppressor Candidate 2
Mynn	Myoneurin
Myot	Myotilin
Nap1l5	Nucleosome Assembly Protein 1-Like 5
Net1	Neuroepithelial Cell Transforming 1
Nfkb1	Nuclear Factor Of Kappa Light Polypeptide Gene Enhancer In B-Cells 1
Nipsnap3b	Nipsnap Homolog 3B
Nkd1	Naked Cuticle Homolog 1
Nle1	Notchless Homolog 1
Nob1	Nin1/Rpn12 Binding Protein 1 Homolog
Nol8	Nucleolar Protein 8
Nop16	Nop16 Nucleolar Protein
Nos1ap	Nitric Oxide Synthase 1
Nudt4	Nudix (nucleoside diphosphate linked moiety X)-type motif 4
Ntf3	Neurotrophin 3
Nup88	Nucleoporin 88
Nup93	Nucleoporin 93
Odf3l1	Outer Dense Fiber Of Sperm Tails 3-Like 1
Pak6	Predicted: P21 Protein
Pde10a	Phosphodiesterase 10A
Pdlim1	Pdz And Lim Domain 1
Pdlim5	Predicted: Pdz And Lim Domain 5
Phyhd1	Phytanoyl-Coa Dioxygenase Domain Containing 1
Pla1a	Phospholipase A1 Member A
Prepl	Prolyl Endopeptidase-Like
Prg4	Proteoglycan 4
Ptpn12	Protein Tyrosine Phosphatase, Non-Receptor Type 12
Ptpn2	Protein Tyrosine Phosphatase, Non-Receptor Type 2
Ptprk	Protein Tyrosine Phosphatase, Receptor Type, K
Ptprn	Protein Tyrosine Phosphatase, Receptor Type, N
Pxk	Px Domain Containing Serine/Threonine Kinase
Rab30	Predicted: Rab30, Member Ras Oncogene Family
Rap1a	Rap1A, Member Of Ras Oncogene Family
Rc3h1	Predicted: Ring Finger And Ccch-Type Domains 1
Rd3l	Retinal Degeneration 3-Like
Reep2	Receptor Accessory Protein 2
RGD1311747	Similar To 2700029M09Rik Protein
RGD1561149	Similar To Mkiaa1522 Protein
Rpl10a	Ribosomal Protein L10A
Rps6ka5	Ribosomal Protein S6 Kinase, Polypeptide 5
Rsph1	Radial Spoke Head 1 Homolog
Scamp1	Secretory Carrier Membrane Protein 1
Scp2	Sterol Carrier Protein 2
Setl1	Set Translocation-Like 1
Shc1	(Src homology 2 domain containing) transforming protein 1
Slc1a1	mRNA for neuronal high affinity glutamate transporter
Slc35f6	Solute Carrier Family 35, Member F6
Slc39a14	Solute Carrier Family 39 , member 14
Slc39a6	Solute Carrier Family 39, member 6
Slc44a2	Solute Carrier Family 44
Slc7a5	Solute Carrier Family 7
Sptlc2	Serine Palmitoyltransferase, Long Chain Base Subunit 2
St3gal1	Predicted: St3 Beta-Galactoside Alpha-2,3-Sialyltransferase 1
Stat3	Signal Transducer And Activator Of Transcription 3
Syt12	Predicted: Synaptotagmin Xii
Tcf20	Transcription Factor 20
Tead1	Tea Domain Family Member 1
Tgm1	Transglutaminase 1
Tmem2	Transmembrane Protein 2
Tp53inp1	Predicted: Tumor Protein P53 Inducible Nuclear Protein 1
Tpd52l2	Tumor Protein D52-Like 2
Tprn	Taperin
Trh	Thyrotropin Releasing Hormone
Trim54	Tripartite Motif-Containing 54
Ttc27	Tetratricopeptide Repeat Domain 27
Ubr4	Ubiquitin Protein Ligase E3 Component N-Recognin 4
Uhrf1bp1l	UHRF1 binding protein 1-like
Vapa	VAMP (vesicle-associated membrane protein)-associated protein A
Vash1	Predicted: Vasohibin 1
Wdr5	Wd Repeat Domain 5
Wdr91	Wd Repeat Domain 91
Zak	Predicted: Sterile Alpha Motif And Leucine Zipper Containing Kinase Azk
Zdhhc9	Zinc Finger, Dhhc-Type Containing 9

## Sheet: down-up V-form
List of the 247 genes with a V-form (down-up) in male
Gene	Description
Abca8a	Atp-Binding Cassette Subfamily A Member 8A
Abca9	Predicted: Atp-Binding Cassette Subfamily A Member 9
Abcg3l1	Atp-Binding Cassette Sufamily G Member 3-Like 1
Abhd16a	Abhydrolase Domain Containing 16A
Abhd8	Abhydrolase Domain Containing 8
Acsl1	Acyl-Coa Synthetase Long-Chain Family Member 1
Acss1	Acyl-Coa Synthetase Short-Chain Family Member 1
Adcyap1r1	Adenylate Cyclase Activating Polypeptide 1 Receptor Type 1
Adra1a	Adrenoceptor Alpha 1A
Afap1l2	Actin Filament Associated Protein 1-Like 2
Agpat3	1-Acylglycerol-3-Phosphate O-Acyltransferase 3
Akap1	A Kinase Anchor Protein 1
Akap6	A Kinase Anchor Protein 6
Aldh3a1	Aldehyde Dehydrogenase 3 Family Member A1
Anxa10	Annexin A10
Aoc3	Amine Oxidase
Ar	Androgen Receptor
Arhgap28	Predicted: Rho Gtpase Activating Protein 28
Asb15	Predicted: Ankyrin Repeat And Socs Box Containing 15
Asb18	Ankyrin Repeat And Socs Box-Containing 18
Bcl2	B-Cell Cll/Lymphoma 2
BI295828	cDNA Clone Ui-R-Dk0-Cfb-B-05-0-Ui 3'
Car11	Carbonic Anhydrase 11
CB605830	cDNA Clone Nrdg1-00077-B5 5'
Ccdc69	Coiled-Coil Domain Containing 69
Cck	Cholecystokinin
Cd247	Cd247 Molecule Transcript Variant 1
Cd3g	Cd3 Molecule Gamma
Cdc34	Cell Division Cycle 34
Chmp1a	Charged Multivesicular Body Protein 1A
Chst15	Predicted: Carbohydrate
Cluh	Clustered Mitochondria
Cmpk2	Cytidine Monophosphate
CO398263	Agencourt_26756290 Nih_Mgc_255 Cdna Clone Image:7319437 5'
Col6a3	Predicted: Collagen Type Vi Alpha 3
Cplx2	Complexin 2
Ctgf	Connective Tissue Growth Factor
CV109460	Agencourt_31522624 Nih_Mgc_269 Cdna Clone Image:7459544 5'
Cxcl9	Chemokine (C-X-C Motif) Ligand 9
Cyth3	Cytohesin 3
Dact3	Dapper Antagonist Of Beta-Catenin Homolog 3
Ddah2	Dimethylarginine Dimethylaminohydrolase 2
Dhrs7c	Dehydrogenase/Reductase
Dhx35	Deah (Asp-Glu-Ala-His) Box Polypeptide 35
Dlg2	Predicted: Discs, Large Homolog 2
Dock10	Predicted: Dedicator Of Cytokinesis 10
Dok7	Predicted: Docking Protein 7
Dscc1	Dna Replication And Sister Chromatid Cohesion 1
DV723748	Rvl15663 Wackym-Soares Normalized Rat Vestibular Cdna Library Cdna 5'
Efcc1	Predicted: Ef-Hand And Coiled-Coil Domain Containing 1
Enpp1	Predicted: Ectonucleotide Pyrophosphatase/Phosphodiesterase 1
ENSRNOT00000000246	Predicted: Lipase Maturation Factor 1
ENSRNOT00000005015	Predicted: Galactosylceramidase
ENSRNOT00000008645	Predicted: Loss Of Heterozygosity
ENSRNOT00000009491	Tl0Aaa46Yh20 Mrna Sequence.
ENSRNOT00000021603	Unknown
ENSRNOT00000017998	Unknown
ENSRNOT00000023721	Predicted: Similar To 1190005I06Rik Protein
ENSRNOT00000024639	Predicted: Zinc Finger Protein 768-Like
ENSRNOT00000025795	Predicted: Spectrin Repeat Containing Nuclear Envelope 1 (Syne1)
ENSRNOT00000034062	Unknown
ENSRNOT00000034097	Predicted: Uncharacterized Loc100912785
ENSRNOT00000043269	Predicted: Hypothetical Protein Loc100360856
ENSRNOT00000048985	Tenascin Xb
ENSRNOT00000050090	Predicted: Transmembrane Protein 258 B
ENSRNOT00000051326	Mmaj2969 S-Periaxin {Mus Musculus}
ENSRNOT00000064850	Predicted: Palladin,Cytoskeletal Associated Protein
ENSRNOT00000066348	Predicted: Nicotinamide Riboside Kinase 2
ENSRNOT00000067522	Predicted: Translocase Of Outer Mitochondrial Membrane 5 Homolog
ENSRNOT00000072081	Predicted: Similar To Butyrophilin 3
ENSRNOT00000073547	Predicted: Interferon-Induced Protein 44-Like
Evc	Ellis Van Creveld Protein
Extl1	Exostosin-Like Glycosyltransferase 1
Fam178b	Family With Sequence Similarity 178
Fam195a	Family With Sequence Similarity 195
Fam73b	Family With Sequence Similarity 73
Fez1	Fasciculation And Elongation Protein Zeta 1
Flvcr2	Feline Leukemia Virus Subgroup C Cellular Receptor Family
FM080674	Fm080674 Etnoaor Cdna Clone Etnoaorp0039A24 5'
FQ214134	Tl0Aaa43Yk21 Mrna Sequence.
Frem1	Predicted: Fras1 Related Extracellular Matrix 1
Fuom	Fucose Mutarotase
Fyco1	Fyve And Coiled-Coil Domain Containing 1
Fzd8	Frizzled Class Receptor 8
Gcsam	Predicted: Germinal Center-Associated, Signaling And Motility
Gfra3	Gdnf Family Receptor Alpha 3
Ghr	Predicted: Growth Hormone Receptor
Glb1l2	Predicted: Galactosidase
Golim4	Predicted: Golgi Integral Membrane Protein 4
Grip2	Glutamate Receptor Interacting Protein 2
Gulp1	Engulfment Adaptor Ptb Domain Containing 1
Gzmc	Granzyme C
Il34	Interleukin 34
Irf7	Interferon Regulatory Factor 7
Isg15	Isg15 Ubiquitin-Like Modifier
Itgbl1	Integrin Beta-Like 1
Kank2	Kn Motif And Ankyrin Repeat Domains 2
Kazald1	Kazal-Type Serine Peptidase Inhibitor Domain 1
Kazn	Predicted: Kazrin Periplakin Interacting Protein
Kcnip2	Kv Channel-Interacting Protein 2
Kcnj8	Potassium Channel
Kcnn1	Predicted: Potassium Intermediate/Small Conductance Calcium-Activated Channel
Klc3	Kinesin Light Chain 3
Lat2	Linker For Activation Of T Cells Family
Lgals9	Lectin
Lims2	Lim And Senescent Cell Antigen Like Domains 2
Lmo7	Lim Domain 7
LOC100125365	Hypothetical Protein Loc100125365
LOC100362814	Predicted: Hypothetical Protein Loc100362814
LOC100366216	Predicted: Nuclear Antigen Sp100-Like
LOC100910792	Predicted: Amphiphysin-Like
LOC100910949	Predicted: Uncharacterized Loc100910949
LOC100910978	Predicted: Extracellular Matrix Protein 2-Like
LOC100911384	Predicted: Uncharacterized Loc100911384
LOC100911572	Predicted: Collagen Alpha-3
LOC100912658	Predicted: Probable Atp-Dependent Rna Helicase Ddx60-Like
LOC102547411	Predicted: Uncharacterized Loc102547411
LOC102548417	Predicted: Uncharacterized Loc102548417
LOC102548546	Predicted: Zinc Finger Protein 709-Like
LOC102549572	Predicted: Uncharacterized Loc102549572
LOC102550392	Predicted: Uncharacterized Loc102550392
LOC102554096	Predicted: Guanylate-Binding Protein 6-Like
LOC102554789	Predicted: Uncharacterized Loc102554789
LOC102556671	Predicted: Uncharacterized Loc102556671
LOC102557498	Predicted: Collagen Alpha-4
LOC103691014	Predicted: Uncharacterized Loc103691014
LOC103692639	Predicted: Uncharacterized Loc103692639
LOC103693338	Predicted: Uncharacterized Loc103693338
LOC683897	Similar To Protein C6Orf203
LOC689065	Hypothetical Protein Loc689065
LOC690138	Predicted: Similar To Upf0197 Protein C11Orf10 Homolog
LOC691485	Predicted: Hypothetical Protein Loc691485
LOC691853	Predicted: Similar To Cox10 Homolog, Cytochrome C Oxidase Assembly Protein
Lrp4	Low Density Lipoprotein Receptor-Related Protein 4
Lrrc39	Leucine Rich Repeat Containing 39
Lrrc48	Leucine Rich Repeat Containing 48
Mapt	Microtubule-Associated Protein Tau
Mbp	Myelin Basic Protein
Metrnl	Meteorin Glial Cell Differentiation Regulator-Like
Mfn1	Predicted: Mitofusin 1
Mgat3	Predicted: Mannosyl
Mrpl20	Mitochondrial Ribosomal Protein L20
Mthfsd	Predicted: Methenyltetrahydrofolate Synthetase Domain Containing
Myh7b	Myosin
Myocd	Myocardin
Myoz1	Myozenin 1
Naa40	Natd Catalytic Subunit
Naalad2	Predicted: N-Acetylated Alpha-Linked Acidic Dipeptidase 2
Narfl	Nuclear Prelamin A Recognition Factor-Like
Nck2	Nck Adaptor Protein 2
Nexn	Nexilin
Nfatc2	Predicted: Nuclear Factor Of Activated T-Cells
Nfic	Predicted: Nuclear Factor I/C
Nr0b2	Nuclear Receptor Subfamily 0
Nr2f1	Nuclear Receptor Subfamily 2
Nrarp	Notch-Regulated Ankyrin Repeat Protein
Nrp1	Neuropilin 1
Omd	Osteomodulin
Osbpl6	Predicted: Oxysterol Binding Protein-Like 6
Paqr4	Progestin And Adipoq Receptor Family Member Iv
Pcdh19	Predicted: Protocadherin 19
Pcolce	Procollagen C-Endopeptidase Enhancer
Perm1	Ppargc1 And Esrr Induced Regulator
Phf11b	Phd Finger Protein 11B
Phldb1	Pleckstrin Homology-Like Domain
Phldb2	Predicted: Pleckstrin Homology-Like Domain
Pkig	Protein Kinase
Plcb4	Phospholipase C
Plekhb1	Pleckstrin Homology Domain Containing
Plp1	Proteolipid Protein 1
Ppargc1b	Peroxisome Proliferator-Activated Receptor Gamma
Ppp1r14a	Protein Phosphatase 1
Ppp1r3c	Protein Phosphatase 1
Prph	Peripherin
Ptp4a3	Protein Tyrosine Phosphatase Type Iva
Ptpn21	Protein Tyrosine Phosphatase
Ptpn4	Protein Tyrosine Phosphatase
Ptprcap	Protein Tyrosine Phosphatase
Ptpro	Protein Tyrosine Phosphatase
Qki	Predicted: Protein Quaking-Like
Rab11fip4	Predicted: Rab11 Family Interacting Protein 4
Rab7b	Rab7B
Ranbp3l	Predicted: Ran Binding Protein 3-Like
Rasd2	Rasd Family
Rasgrp3	Ras Guanyl Releasing Protein 3
Rftn2	Predicted: Raftlin Family Member 2
RGD1309651	Predicted: Similar To 1190005I06Rik Protein
RGD1564899	Predicted: Similar To Chromosome 10 Open Reading Frame 71
Rgl1	Predicted: Ral Guanine Nucleotide Dissociation Stimulator
Rgl3	Ral Guanine Nucleotide Dissociation Stimulator-Like 3
Rgs10	Regulator Of G-Protein Signaling 10
Rnf115	Ring Finger Protein 115
Rnf152	Ring Finger Protein 152
Rtp4	Receptor
Runx1t1	Runt-Related Transcription Factor 1
S100a6	S100 Calcium Binding Protein A6
S100b	S100 Calcium Binding Protein B
Scrn1	Predicted: Secernin 1
Sema3b	Sema Domain
Sept4	Septin 4
Sh2d4a	Sh2 Domain Containing 4A
Sh3bp5	Sh3-Domain Binding Protein 5
Sirt5	Sirtuin 5
Skida1	Predicted: Ski/Dach Domain Containing 1
Slain2	Slain Motif Family
Slc25a42	Solute Carrier Family 25
Slc26a6	Solute Carrier Family 26
Slc29a1	Solute Carrier Family 29
Slfn5	Predicted: Schlafen Family Member 5
Snn	Stannin
Sod3	Superoxide Dismutase 3
St3gal6	St3 Beta-Galactoside Alpha-2
Stk36	Serine/Threonine Kinase 36
Sult5a1	Sulfotransferase Family 5A
Synj2	Synaptojanin 2
Synpo2l	Synaptopodin 2-Like
Syt5	Synaptotagmin V
Sytl4	Predicted: Synaptotagmin-Like 4
Tlr12	Predicted: Toll-Like Receptor 12
Tmem171	Transmembrane Protein 171
Tmem179	Transmembrane Protein 179
Tmem258b	Predicted: Transmembrane Protein 258 B
Tmsb10	Thymosin Beta 10
Tnfaip8	Tumor Necrosis Factor Alpha-Induced Protein 8
Tpbgl	Predicted: Trophoblast Glycoprotein-Like
Tppp3	Tubulin Polymerization-Promoting Protein Family Member 3
Trim7	Predicted: Tripartite Motif-Containing 7
Trpc1	Transient Receptor Potential Cation Channel, Subfamily C Member 1
Trpc3	Transient Receptor Potential Cation Channel, Subfamily C Member 3
Ttc7b	Predicted: Tetratricopeptide Repeat Domain 7B
Tuba8	Tubulin Alpha 8
Usp18	Ubiquitin Specific Peptidase 18
Vav2	Vav 2 Guanine Nucleotide Exchange Factor
Vipas39	Vps33B Interacting Protein Apical-Basolateral Polarity Regulator Spe-39 Homolog
Vipr1	Vasoactive Intestinal Peptide Receptor 1
Vipr2	Vasoactive Intestinal Peptide Receptor 2
Vom2r-ps135	Predicted: Vomeronasal 2 Receptor
Wipf3	Predicted: Was/Wasl Interacting Protein Family
Wnt11	Wingless-Type Mmtv Integration Site Family
Yif1a	Yip1 Interacting Factor Homolog A
Zfp14	Zfp14 Zinc Finger Protein
Zfp606	Predicted: Zinc Finger Protein 606
Zfp618	Predicted: Zinc Finger Protein 618
Zfp629	Zinc Finger Protein 629
Zfp641	Zinc Finger Protein 641
Zfp955a	Zinc Finger Protein 955A
Zscan18	Predicted: Zinc Finger And Scan Domain Containing 18
